# Supplementary material for: Identification of complex genomic rearrangements in cancers using CouGaR
Source: PubMed Central journal article supplement — Genome Res. 2017 Jan;27(1):107–17. doi: 10.1101/gr.211201.116 (PMC5204335; doi:10.1101/gr.211201.116), 2017-01
Supplement: supp_gr.211201.116_Supplemental_Table_S1.pdf [file supp_gr.211201.116_Supplemental_Table_S1.pdf]

| <b>Sample</b> | <b>Contigs</b> | <b>Linear</b> | <b>Circular</b> |
|---------------|----------------|---------------|-----------------|
| DIPG01        | 6              | 2             | 4               |
| DIPG03        | 0              | 0             | 0               |
| DIPG04        | 0              | 0             | 0               |
| DIPG06        | 3              | 3             | 0               |
| DIPG07        | 1              | 0             | 1               |
| DIPG08        | 0              | 0             | 0               |
| DIPG18        | 0              | 0             | 0               |
| DIPG19        | 0              | 0             | 0               |
| DIPG24        | 0              | 0             | 0               |
| DIPG25        | 0              | 0             | 0               |
| DIPG26        | 0              | 0             | 0               |
| DIPG27        | 0              | 0             | 0               |
| DIPG28        | 4              | 4             | 0               |
| DIPG29        | 8              | 3             | 5               |
| DIPG30        | 1              | 0             | 1               |
| DIPG57        | 2              | 0             | 2               |
| DIPG58        | 0              | 0             | 0               |
| DIPG60        | 0              | 0             | 0               |
| DIPG61        | 2              | 1             | 1               |
| DIPG62        | 2              | 2             | 0               |
