# Supplementary material for: Identification of complex genomic rearrangements in cancers using CouGaR
Source: PubMed Central journal article supplement — Genome Res. 2017 Jan;27(1):107–17. doi: 10.1101/gr.211201.116 (PMC5204335; doi:10.1101/gr.211201.116), 2017-01
Supplement: supp_gr.211201.116_Supplemental_Table_S2.pdf [file supp_gr.211201.116_Supplemental_Table_S2.pdf]

| Breakpoint | From Chr | Pos 1       | To Chr | Pos 2       | Copy count estimate | qPCR copy count | PCR Product | Sanger Validation |
|------------|----------|-------------|--------|-------------|---------------------|-----------------|-------------|-------------------|
| A          | 1        | 203,246,644 | 2      | 8,912,431   | 12                  | 11.1            | +           | +                 |
| B          | 1        | 203,266,639 | 1      | 204,804,356 | 24                  | 32.1            | +           | +                 |
| C          | 1        | 203,369,034 | 1      | 204,164,224 | 12                  | n/a             | -           | n/a               |
| D          | 1        | 203,705,025 | 2      | 16,170,477  | 15                  | n/a             | -           | n/a               |
| E          | 1        | 204,608,941 | 2      | 8,931,952   | 12                  | 9.7             | +           | +                 |
| F          | 1        | 204,625,362 | 2      | 8,864,662   | 33                  | 30              | +           | +                 |
| G          | 2        | 8,820,449   | 2      | 16,174,542  | 27                  | 28.8            | +           | +                 |
| H          | 2        | 8,963,783   | 2      | 15,743,871  | 42                  | 34.6            | +           | +                 |
| I          | 2        | 15,744,183  | 2      | 16,073,416  | 42                  | 41.7            | +           | +                 |
| GPX7       | 1        | 53,068,043  | 1      | 53,074,723  | 2                   | 2               | +           | n/a               |
