# Supplementary material for: Identification of complex genomic rearrangements in cancers using CouGaR
Source: PubMed Central journal article supplement — Genome Res. 2017 Jan;27(1):107–17. doi: 10.1101/gr.211201.116 (PMC5204335; doi:10.1101/gr.211201.116), 2017-01
Supplement: supp_gr.211201.116_Supplemental_Table_S3.pdf [file supp_gr.211201.116_Supplemental_Table_S3.pdf]

| <b>Breakpoint</b> | <b>From Chr.</b> | <b>Pos 1</b> | <b>To Chr.</b> | <b>Pos 2</b> | <b>Copy count estimate</b> | <b>qPCR copy count</b> | <b>PCR Product</b> | <b>Sanger Validation</b> |
|-------------------|------------------|--------------|----------------|--------------|----------------------------|------------------------|--------------------|--------------------------|
| A                 | 8                | 130,953,544  | 8              | 128,653,052  | 15                         | 15.1                   | +                  | +                        |
| B                 | 8                | 128,666,609  | 8              | 129,034,194  | 15                         | 19                     | +                  | +                        |
| C                 | 8                | 128,683,093  | 10             | 47,145,556   | 15                         | 17                     | +                  | +                        |
| D                 | 8                | 129,171,189  | 8              | 128,930,932  | 15                         | 18.3                   | +                  | +                        |
| E                 | 10               | 49,223,973   | 8              | 129,845,335  | 15                         | 12.1                   | +                  | +                        |
| F                 | 10               | 47,109,482   | 22             | 38,406,654   | 15                         | n/a                    | +                  | +                        |
| G                 | 22               | 39,621,582   | 10             | 49,253,846   | 15                         | 11.7                   | +                  | +                        |
| H                 | 22               | 38,442,167   | 22             | 39,698,822   | 15                         | 17.3                   | +                  | +                        |
| GPX7              | 1                | 53,068,043   | 1              | 53,074,723   | 2                          | 2                      | +                  | n/a                      |
