# Supplementary material for: Identification of complex genomic rearrangements in cancers using CouGaR
Source: PubMed Central journal article supplement — Genome Res. 2017 Jan;27(1):107–17. doi: 10.1101/gr.211201.116 (PMC5204335; doi:10.1101/gr.211201.116), 2017-01
Supplement: supp_gr.211201.116_Supplemental_Table_S4.pdf [file supp_gr.211201.116_Supplemental_Table_S4.pdf]

| Cougar junctions |      |           |      |           |            | BAMBAM Pipeline | nFuse  |
|------------------|------|-----------|------|-----------|------------|-----------------|--------|
| ID               | chr1 | pos1      | chr2 | pos2      | validation | Report          | Report |
| A                | 1    | 203246644 | 2    | 8912431   | Y          | Y               |        |
| B                | 1    | 203266639 | 1    | 204804356 | Y          | Y               | Y      |
| C                | 1    | 203369034 | 1    | 204164224 | N          | Y               | Y      |
| D                | 2    | 16170477  | 1    | 203705025 | N          | Y               |        |
| E                | 1    | 204608941 | 2    | 8931952   | Y          | Y               |        |
| F                | 1    | 204625362 | 2    | 8864662   | Y          | Y               | Y      |
| G                | 2    | 16174542  | 2    | 8820449   | Y          | Y               | Y      |
| H                | 2    | 8963783   | 2    | 15743871  | Y          | Y               | Y      |
| I                | 2    | 15744183  | 2    | 16073416  | Y          | Y               | Y      |
