# Supplementary material for: Identification of complex genomic rearrangements in cancers using CouGaR
Source: PubMed Central journal article supplement — Genome Res. 2017 Jan;27(1):107–17. doi: 10.1101/gr.211201.116 (PMC5204335; doi:10.1101/gr.211201.116), 2017-01
Supplement: supp_gr.211201.116_Supplemental_Table_S5.pdf [file supp_gr.211201.116_Supplemental_Table_S5.pdf]

| Sample       | Type | Coverage | Contigs | Lines | Loops | AvgLength | NormCov | TumCov  | Ratio      |
|--------------|------|----------|---------|-------|-------|-----------|---------|---------|------------|
| TCGA-DK-A1AC | BLCA | Low      | 125     | 125   | 0     | 2535      | 6.12133 | 6.95129 | 1.13558491 |
| TCGA-DK-A1AD | BLCA | Low      | 51      | 50    | 1     | 2333      | 7.52884 | 5.59671 | 0.7433695  |
| TCGA-DK-A2I6 | BLCA | Low      | 41      | 38    | 3     | 2475      | 6.98142 | 7.00734 | 1.00371271 |
| TCGA-DK-A3IK | BLCA | Low      | 25      | 24    | 1     | 2632      | 4.72563 | 4.32566 | 0.91536155 |
| TCGA-DK-A1A7 | BLCA | High     | 24      | 14    | 10    | 4488      | 29.9589 | 30.9061 | 1.03161665 |
| TCGA-DK-A3IL | BLCA | High     | 22      | 22    | 0     | 2650      | 28.9291 | 31.4929 | 1.08862357 |
| TCGA-GV-A3JW | BLCA | Low      | 14      | 13    | 1     | 3291      | 7.67717 | 5.91984 | 0.77109664 |
| TCGA-DK-A3IN | BLCA | Low      | 13      | 11    | 2     | 2769      | 7.15581 | 7.45633 | 1.04199664 |
| TCGA-DK-A1A6 | BLCA | High     | 12      | 3     | 9     | 4369      | 37.3673 | 30.7518 | 0.82296018 |
| TCGA-DK-A3IV | BLCA | Low      | 10      | 7     | 3     | 2943      | 4.53087 | 4.72147 | 1.04206698 |
| TCGA-BT-A3PJ | BLCA | High     | 10      | 1     | 9     | 4127      | 31.4493 | 33.8174 | 1.07529897 |
| TCGA-FD-A3N5 | BLCA | High     | 10      | 4     | 6     | 3036      | 33.7675 | 38.0948 | 1.12814985 |
| TCGA-DK-A1A5 | BLCA | High     | 9       | 6     | 3     | 4494      | 35.5331 | 30.5858 | 0.86076926 |
| TCGA-K4-A3WV | BLCA | Low      | 9       | 6     | 3     | 3495      | 5.07537 | 5.02414 | 0.98990616 |
| TCGA-GV-A3JV | BLCA | Low      | 9       | 5     | 4     | 3242      | 5.67337 | 6.36844 | 1.12251448 |
| TCGA-GV-A3JZ | BLCA | Low      | 9       | 7     | 2     | 3358      | 4.1891  | 5.97924 | 1.42733284 |
| TCGA-CF-A1HS | BLCA | Low      | 8       | 8     | 0     | 4366      | 5.10028 | 5.68525 | 1.1146937  |
| TCGA-FD-A3SJ | BLCA | Low      | 8       | 7     | 1     | 3197      | 5.36617 | 6.41753 | 1.19592372 |
| TCGA-BT-A2LD | BLCA | Low      | 7       | 7     | 0     | 4319      | 5.99154 | 2.62154 | 0.43754027 |
| TCGA-FD-A3B6 | BLCA | Low      | 7       | 4     | 3     | 3038      | 7.38919 | 8.7656  | 1.18627346 |
| TCGA-BL-A13J | BLCA | High     | 7       | 4     | 3     | 5234      | 30.9731 | 36.8574 | 1.18998098 |
| TCGA-G2-A3VY | BLCA | Low      | 7       | 7     | 0     | 3250      | 6.40788 | 7.91151 | 1.23465327 |
| TCGA-BT-A2LA | BLCA | High     | 6       | 3     | 3     | 4399      | 36.7497 | 33.6381 | 0.91532992 |
| TCGA-H4-A2HQ | BLCA | High     | 6       | 4     | 2     | 3437      | 35.5011 | 32.5159 | 0.91591247 |
| TCGA-G2-A3IE | BLCA | Low      | 6       | 5     | 1     | 3205      | 5.73667 | 7.09318 | 1.23646297 |
| TCGA-BL-A0C8 | BLCA | Low      | 6       | 4     | 2     | 979       | 5.13885 | 6.55976 | 1.2765035  |
| TCGA-FD-A3SR | BLCA | Low      | 5       | 3     | 2     | 3183      | 7.58013 | 6.8348  | 0.90167319 |
| TCGA-GD-A2C5 | BLCA | High     | 5       | 1     | 4     | 3262      | 33.6066 | 32.2923 | 0.96089161 |
| TCGA-GV-A3QH | BLCA | Low      | 5       | 2     | 3     | 3357      | 6.0069  | 5.82009 | 0.96890076 |
| TCGA-CF-A3MI | BLCA | Low      | 5       | 4     | 1     | 4822      | 6.99305 | 6.87734 | 0.98345357 |
| TCGA-GD-A3OS | BLCA | Low      | 5       | 2     | 3     | 3263      | 6.92226 | 6.93823 | 1.00230705 |
| TCGA-BT-A20Q | BLCA | High     | 5       | 4     | 1     | 4669      | 31.6836 | 33.5686 | 1.0594945  |
| TCGA-G2-A2EF | BLCA | Low      | 5       | 5     | 0     | 3201      | 3.25512 | 3.75383 | 1.15320787 |
| TCGA-GV-A3JX | BLCA | Low      | 5       | 5     | 0     | 3320      | 4.45839 | 5.23618 | 1.17445535 |
| TCGA-GC-A3RD | BLCA | Low      | 5       | 3     | 2     | 3272      | 5.30443 | 6.41013 | 1.20844841 |
| TCGA-CU-A0YR | BLCA | Low      | 4       | 2     | 2     | 5051      | 5.6095  | 4.93002 | 0.87886977 |
| TCGA-HQ-A2OE | BLCA | Low      | 4       | 4     | 0     | 3432      | 8.28167 | 8.16419 | 0.98581446 |
| TCGA-DK-A1A3 | BLCA | Low      | 4       | 4     | 0     | 4825      | 7.09047 | 7.32249 | 1.0327228  |
| TCGA-CU-A0YN | BLCA | Low      | 4       | 3     | 1     | 4916      | 5.60883 | 6.33834 | 1.13006456 |
| TCGA-FD-A3SL | BLCA | Low      | 4       | 4     | 0     | 3197      | 5.34015 | 6.3817  | 1.19504134 |
| TCGA-DK-A3IQ | BLCA | Low      | 4       | 4     | 0     | 2823      | 5.81226 | 7.28306 | 1.25305131 |
| TCGA-BT-A20W | BLCA | Low      | 3       | 2     | 1     | 4572      | 7.89084 | 7.29475 | 0.92445798 |
| TCGA-FD-A3NA | BLCA | Low      | 3       | 0     | 3     | 3092      | 6.62064 | 6.49102 | 0.98042183 |
| TCGA-C4-A0F0 | BLCA | Low      | 3       | 0     | 3     | 4039      | 6.37008 | 6.28037 | 0.98591697 |
| TCGA-DK-A3X1 | BLCA | Low      | 3       | 2     | 1     | 2946      | 5.55582 | 5.65438 | 1.01773996 |
| TCGA-FD-A3N6 | BLCA | High     | 3       | 1     | 2     | 3070      | 43.0389 | 44.5981 | 1.03622769 |
| TCGA-FD-A3B3 | BLCA | Low      | 3       | 2     | 1     | 3047      | 6.97012 | 7.2958  | 1.04672516 |
| TCGA-BT-A3PH | BLCA | High     | 3       | 0     | 3     | 4297      | 31.6894 | 35.1031 | 1.10772372 |
| TCGA-DK-A3IU | BLCA | Low      | 3       | 3     | 0     | 2851      | 4.42948 | 7.02024 | 1.58489033 |
| TCGA-DK-A1AE | BLCA | High     | 3       | 3     | 0     | 2383      | 29.9918 | 50.5731 | 1.6862309  |
| TCGA-BT-A2LB | BLCA | Low      | 2       | 1     | 1     | 4450      | 6.99462 | 5.66982 | 0.81059729 |
| TCGA-BT-A20R | BLCA | Low      | 2       | 1     | 1     | 4742      | 6.89837 | 6.70126 | 0.97142658 |
| TCGA-DK-A3X2 | BLCA | Low      | 2       | 2     | 0     | 3052      | 5.61137 | 5.78211 | 1.03042751 |
| TCGA-BT-A20N | BLCA | Low      | 2       | 2     | 0     | 5900      | 7.60434 | 8.00133 | 1.05220571 |
| TCGA-BT-A20P | BLCA | High     | 2       | 0     | 2     | 5314      | 34.3785 | 36.911  | 1.07366523 |
| TCGA-G2-A2ES | BLCA | Low      | 2       | 0     | 2     | 3201      | 7.36092 | 7.90385 | 1.07375844 |

|              |      |      |    |    |   |       |         |         |            |
|--------------|------|------|----|----|---|-------|---------|---------|------------|
| TCGA-CU-A3KJ | BLCA | Low  | 2  | 1  | 1 | 4985  | 4.60094 | 5.56786 | 1.21015706 |
| TCGA-FD-A3B7 | BLCA | Low  | 2  | 2  | 0 | 3049  | 6.67516 | 8.15665 | 1.22194075 |
| TCGA-DK-A2I2 | BLCA | Low  | 2  | 2  | 0 | 2489  | 3.96342 | 6.89651 | 1.74004017 |
| TCGA-CU-A3QU | BLCA | Low  | 1  | 0  | 1 | 4989  | 5.7143  | 5.13517 | 0.8986525  |
| TCGA-FD-A3B4 | BLCA | Low  | 1  | 1  | 0 | 3045  | 7.18295 | 6.55005 | 0.91188857 |
| TCGA-DK-A2HX | BLCA | Low  | 1  | 1  | 0 | 2434  | 7.4805  | 7.11533 | 0.95118374 |
| TCGA-FD-A3SP | BLCA | Low  | 1  | 1  | 0 | 3191  | 7.46442 | 7.17501 | 0.96122807 |
| TCGA-CF-A3MG | BLCA | Low  | 1  | 0  | 1 | 4320  | 4.66667 | 4.56937 | 0.97915002 |
| TCGA-GC-A3BM | BLCA | Low  | 1  | 0  | 1 | 3250  | 5.50538 | 5.80396 | 1.05423422 |
| TCGA-G2-A3IB | BLCA | Low  | 1  | 1  | 0 | 3202  | 6.78465 | 7.6155  | 1.12246026 |
| TCGA-A7-A0D9 | BRCA | Low  | 12 | 7  | 5 | 16700 | 6.6755  | 6.94822 | 1.04085387 |
| TCGA-BH-A0HX | BRCA | Low  | 10 | 10 | 0 | 12341 | 6.22189 | 4.26696 | 0.68579805 |
| TCGA-AO-A0JL | BRCA | Low  | 10 | 6  | 4 | 14431 | 6.94127 | 7.00305 | 1.00890039 |
| TCGA-BH-A0HB | BRCA | Low  | 6  | 6  | 0 | 14426 | 6.70209 | 6.77984 | 1.01160086 |
| TCGA-BH-A0GY | BRCA | Low  | 5  | 4  | 1 | 13875 | 6.2806  | 7.04028 | 1.1209566  |
| TCGA-AR-A0TU | BRCA | Low  | 3  | 2  | 1 | 12778 | 3.91899 | 4.53523 | 1.1572446  |
| TCGA-BH-A0H7 | BRCA | Low  | 2  | 2  | 0 | 16365 | 5.52925 | 6.35796 | 1.14987747 |
| TCGA-B6-A0RE | BRCA | Low  | 2  | 2  | 0 | 11880 | 5.63826 | 6.50692 | 1.15406526 |
| TCGA-AZ-4684 | COAD | Low  | 5  | 5  | 0 | 4447  | 3.82227 | 3.53911 | 0.92591837 |
| TCGA-AA-3664 | COAD | High | 5  | 4  | 1 | 2466  | 30.5827 | 32.6498 | 1.0675905  |
| TCGA-AA-3968 | COAD | Low  | 5  | 5  | 0 | 2582  | 2.69833 | 2.90764 | 1.0775702  |
| TCGA-AA-3494 | COAD | Low  | 5  | 5  | 0 | 2526  | 2.5072  | 2.86955 | 1.14452377 |
| TCGA-AA-A00Z | COAD | Low  | 5  | 5  | 0 | 3655  | 2.75734 | 3.63471 | 1.31819435 |
| TCGA-AA-3994 | COAD | High | 4  | 2  | 2 | 2577  | 29.5801 | 32.6947 | 1.10529376 |
| TCGA-AY-4070 | COAD | Low  | 3  | 1  | 2 | 4058  | 1.8696  | 1.86006 | 0.9948973  |
| TCGA-AA-A02O | COAD | High | 3  | 2  | 1 | 4248  | 34.6479 | 35.5784 | 1.02685588 |
| TCGA-AZ-4614 | COAD | Low  | 2  | 2  | 0 | 3924  | 2.7199  | 1.62717 | 0.59824626 |
| TCGA-A6-2678 | COAD | Low  | 2  | 2  | 0 | 510   | 3.10465 | 3.13624 | 1.01017506 |
| TCGA-AA-3548 | COAD | Low  | 2  | 2  | 0 | 3614  | 3.02621 | 3.25948 | 1.07708322 |
| TCGA-AZ-4681 | COAD | Low  | 2  | 2  | 0 | 4046  | 3.32024 | 3.75985 | 1.13240308 |
| TCGA-AA-3685 | COAD | High | 2  | 1  | 1 | 2405  | 29.3297 | 44.8692 | 1.52982131 |
| TCGA-CM-4746 | COAD | Low  | 1  | 1  | 0 | 4406  | 3.21801 | 3.71512 | 1.15447746 |
| TCGA-AA-3509 | COAD | Low  | 0  | 0  | 0 | 2526  | 2.81845 | 1.64796 | 0.58470436 |
| TCGA-AA-A02K | COAD | Low  | 0  | 0  | 0 | 3655  | 3.10754 | 2.03546 | 0.65500685 |
| TCGA-AA-A01V | COAD | Low  | 0  | 0  | 0 | 3655  | 38.1948 | 29.9922 | 0.78524302 |
| TCGA-AA-3514 | COAD | High | 0  | 0  | 0 | 2526  | 37.0938 | 40.0983 | 1.08099736 |
| TCGA-A6-2680 | COAD | High | 0  | 0  | 0 | 510   | 34.2372 | 49.8693 | 1.45658231 |
| TCGA-LN-A49L | ESCA | Low  | 15 | 12 | 3 | 4016  | 3.9513  | 4.13468 | 1.04641004 |
| TCGA-L5-A4OH | ESCA | Low  | 9  | 7  | 2 | 4599  | 4.14519 | 4.56752 | 1.10188435 |
| TCGA-L5-A43I | ESCA | Low  | 8  | 6  | 2 | 3069  | 6.96479 | 6.59673 | 0.94715419 |
| TCGA-L7-A56G | ESCA | Low  | 7  | 6  | 1 | 4231  | 4.74389 | 4.41024 | 0.92966743 |
| TCGA-LN-A49R | ESCA | Low  | 7  | 5  | 2 | 3882  | 6.1031  | 6.55921 | 1.07473415 |
| TCGA-LN-A49V | ESCA | Low  | 7  | 7  | 0 | 4094  | 3.6197  | 4.42394 | 1.22218416 |
| TCGA-IG-A3YC | ESCA | Low  | 6  | 6  | 0 | 2410  | 4.02632 | 4.40538 | 1.09414552 |
| TCGA-LN-A49P | ESCA | Low  | 4  | 3  | 1 | 4038  | 7.07867 | 5.74772 | 0.81197739 |
| TCGA-L5-A43M | ESCA | Low  | 4  | 3  | 1 | 3962  | 4.54813 | 3.94342 | 0.86704206 |
| TCGA-LN-A49M | ESCA | Low  | 3  | 2  | 1 | 4170  | 5.19259 | 4.43586 | 0.85426733 |
| TCGA-IG-A3I8 | ESCA | Low  | 3  | 0  | 3 | 1386  | 7.66806 | 7.19348 | 0.93810951 |
| TCGA-LN-A4A4 | ESCA | Low  | 3  | 2  | 1 | 3978  | 4.54014 | 4.45852 | 0.98202258 |
| TCGA-L5-A4OG | ESCA | Low  | 3  | 2  | 1 | 4005  | 4.41442 | 4.45289 | 1.00871462 |
| TCGA-IG-A51D | ESCA | Low  | 3  | 2  | 1 | 2556  | 5.41114 | 5.51517 | 1.01922515 |
| TCGA-LN-A49U | ESCA | Low  | 3  | 3  | 0 | 3790  | 3.94703 | 4.07201 | 1.03166432 |
| TCGA-IG-A3YB | ESCA | Low  | 3  | 3  | 0 | 2719  | 4.55972 | 4.80994 | 1.05487618 |
| TCGA-LN-A4A3 | ESCA | Low  | 3  | 3  | 0 | 4043  | 4.29523 | 4.96702 | 1.15640373 |
| TCGA-L5-A43H | ESCA | Low  | 2  | 1  | 1 | 2943  | 7.24884 | 6.95668 | 0.95969562 |
| TCGA-LN-A49N | ESCA | Low  | 2  | 1  | 1 | 4164  | 6.94998 | 6.86244 | 0.98740428 |
| TCGA-IG-A3Y9 | ESCA | Low  | 2  | 2  | 0 | 2782  | 6.83828 | 6.77849 | 0.99125657 |

|              |      |      |    |    |    |      |         |         |            |
|--------------|------|------|----|----|----|------|---------|---------|------------|
| TCGA-IG-A3YA | ESCA | Low  | 2  | 1  | 1  | 2315 | 7.08418 | 7.08344 | 0.99989554 |
| TCGA-L5-A4OP | ESCA | Low  | 2  | 2  | 0  | 4508 | 4.87639 | 4.9355  | 1.01212167 |
| TCGA-LN-A4A2 | ESCA | Low  | 2  | 1  | 1  | 4057 | 5.05746 | 5.66684 | 1.12049131 |
| TCGA-LN-A49K | ESCA | Low  | 1  | 1  | 0  | 4166 | 4.25178 | 4.67548 | 1.09965238 |
| TCGA-L5-A43C | ESCA | Low  | 1  | 1  | 0  | 2973 | 4.08796 | 4.90449 | 1.19974021 |
| TCGA-14-1823 | GBM  | High | 42 | 41 | 1  | 1672 | 33.9329 | 33.7194 | 0.99370817 |
| TCGA-02-2483 | GBM  | High | 22 | 20 | 2  | 1864 | 36.2966 | 34.1848 | 0.94181824 |
| TCGA-26-1438 | GBM  | High | 20 | 19 | 1  | 1517 | 24.8533 | 33.9034 | 1.36414078 |
| TCGA-14-1459 | GBM  | High | 20 | 17 | 3  | 1806 | 29.5629 | 42.1796 | 1.42677478 |
| TCGA-19-2624 | GBM  | High | 15 | 4  | 11 | 1586 | 36.3454 | 32.0488 | 0.88178422 |
| TCGA-06-0686 | GBM  | High | 14 | 7  | 7  | 1420 | 32.6454 | 36.2282 | 1.109749   |
| TCGA-06-0157 | GBM  | High | 12 | 6  | 6  | 1463 | 34.5542 | 34.3875 | 0.9951757  |
| TCGA-06-2557 | GBM  | High | 9  | 6  | 3  | 1752 | 37.1629 | 31.3386 | 0.84327649 |
| TCGA-32-1970 | GBM  | Low  | 8  | 2  | 6  | 1699 | 41.2073 | 28.6029 | 0.69412216 |
| TCGA-14-2554 | GBM  | High | 8  | 7  | 1  | 1630 | 36.4375 | 33.6425 | 0.92329331 |
| TCGA-14-1401 | GBM  | High | 8  | 4  | 4  | 1830 | 27.0782 | 45.0115 | 1.66227814 |
| TCGA-02-2485 | GBM  | High | 7  | 2  | 5  | 2028 | 30.3666 | 35.7609 | 1.17763925 |
| TCGA-06-0211 | GBM  | High | 7  | 0  | 7  | 1386 | 47.8478 | 67.4342 | 1.40934797 |
| TCGA-06-0210 | GBM  | High | 6  | 2  | 4  | 1427 | 39.2527 | 64.1547 | 1.63440222 |
| TCGA-06-0152 | GBM  | High | 5  | 0  | 5  | 1691 | 33.6232 | 37.8422 | 1.12547884 |
| TCGA-14-1402 | GBM  | High | 5  | 2  | 3  | 1924 | 38.3632 | 63.8457 | 1.66424334 |
| TCGA-06-0145 | GBM  | High | 4  | 0  | 4  | 1807 | 49.4541 | 50.3767 | 1.01865568 |
| TCGA-16-1063 | GBM  | High | 4  | 1  | 3  | 1608 | 27.0706 | 33.1661 | 1.22517048 |
| TCGA-27-2528 | GBM  | High | 3  | 2  | 1  | 1496 | 36.0952 | 33.1672 | 0.91888118 |
| TCGA-06-0214 | GBM  | High | 3  | 0  | 3  | 1353 | 36.0054 | 37.6837 | 1.04661245 |
| TCGA-27-2523 | GBM  | High | 3  | 2  | 1  | 1498 | 31.7731 | 34.91   | 1.09872817 |
| TCGA-06-0744 | GBM  | High | 3  | 1  | 2  | 1407 | 32.4039 | 36.2275 | 1.11799814 |
| TCGA-06-0155 | GBM  | High | 3  | 0  | 3  | 1696 | 28.8936 | 39.57   | 1.36950743 |
| TCGA-06-0648 | GBM  | High | 2  | 1  | 1  | 1335 | 56.0269 | 35.2409 | 0.62899964 |
| TCGA-06-0745 | GBM  | High | 2  | 0  | 2  | 1409 | 35.1888 | 31.5379 | 0.89624824 |
| TCGA-06-2570 | GBM  | High | 2  | 0  | 2  | 1743 | 34.6221 | 34.2779 | 0.99005837 |
| TCGA-06-0185 | GBM  | High | 2  | 0  | 2  | 1434 | 28.4769 | 30.0616 | 1.05564861 |
| TCGA-19-2620 | GBM  | High | 2  | 0  | 2  | 1601 | 32.1063 | 37.1932 | 1.15843931 |
| TCGA-14-0786 | GBM  | High | 2  | 0  | 2  | 1738 | 27.9751 | 34.9217 | 1.24831368 |
| TCGA-06-0881 | GBM  | High | 1  | 0  | 1  | 1414 | 28.7442 | 30.6738 | 1.06713006 |
| TCGA-27-1831 | GBM  | High | 1  | 0  | 1  | 1513 | 33.6285 | 36.3224 | 1.08010765 |
| TCGA-06-0125 | GBM  | High | 1  | 0  | 1  | 1982 | 42.9763 | 68.6988 | 1.59852756 |
| TCGA-CN-6013 | HNSC | Low  | 30 | 29 | 1  | 4089 | 6.60373 | 4.72112 | 0.71491718 |
| TCGA-BA-4076 | HNSC | High | 16 | 6  | 10 | 5159 | 31.202  | 57.3144 | 1.83688225 |
| TCGA-DQ-5631 | HNSC | Low  | 9  | 9  | 0  | 4750 | 8.23585 | 7.18133 | 0.87195979 |
| TCGA-CV-7414 | HNSC | Low  | 8  | 7  | 1  | 4819 | 6.14035 | 5.68714 | 0.9261915  |
| TCGA-BA-4078 | HNSC | Low  | 7  | 6  | 1  | 5136 | 6.41619 | 6.31973 | 0.98496616 |
| TCGA-CN-5367 | HNSC | Low  | 7  | 3  | 4  | 4876 | 5.66102 | 5.60548 | 0.99018905 |
| TCGA-CV-6441 | HNSC | Low  | 6  | 3  | 3  | 4678 | 6.21109 | 6.1     | 0.98211425 |
| TCGA-CN-4742 | HNSC | Low  | 6  | 2  | 4  | 5049 | 6.71515 | 6.70046 | 0.99781241 |
| TCGA-CV-5973 | HNSC | Low  | 6  | 3  | 3  | 4479 | 6.06815 | 7.8012  | 1.28559775 |
| TCGA-CV-5431 | HNSC | High | 6  | 2  | 4  | 4456 | 42.8057 | 63.2425 | 1.47743174 |
| TCGA-BA-4075 | HNSC | Low  | 5  | 4  | 1  | 3716 | 5.16072 | 3.63685 | 0.70471756 |
| TCGA-CV-6960 | HNSC | Low  | 5  | 4  | 1  | 4753 | 7.83782 | 5.67338 | 0.72384668 |
| TCGA-CV-6948 | HNSC | Low  | 5  | 1  | 4  | 4670 | 8.99984 | 7.68966 | 0.85442186 |
| TCGA-CV-7407 | HNSC | Low  | 5  | 4  | 1  | 4877 | 6.18517 | 5.2923  | 0.85564342 |
| TCGA-CV-6933 | HNSC | Low  | 5  | 4  | 1  | 4701 | 7.07592 | 6.61606 | 0.93501057 |
| TCGA-BB-4224 | HNSC | Low  | 5  | 4  | 1  | 4623 | 5.66875 | 5.52721 | 0.97503153 |
| TCGA-CN-4727 | HNSC | Low  | 5  | 4  | 1  | 4243 | 5.58448 | 5.80759 | 1.0399518  |
| TCGA-CV-7091 | HNSC | Low  | 5  | 2  | 3  | 4742 | 8.45729 | 8.98541 | 1.06244554 |
| TCGA-CQ-6225 | HNSC | High | 5  | 1  | 4  | 4532 | 43.0818 | 65.2878 | 1.51543807 |
| TCGA-CN-4737 | HNSC | High | 5  | 1  | 4  | 4331 | 35.1049 | 81.0125 | 2.30772627 |

|              |      |      |    |    |   |      |         |         |            |
|--------------|------|------|----|----|---|------|---------|---------|------------|
| TCGA-CV-7434 | HNSC | Low  | 4  | 3  | 1 | 4985 | 6.17304 | 4.56015 | 0.73872031 |
| TCGA-CN-4729 | HNSC | Low  | 4  | 3  | 1 | 4022 | 6.41823 | 5.47577 | 0.85315889 |
| TCGA-CN-4740 | HNSC | Low  | 4  | 3  | 1 | 4265 | 6.40699 | 5.84318 | 0.9120008  |
| TCGA-CV-6954 | HNSC | Low  | 4  | 4  | 0 | 4662 | 8.44326 | 7.71738 | 0.91402847 |
| TCGA-CV-7178 | HNSC | Low  | 4  | 3  | 1 | 4705 | 7.28632 | 7.61797 | 1.0455168  |
| TCGA-DQ-5624 | HNSC | Low  | 4  | 4  | 0 | 4901 | 6.2168  | 7.92576 | 1.27489384 |
| TCGA-CN-4735 | HNSC | Low  | 4  | 3  | 1 | 4551 | 3.7504  | 5.01174 | 1.33632146 |
| TCGA-D6-6826 | HNSC | Low  | 3  | 1  | 2 | 4937 | 6.69375 | 4.54548 | 0.67906331 |
| TCGA-CV-7247 | HNSC | Low  | 3  | 3  | 0 | 4813 | 6.7279  | 4.82701 | 0.71746162 |
| TCGA-CN-4725 | HNSC | Low  | 3  | 3  | 0 | 4455 | 6.23496 | 4.94541 | 0.7931743  |
| TCGA-CV-6959 | HNSC | Low  | 3  | 2  | 1 | 4643 | 8.77643 | 7.05    | 0.8032879  |
| TCGA-CN-4741 | HNSC | Low  | 3  | 3  | 0 | 5340 | 6.45467 | 5.34989 | 0.8288402  |
| TCGA-CV-6945 | HNSC | Low  | 3  | 2  | 1 | 4799 | 7.22368 | 6.12774 | 0.84828509 |
| TCGA-IQ-7632 | HNSC | Low  | 3  | 2  | 1 | 4782 | 6.54978 | 6.05368 | 0.924257   |
| TCGA-BA-4077 | HNSC | Low  | 3  | 3  | 0 | 4612 | 6.80999 | 6.35154 | 0.93267978 |
| TCGA-CN-5363 | HNSC | Low  | 3  | 3  | 0 | 4884 | 7.09098 | 6.6967  | 0.94439697 |
| TCGA-CV-5976 | HNSC | Low  | 3  | 1  | 2 | 4433 | 6.73592 | 6.59146 | 0.97855378 |
| TCGA-BA-4074 | HNSC | Low  | 3  | 1  | 2 | 2428 | 6.21806 | 6.18348 | 0.99443878 |
| TCGA-CN-4733 | HNSC | Low  | 3  | 1  | 2 | 4023 | 5.87566 | 6.04788 | 1.02931075 |
| TCGA-CV-5977 | HNSC | Low  | 3  | 1  | 2 | 4373 | 7.5293  | 8.63523 | 1.14688351 |
| TCGA-CV-6003 | HNSC | Low  | 3  | 1  | 2 | 4390 | 7.01506 | 8.26429 | 1.17807831 |
| TCGA-CV-7095 | HNSC | Low  | 3  | 3  | 0 | 4727 | 6.03014 | 7.94875 | 1.31817006 |
| TCGA-CQ-5329 | HNSC | Low  | 2  | 1  | 1 | 4425 | 6.18233 | 4.47592 | 0.72398594 |
| TCGA-CN-5360 | HNSC | Low  | 2  | 2  | 0 | 4967 | 7.10898 | 6.31048 | 0.88767728 |
| TCGA-CV-7432 | HNSC | Low  | 2  | 2  | 0 | 4832 | 6.15919 | 5.78152 | 0.93868187 |
| TCGA-CV-7428 | HNSC | Low  | 2  | 0  | 2 | 4849 | 7.78876 | 7.47035 | 0.9591193  |
| TCGA-CN-6018 | HNSC | Low  | 2  | 0  | 2 | 4085 | 5.84955 | 5.98094 | 1.02246156 |
| TCGA-CN-6998 | HNSC | Low  | 2  | 2  | 0 | 4189 | 6.15947 | 7.55985 | 1.22735398 |
| TCGA-D6-6825 | HNSC | Low  | 1  | 1  | 0 | 4989 | 6.2798  | 4.01425 | 0.63923214 |
| TCGA-CQ-6223 | HNSC | Low  | 1  | 1  | 0 | 4399 | 9.11896 | 7.23857 | 0.79379337 |
| TCGA-CN-6996 | HNSC | Low  | 1  | 0  | 1 | 4053 | 8.16119 | 6.61642 | 0.81071756 |
| TCGA-BA-5555 | HNSC | Low  | 1  | 1  | 0 | 4950 | 7.11559 | 5.91858 | 0.83177642 |
| TCGA-BA-5151 | HNSC | Low  | 1  | 1  | 0 | 5080 | 5.05389 | 4.54791 | 0.89988306 |
| TCGA-CQ-6221 | HNSC | Low  | 1  | 0  | 1 | 4412 | 6.85895 | 7.68535 | 1.12048491 |
| TCGA-DQ-5625 | HNSC | High | 1  | 0  | 1 | 4891 | 41.7973 | 63.278  | 1.51392554 |
| TCGA-BA-5149 | HNSC | High | 1  | 0  | 1 | 5121 | 39.89   | 66.4631 | 1.66615944 |
| TCGA-CN-5364 | HNSC | Low  | 0  | 0  | 0 | 4884 | 6.68593 | 6.64169 | 0.99338312 |
| TCGA-DU-7010 | LGG  | Low  | 6  | 3  | 3 | 2778 | 5.10535 | 5.98653 | 1.17259933 |
| TCGA-CS-4941 | LGG  | Low  | 4  | 1  | 3 | 1106 | 7.88601 | 8.03473 | 1.01885871 |
| TCGA-DU-7292 | LGG  | Low  | 4  | 2  | 2 | 2562 | 4.7771  | 6.07652 | 1.27201022 |
| TCGA-DU-6403 | LGG  | Low  | 3  | 0  | 3 | 1466 | 6.34801 | 5.66441 | 0.89231271 |
| TCGA-FG-6688 | LGG  | Low  | 2  | 0  | 2 | 2483 | 4.78602 | 3.69161 | 0.77133192 |
| TCGA-DU-6405 | LGG  | Low  | 2  | 0  | 2 | 1283 | 7.05757 | 5.77964 | 0.81892776 |
| TCGA-DU-5852 | LGG  | Low  | 2  | 0  | 2 | 1413 | 6.62502 | 6.34878 | 0.95830352 |
| TCGA-DU-7007 | LGG  | Low  | 1  | 1  | 0 | 3786 | 5.723   | 4.77758 | 0.83480343 |
| TCGA-DU-5854 | LGG  | Low  | 1  | 0  | 1 | 1393 | 6.35871 | 8.42518 | 1.32498258 |
| TCGA-05-4434 | LUAD | Low  | 53 | 53 | 0 | 4792 | 4.07561 | 3.51335 | 0.86204274 |
| TCGA-91-6831 | LUAD | Low  | 16 | 12 | 4 | 5182 | 8.75051 | 8.33814 | 0.95287475 |
| TCGA-91-6828 | LUAD | Low  | 16 | 16 | 0 | 5235 | 7.01798 | 6.96474 | 0.99241377 |
| TCGA-05-4422 | LUAD | High | 16 | 14 | 2 | 5430 | 39.7175 | 43.7451 | 1.10140618 |
| TCGA-50-5051 | LUAD | Low  | 16 | 16 | 0 | 4710 | 3.7514  | 5.30361 | 1.41376819 |
| TCGA-38-4629 | LUAD | Low  | 14 | 14 | 0 | 4912 | 4.78183 | 6.55577 | 1.37097513 |
| TCGA-64-5775 | LUAD | Low  | 13 | 13 | 0 | 4680 | 3.98368 | 4.6243  | 1.16081111 |
| TCGA-64-5778 | LUAD | Low  | 12 | 12 | 0 | 4596 | 4.10474 | 4.31633 | 1.05154772 |
| TCGA-50-6597 | LUAD | High | 11 | 5  | 6 | 4834 | 57.0463 | 59.6775 | 1.04612394 |
| TCGA-50-6591 | LUAD | High | 9  | 9  | 0 | 4767 | 50.2834 | 44.9323 | 0.89358118 |
| TCGA-05-4249 | LUAD | Low  | 9  | 9  | 0 | 1346 | 4.33862 | 5.35993 | 1.23539974 |

|              |      |      |    |    |    |      |         |         |            |
|--------------|------|------|----|----|----|------|---------|---------|------------|
| TCGA-05-4250 | LUAD | Low  | 8  | 8  | 0  | 1423 | 8.29501 | 5.25357 | 0.63334101 |
| TCGA-64-5774 | LUAD | Low  | 8  | 8  | 0  | 4742 | 6.07941 | 8.0892  | 1.33058965 |
| TCGA-38-4631 | LUAD | Low  | 7  | 7  | 0  | 4883 | 8.03222 | 6.72782 | 0.83760405 |
| TCGA-71-6725 | LUAD | Low  | 7  | 7  | 0  | 4777 | 7.25532 | 7.35947 | 1.01435498 |
| TCGA-05-4390 | LUAD | Low  | 7  | 7  | 0  | 2984 | 5.721   | 7.61013 | 1.33020975 |
| TCGA-05-4397 | LUAD | High | 6  | 6  | 0  | 6584 | 30.7135 | 30.7736 | 1.00195679 |
| TCGA-91-6829 | LUAD | Low  | 6  | 6  | 0  | 5314 | 7.14694 | 9.4071  | 1.31624164 |
| TCGA-05-4426 | LUAD | Low  | 6  | 6  | 0  | 5244 | 2.84684 | 3.78459 | 1.32940032 |
| TCGA-49-4510 | LUAD | High | 6  | 4  | 2  | 4960 | 28.0055 | 38.0966 | 1.36032565 |
| TCGA-49-4486 | LUAD | High | 5  | 5  | 0  | 4903 | 32.8174 | 32.456  | 0.98898755 |
| TCGA-05-4396 | LUAD | High | 5  | 2  | 3  | 4883 | 31.9344 | 38.9769 | 1.22053021 |
| TCGA-64-5779 | LUAD | Low  | 5  | 5  | 0  | 4834 | 3.00107 | 4.61903 | 1.53912771 |
| TCGA-38-4628 | LUAD | High | 5  | 2  | 3  | 5163 | 31.5651 | 77.0075 | 2.43964062 |
| TCGA-75-5146 | LUAD | Low  | 4  | 4  | 0  | 5160 | 9.04152 | 1.80851 | 0.20002278 |
| TCGA-50-5944 | LUAD | Low  | 4  | 2  | 2  | 4709 | 4.90365 | 3.22326 | 0.65731853 |
| TCGA-05-4395 | LUAD | High | 4  | 4  | 0  | 5264 | 31.8885 | 35.389  | 1.10977312 |
| TCGA-49-6767 | LUAD | Low  | 4  | 3  | 1  | 5007 | 3.26321 | 4.11182 | 1.26005375 |
| TCGA-50-5931 | LUAD | Low  | 4  | 4  | 0  | 4717 | 5.55351 | 8.0858  | 1.45598009 |
| TCGA-44-6774 | LUAD | Low  | 3  | 2  | 1  | 4968 | 6.49702 | 3.35154 | 0.51585804 |
| TCGA-05-4427 | LUAD | Low  | 3  | 3  | 0  | 5481 | 8.57482 | 5.70603 | 0.66544021 |
| TCGA-50-6594 | LUAD | Low  | 3  | 2  | 1  | 4720 | 6.52364 | 4.81073 | 0.73743033 |
| TCGA-44-6778 | LUAD | Low  | 3  | 3  | 0  | 4904 | 6.69534 | 5.2782  | 0.78833935 |
| TCGA-73-4662 | LUAD | Low  | 3  | 2  | 1  | 4767 | 4.73846 | 4.53218 | 0.95646687 |
| TCGA-05-4402 | LUAD | Low  | 3  | 3  | 0  | 6136 | 2.50672 | 3.21307 | 1.28178257 |
| TCGA-05-4433 | LUAD | Low  | 3  | 2  | 1  | 5413 | 3.94856 | 5.92339 | 1.50013929 |
| TCGA-35-4123 | LUAD | Low  | 2  | 2  | 0  | 4916 | 4.4227  | 2.0525  | 0.46408303 |
| TCGA-75-5122 | LUAD | Low  | 2  | 2  | 0  | 4830 | 6.39508 | 4.69265 | 0.73379066 |
| TCGA-05-4398 | LUAD | High | 2  | 2  | 0  | 6417 | 56.4707 | 44.0585 | 0.78020106 |
| TCGA-49-4501 | LUAD | Low  | 2  | 2  | 0  | 4955 | 3.33475 | 2.78498 | 0.83513907 |
| TCGA-38-4632 | LUAD | Low  | 2  | 2  | 0  | 4836 | 9.46285 | 7.9818  | 0.84348796 |
| TCGA-44-6779 | LUAD | Low  | 2  | 2  | 0  | 4935 | 6.57743 | 5.77342 | 0.87776229 |
| TCGA-50-5939 | LUAD | Low  | 2  | 1  | 1  | 4686 | 8.05641 | 7.42138 | 0.92117705 |
| TCGA-44-6145 | LUAD | Low  | 2  | 2  | 0  | 4971 | 5.23517 | 4.92634 | 0.9410086  |
| TCGA-91-6836 | LUAD | Low  | 2  | 2  | 0  | 5330 | 7.348   | 7.25038 | 0.98671475 |
| TCGA-49-4507 | LUAD | Low  | 2  | 2  | 0  | 4931 | 4.41787 | 4.66046 | 1.05491108 |
| TCGA-50-5935 | LUAD | Low  | 2  | 2  | 0  | 4680 | 5.49258 | 5.8029  | 1.05649804 |
| TCGA-49-6745 | LUAD | Low  | 2  | 2  | 0  | 4992 | 4.97426 | 5.40534 | 1.08666214 |
| TCGA-05-4405 | LUAD | Low  | 2  | 2  | 0  | 5905 | 5.72576 | 7.0642  | 1.23375762 |
| TCGA-49-4488 | LUAD | Low  | 2  | 2  | 0  | 4984 | 5.18192 | 6.6339  | 1.28020116 |
| TCGA-05-4382 | LUAD | Low  | 1  | 0  | 1  | 1544 | 4.43781 | 3.9281  | 0.8851438  |
| TCGA-50-5933 | LUAD | Low  | 1  | 1  | 0  | 4700 | 6.06496 | 5.59163 | 0.92195662 |
| TCGA-73-4668 | LUAD | Low  | 1  | 1  | 0  | 4764 | 4.21858 | 3.89829 | 0.92407635 |
| TCGA-44-5643 | LUAD | Low  | 1  | 1  | 0  | 5021 | 7.10981 | 6.601   | 0.9284355  |
| TCGA-05-4432 | LUAD | High | 1  | 0  | 1  | 5430 | 31.1489 | 41.3211 | 1.32656691 |
| TCGA-44-2661 | LUAD | Low  | 0  | 0  | 0  | 4836 | 4.42554 | 1.74017 | 0.39321077 |
| TCGA-44-3919 | LUAD | Low  | 0  | 0  | 0  | 4836 | 4.23506 | 2.95274 | 0.69721326 |
| TCGA-05-5429 | LUAD | Low  | 0  | 0  | 0  | 4792 | 31.7302 | 25.6875 | 0.80955998 |
| TCGA-55-6712 | LUAD | Low  | 0  | 0  | 0  | 4834 | 5.82688 | 6.67959 | 1.14634075 |
| TCGA-44-6144 | LUAD | Low  | 0  | 0  | 0  | 5021 | 5.32817 | 6.12483 | 1.1495185  |
| TCGA-05-4424 | LUAD | Low  | 0  | 0  | 0  | 5430 | 4.69817 | 5.60279 | 1.19254731 |
| TCGA-37-4135 | LUSC | High | 21 | 14 | 7  | 6675 | 34.7839 | 54.5588 | 1.56850727 |
| TCGA-66-2756 | LUSC | High | 18 | 5  | 13 | 6167 | 39.7907 | 37.9668 | 0.95416266 |
| TCGA-66-2766 | LUSC | High | 17 | 6  | 11 | 5946 | 40.6694 | 45.3999 | 1.11631595 |
| TCGA-60-2711 | LUSC | High | 15 | 10 | 5  | 6503 | 50.088  | 45.6577 | 0.91154967 |
| TCGA-66-2759 | LUSC | High | 15 | 2  | 13 | 5829 | 48.6407 | 61.4488 | 1.26332064 |
| TCGA-66-2793 | LUSC | High | 12 | 6  | 6  | 5923 | 33.2448 | 70.3555 | 2.11628586 |
| TCGA-60-2726 | LUSC | High | 11 | 6  | 5  | 6488 | 71.2844 | 80.033  | 1.12272811 |

|              |      |      |    |    |    |       |         |         |            |
|--------------|------|------|----|----|----|-------|---------|---------|------------|
| TCGA-66-2744 | LUSC | High | 11 | 6  | 5  | 6309  | 48.9795 | 61.9003 | 1.26380016 |
| TCGA-66-2795 | LUSC | High | 11 | 2  | 9  | 5720  | 33.5774 | 57.9101 | 1.72467493 |
| TCGA-56-1622 | LUSC | High | 10 | 5  | 5  | 7060  | 38.9134 | 40.9048 | 1.05117517 |
| TCGA-60-2719 | LUSC | High | 10 | 4  | 6  | 6249  | 25.3476 | 54.2438 | 2.13999748 |
| TCGA-43-3394 | LUSC | High | 9  | 5  | 4  | 7054  | 42.8582 | 43.7056 | 1.01977218 |
| TCGA-22-5477 | LUSC | High | 9  | 4  | 5  | 6671  | 42.6569 | 54.4448 | 1.27634216 |
| TCGA-60-2722 | LUSC | High | 8  | 5  | 3  | 6903  | 40.9497 | 40.3839 | 0.98618305 |
| TCGA-34-2600 | LUSC | High | 7  | 5  | 2  | 7126  | 57.8445 | 37.0725 | 0.64089931 |
| TCGA-18-3408 | LUSC | High | 6  | 2  | 4  | 7526  | 34.0157 | 66.7828 | 1.96329342 |
| TCGA-60-2713 | LUSC | High | 5  | 1  | 4  | 6403  | 48.7735 | 43.2861 | 0.88749218 |
| TCGA-22-1016 | LUSC | High | 5  | 3  | 2  | 7262  | 38.4691 | 62.5559 | 1.6261337  |
| TCGA-22-5492 | LUSC | High | 5  | 2  | 3  | 6235  | 32.9692 | 77.6952 | 2.35659949 |
| TCGA-60-2695 | LUSC | High | 4  | 4  | 0  | 7238  | 38.1494 | 36.0003 | 0.94366622 |
| TCGA-21-1082 | LUSC | High | 4  | 4  | 0  | 9472  | 43.544  | 52.1929 | 1.19862438 |
| TCGA-60-2724 | LUSC | High | 4  | 1  | 3  | 6740  | 45.6463 | 57.5445 | 1.26066078 |
| TCGA-60-2698 | LUSC | High | 4  | 1  | 3  | 7053  | 32.3818 | 58.6675 | 1.81174302 |
| TCGA-33-4586 | LUSC | High | 4  | 1  | 3  | 5905  | 36.4156 | 67.41   | 1.85112974 |
| TCGA-43-3920 | LUSC | High | 4  | 1  | 3  | 6963  | 32.7467 | 66.5395 | 2.0319452  |
| TCGA-18-3415 | LUSC | High | 3  | 0  | 3  | 5039  | 36.179  | 70.8676 | 1.95880483 |
| TCGA-21-5782 | LUSC | High | 3  | 1  | 2  | 8383  | 32.0813 | 78.1044 | 2.43457715 |
| TCGA-66-2789 | LUSC | High | 2  | 0  | 2  | 5913  | 35.1066 | 78.5493 | 2.23745108 |
| TCGA-21-1076 | LUSC | High | 1  | 1  | 0  | 7182  | 36.0598 | 49.0976 | 1.36156052 |
| TCGA-18-4721 | LUSC | High | 1  | 0  | 1  | 7849  | 43.2168 | 65.5462 | 1.51668333 |
| TCGA-25-2400 | OV   | High | 23 | 19 | 4  | 6639  | 41.8171 | 67.423  | 1.61233084 |
| TCGA-61-2000 | OV   | High | 20 | 3  | 17 | 6119  | 27.8697 | 57.1242 | 2.04968837 |
| TCGA-25-1319 | OV   | High | 17 | 9  | 8  | 7196  | 38.5099 | 37.7929 | 0.98138141 |
| TCGA-24-1466 | OV   | High | 14 | 1  | 13 | 7728  | 37.5705 | 72.3061 | 1.92454452 |
| TCGA-10-0938 | OV   | High | 12 | 10 | 2  | 10773 | 38.5215 | 57.5127 | 1.49300261 |
| TCGA-24-1103 | OV   | High | 11 | 6  | 5  | 9086  | 35.3703 | 30.2976 | 0.85658307 |
| TCGA-13-0723 | OV   | High | 10 | 8  | 2  | 10305 | 28.6533 | 34.377  | 1.1997571  |
| TCGA-24-1552 | OV   | High | 9  | 3  | 6  | 7648  | 29.3678 | 57.5464 | 1.95950667 |
| TCGA-04-1349 | OV   | High | 8  | 6  | 2  | 15756 | 29.5439 | 55.8504 | 1.8904207  |
| TCGA-24-0982 | OV   | High | 6  | 5  | 1  | 9892  | 33.7062 | 35.6802 | 1.05856489 |
| TCGA-04-1371 | OV   | High | 6  | 3  | 3  | 12994 | 38.2273 | 40.7826 | 1.0668449  |
| TCGA-24-1419 | OV   | High | 6  | 2  | 4  | 8674  | 29.7056 | 57.2243 | 1.92638088 |
| TCGA-04-1514 | OV   | High | 6  | 2  | 4  | 11687 | 27.2534 | 56.3295 | 2.06687973 |
| TCGA-13-1491 | OV   | High | 5  | 3  | 2  | 10607 | 39.8192 | 69.033  | 1.73366115 |
| TCGA-04-1347 | OV   | High | 5  | 3  | 2  | 4235  | 27.6534 | 54.3183 | 1.96425394 |
| TCGA-09-2050 | OV   | High | 4  | 4  | 0  | 10150 | 41.2705 | 63.494  | 1.53848391 |
| TCGA-24-1614 | OV   | High | 4  | 2  | 2  | 7511  | 40.7315 | 66.0445 | 1.62146005 |
| TCGA-13-0912 | OV   | High | 4  | 1  | 3  | 11035 | 39.2273 | 68.066  | 1.73516913 |
| TCGA-13-0727 | OV   | High | 3  | 2  | 1  | 11366 | 38.6019 | 68.4345 | 1.77282724 |
| TCGA-04-1542 | OV   | High | 3  | 3  | 0  | 10691 | 36.1864 | 67.8432 | 1.8748259  |
| TCGA-23-1110 | OV   | High | 2  | 1  | 1  | 10358 | 30.548  | 58.8524 | 1.92655493 |
| TCGA-10-0937 | OV   | High | 2  | 2  | 0  | 11584 | 27.2594 | 55.9313 | 2.05181699 |
| TCGA-10-0934 | OV   | High | 1  | 0  | 1  | 9843  | 41.1559 | 63.9362 | 1.55351238 |
| TCGA-24-2290 | OV   | High | 1  | 0  | 1  | 7449  | 28.1702 | 51.6794 | 1.83454147 |
| TCGA-25-2391 | OV   | High | 1  | 1  | 0  | 7147  | 28.7982 | 55.0091 | 1.91015758 |
| TCGA-24-2024 | OV   | High | 0  | 0  | 0  | 7511  | 29.4431 | 53.2112 | 1.80725535 |
| TCGA-EJ-5525 | PRAD | Low  | 13 | 13 | 0  | 5963  | 8.71505 | 6.84673 | 0.78562143 |
| TCGA-EJ-5532 | PRAD | Low  | 11 | 11 | 0  | 5171  | 9.03364 | 7.80275 | 0.86374374 |
| TCGA-G9-6496 | PRAD | Low  | 6  | 6  | 0  | 5477  | 4.38378 | 4.88449 | 1.11421878 |
| TCGA-EJ-5514 | PRAD | Low  | 5  | 3  | 2  | 4926  | 9.44957 | 8.66987 | 0.91748831 |
| TCGA-EJ-5498 | PRAD | Low  | 5  | 5  | 0  | 5395  | 7.79111 | 7.79462 | 1.00045051 |
| TCGA-CH-5761 | PRAD | Low  | 5  | 2  | 3  | 3236  | 8.54408 | 9.03692 | 1.05768204 |
| TCGA-EJ-5495 | PRAD | Low  | 4  | 3  | 1  | 4212  | 8.35985 | 8.6415  | 1.0336908  |
| TCGA-CH-5751 | PRAD | Low  | 3  | 2  | 1  | 2200  | 7.67934 | 7.45015 | 0.97015499 |

|              |      |      |     |     |    |      |         |         |            |
|--------------|------|------|-----|-----|----|------|---------|---------|------------|
| TCGA-HC-7213 | PRAD | Low  | 3   | 1   | 2  | 5699 | 6.90928 | 7.48678 | 1.08358324 |
| TCGA-EJ-5516 | PRAD | Low  | 2   | 1   | 1  | 5205 | 9.15289 | 6.6925  | 0.73118982 |
| TCGA-EJ-5530 | PRAD | Low  | 2   | 2   | 0  | 5794 | 9.04404 | 7.76187 | 0.85823039 |
| TCGA-EJ-5508 | PRAD | Low  | 2   | 2   | 0  | 5136 | 8.52342 | 7.45298 | 0.87441191 |
| TCGA-CH-5792 | PRAD | Low  | 2   | 1   | 1  | 3511 | 8.14883 | 7.25919 | 0.89082605 |
| TCGA-EJ-5519 | PRAD | Low  | 2   | 1   | 1  | 5106 | 7.7727  | 7.08757 | 0.91185431 |
| TCGA-EJ-5507 | PRAD | Low  | 2   | 2   | 0  | 5251 | 8.73554 | 8.31812 | 0.95221589 |
| TCGA-EJ-5497 | PRAD | Low  | 2   | 2   | 0  | 5903 | 7.48749 | 7.36516 | 0.98366208 |
| TCGA-EJ-5496 | PRAD | Low  | 1   | 1   | 0  | 4182 | 9.27602 | 8.26159 | 0.89063952 |
| TCGA-EJ-5531 | PRAD | Low  | 1   | 0   | 1  | 5816 | 8.36558 | 8.55572 | 1.02272885 |
| TCGA-CH-5788 | PRAD | High | 1   | 1   | 0  | 3498 | 34.439  | 65.6011 | 1.90484915 |
| TCGA-EJ-5503 | PRAD | High | 0   | 0   | 0  | 5395 | 34.0797 | 57.3221 | 1.68200131 |
| TCGA-AG-A00Y | READ | Low  | 190 | 190 | 0  | 1484 | 3.35359 | 4.75994 | 1.41935657 |
| TCGA-AG-3898 | READ | Low  | 8   | 8   | 0  | 6615 | 1.88339 | 1.98091 | 1.05177897 |
| TCGA-AG-3999 | READ | Low  | 6   | 6   | 0  | 4601 | 4.40275 | 3.68813 | 0.83768781 |
| TCGA-AG-A020 | READ | Low  | 5   | 5   | 0  | 1560 | 3.18731 | 3.3971  | 1.06582039 |
| TCGA-AG-3881 | READ | Low  | 4   | 4   | 0  | 4041 | 2.35838 | 2.3064  | 0.97795945 |
| TCGA-AG-4015 | READ | High | 4   | 4   | 0  | 8161 | 30.5395 | 44.7698 | 1.46596375 |
| TCGA-AG-A01Y | READ | Low  | 3   | 2   | 1  | 1496 | 2.88592 | 2.5429  | 0.88114016 |
| TCGA-AG-4005 | READ | Low  | 2   | 2   | 0  | 8597 | 2.64886 | 3.54885 | 1.33976503 |
| TCGA-AG-3902 | READ | Low  | 1   | 1   | 0  | 6207 | 3.89112 | 3.8734  | 0.99544604 |
| TCGA-ER-A19T | SKCM | Low  | 37  | 14  | 23 | 4443 | 34.732  | 29.8597 | 0.85971726 |
| TCGA-ER-A19L | SKCM | High | 13  | 12  | 1  | 4368 | 37.305  | 70.5193 | 1.89034446 |
| TCGA-FS-A1ZJ | SKCM | Low  | 12  | 12  | 0  | 4119 | 7.44597 | 4.94126 | 0.66361535 |
| TCGA-D3-A3CC | SKCM | Low  | 12  | 11  | 1  | 5597 | 4.66648 | 3.59247 | 0.76984579 |
| TCGA-D9-A1X3 | SKCM | Low  | 11  | 10  | 1  | 4771 | 3.09427 | 3.75875 | 1.21474532 |
| TCGA-FS-A1ZE | SKCM | Low  | 10  | 10  | 0  | 4432 | 4.35997 | 5.09843 | 1.16937273 |
| TCGA-FS-A1ZK | SKCM | High | 9   | 9   | 0  | 4137 | 36.9891 | 33.5486 | 0.90698611 |
| TCGA-D3-A1Q9 | SKCM | Low  | 8   | 8   | 0  | 5025 | 5.02545 | 4.83046 | 0.9611995  |
| TCGA-ER-A19E | SKCM | High | 8   | 4   | 4  | 4552 | 36.5853 | 36.9362 | 1.00959128 |
| TCGA-D3-A2J6 | SKCM | Low  | 7   | 6   | 1  | 3663 | 5.78017 | 3.76382 | 0.65116078 |
| TCGA-FS-A1ZG | SKCM | Low  | 6   | 4   | 2  | 4310 | 7.09854 | 4.91232 | 0.69201836 |
| TCGA-EB-A24C | SKCM | Low  | 6   | 6   | 0  | 4866 | 6.08127 | 4.74734 | 0.78064944 |
| TCGA-EE-A2MI | SKCM | High | 6   | 4   | 2  | 4650 | 34.3095 | 31.6368 | 0.92210029 |
| TCGA-ER-A197 | SKCM | Low  | 5   | 3   | 2  | 4217 | 7.69362 | 2.70548 | 0.35165241 |
| TCGA-EE-A2GR | SKCM | Low  | 5   | 3   | 2  | 4504 | 7.13759 | 7.63103 | 1.06913258 |
| TCGA-EE-A2OH | SKCM | Low  | 5   | 4   | 1  | 4651 | 7.28224 | 8.47011 | 1.16311877 |
| TCGA-EE-A2MH | SKCM | Low  | 5   | 4   | 1  | 4795 | 4.78673 | 5.84874 | 1.22186545 |
| TCGA-EE-A2MS | SKCM | Low  | 4   | 3   | 1  | 4435 | 4.16969 | 3.69311 | 0.88570373 |
| TCGA-D3-A2JC | SKCM | Low  | 4   | 3   | 1  | 5475 | 5.25865 | 5.03209 | 0.9569167  |
| TCGA-EE-A2MN | SKCM | Low  | 4   | 3   | 1  | 4507 | 5.27622 | 5.24567 | 0.99420987 |
| TCGA-FS-A1ZP | SKCM | High | 4   | 2   | 2  | 4488 | 34.4929 | 37.6363 | 1.0911318  |
| TCGA-EE-A2MT | SKCM | Low  | 4   | 2   | 2  | 4335 | 2.08636 | 3.47255 | 1.66440595 |
| TCGA-FS-A1ZQ | SKCM | Low  | 3   | 2   | 1  | 4445 | 7.71495 | 4.33625 | 0.56205808 |
| TCGA-EE-A29D | SKCM | Low  | 3   | 3   | 0  | 4545 | 5.27605 | 4.92949 | 0.9343145  |
| TCGA-FS-A1ZT | SKCM | Low  | 3   | 3   | 0  | 4446 | 5.5056  | 5.19463 | 0.94351751 |
| TCGA-EE-A2M6 | SKCM | Low  | 3   | 2   | 1  | 4349 | 6.00772 | 5.67025 | 0.94382728 |
| TCGA-ER-A193 | SKCM | Low  | 2   | 1   | 1  | 4295 | 4.11764 | 3.58842 | 0.87147492 |
| TCGA-EE-A29H | SKCM | Low  | 2   | 2   | 0  | 4748 | 4.36338 | 3.85514 | 0.88352149 |
| TCGA-D3-A3C3 | SKCM | Low  | 2   | 2   | 0  | 6172 | 5.08115 | 5.05403 | 0.99466263 |
| TCGA-GN-A266 | SKCM | High | 2   | 0   | 2  | 4415 | 30.1489 | 34.2368 | 1.13559035 |
| TCGA-FS-A1Z3 | SKCM | Low  | 2   | 1   | 1  | 4516 | 5.58518 | 7.81472 | 1.39918857 |
| TCGA-EE-A29E | SKCM | Low  | 1   | 1   | 0  | 4477 | 6.64989 | 4.16282 | 0.62599833 |
| TCGA-FS-A1ZM | SKCM | Low  | 1   | 0   | 1  | 4140 | 7.73651 | 5.79466 | 0.74900181 |
| TCGA-ER-A196 | SKCM | Low  | 1   | 1   | 0  | 4359 | 7.23564 | 7.12497 | 0.98470488 |
| TCGA-DA-A1I8 | SKCM | High | 1   | 1   | 0  | 4862 | 32.9608 | 57.6859 | 1.75013653 |
| TCGA-FS-A1YW | SKCM | Low  | 1   | 1   | 0  | 4451 | 3.3945  | 6.35198 | 1.87125644 |

|              |      |      |    |    |    |      |         |         |            |
|--------------|------|------|----|----|----|------|---------|---------|------------|
| TCGA-EQ-5647 | STAD | High | 18 | 3  | 15 | 4818 | 40.3113 | 76.053  | 1.88664221 |
| TCGA-D7-6526 | STAD | Low  | 15 | 11 | 4  | 4727 | 7.73302 | 7.37931 | 0.95425979 |
| TCGA-D7-6527 | STAD | High | 15 | 5  | 10 | 4652 | 42.9224 | 70.9997 | 1.65414096 |
| TCGA-CG-4444 | STAD | Low  | 13 | 12 | 1  | 4539 | 4.20568 | 4.18639 | 0.99541335 |
| TCGA-CG-5718 | STAD | Low  | 12 | 9  | 3  | 4815 | 5.6302  | 6.95736 | 1.23572164 |
| TCGA-D7-6518 | STAD | High | 12 | 11 | 1  | 4648 | 40.1639 | 72.3731 | 1.80194403 |
| TCGA-CD-5799 | STAD | High | 11 | 3  | 8  | 4526 | 47.1444 | 59.667  | 1.26562222 |
| TCGA-BR-4183 | STAD | Low  | 11 | 8  | 3  | 3395 | 4.47961 | 7.2083  | 1.60913562 |
| TCGA-BR-6458 | STAD | Low  | 10 | 7  | 3  | 5040 | 6.31346 | 5.33432 | 0.8449123  |
| TCGA-BR-4366 | STAD | Low  | 9  | 7  | 2  | 3594 | 3.75935 | 4.97397 | 1.32309309 |
| TCGA-BR-4357 | STAD | Low  | 9  | 1  | 8  | 2552 | 6.33047 | 9.01868 | 1.4246462  |
| TCGA-CD-5800 | STAD | Low  | 8  | 7  | 1  | 4314 | 6.56712 | 4.34897 | 0.66223398 |
| TCGA-CG-5730 | STAD | High | 7  | 4  | 3  | 4966 | 35.9953 | 31.0026 | 0.86129578 |
| TCGA-BR-4369 | STAD | Low  | 7  | 5  | 2  | 3832 | 4.21111 | 4.02661 | 0.95618732 |
| TCGA-CG-4301 | STAD | Low  | 7  | 5  | 2  | 4241 | 4.68035 | 4.84208 | 1.03455511 |
| TCGA-CG-5724 | STAD | High | 7  | 4  | 3  | 5048 | 45.328  | 57.7889 | 1.27490514 |
| TCGA-D7-6528 | STAD | High | 7  | 3  | 4  | 4616 | 31.1382 | 43.0392 | 1.38219936 |
| TCGA-D7-6820 | STAD | Low  | 7  | 5  | 2  | 4624 | 3.31089 | 6.70538 | 2.02525001 |
| TCGA-B7-5818 | STAD | Low  | 6  | 5  | 1  | 4213 | 7.82081 | 6.84598 | 0.87535434 |
| TCGA-CG-4443 | STAD | High | 6  | 2  | 4  | 4414 | 36.8864 | 33.9749 | 0.92106847 |
| TCGA-CG-4475 | STAD | Low  | 6  | 3  | 3  | 4828 | 7.21778 | 7.12748 | 0.98748923 |
| TCGA-CD-5802 | STAD | High | 6  | 3  | 3  | 4263 | 45.6634 | 63.0741 | 1.38128348 |
| TCGA-CG-4472 | STAD | Low  | 5  | 2  | 3  | 4618 | 8.68424 | 7.15156 | 0.82351018 |
| TCGA-CG-4469 | STAD | Low  | 5  | 4  | 1  | 4581 | 6.89036 | 6.51178 | 0.94505657 |
| TCGA-BR-6705 | STAD | Low  | 5  | 4  | 1  | 4966 | 8.01221 | 8.20689 | 1.02429792 |
| TCGA-D7-6815 | STAD | High | 5  | 4  | 1  | 4570 | 44.0494 | 45.2213 | 1.02660422 |
| TCGA-D7-6817 | STAD | Low  | 5  | 4  | 1  | 4681 | 7.30643 | 7.6042  | 1.04075451 |
| TCGA-D7-5579 | STAD | High | 5  | 1  | 4  | 4890 | 38.5804 | 67.4634 | 1.74864439 |
| TCGA-CG-5734 | STAD | Low  | 4  | 3  | 1  | 4883 | 6.02064 | 6.85481 | 1.13855172 |
| TCGA-D7-6519 | STAD | High | 4  | 1  | 3  | 4654 | 33.0852 | 38.1927 | 1.15437416 |
| TCGA-BR-4255 | STAD | High | 4  | 4  | 0  | 3315 | 43.0368 | 58.8686 | 1.36786657 |
| TCGA-CG-4466 | STAD | Low  | 4  | 0  | 4  | 4464 | 2.9547  | 5.08076 | 1.7195519  |
| TCGA-D7-6521 | STAD | Low  | 3  | 3  | 0  | 4621 | 6.95541 | 6.88429 | 0.98977487 |
| TCGA-BR-6454 | STAD | Low  | 3  | 3  | 0  | 4313 | 3.6963  | 3.85189 | 1.04209345 |
| TCGA-CG-5727 | STAD | Low  | 3  | 1  | 2  | 4927 | 6.07106 | 7.14869 | 1.17750278 |
| TCGA-CG-4455 | STAD | Low  | 2  | 2  | 0  | 4582 | 7.05026 | 2.94519 | 0.41774204 |
| TCGA-D7-5578 | STAD | Low  | 2  | 1  | 1  | 4944 | 7.77423 | 5.98286 | 0.76957589 |
| TCGA-CG-4440 | STAD | Low  | 2  | 0  | 2  | 4183 | 4.18989 | 3.93687 | 0.93961178 |
| TCGA-CG-5725 | STAD | Low  | 2  | 0  | 2  | 4990 | 6.72302 | 7.32308 | 1.08925453 |
| TCGA-BR-6706 | STAD | Low  | 2  | 1  | 1  | 4856 | 7.38193 | 8.2815  | 1.12186109 |
| TCGA-CG-4436 | STAD | Low  | 1  | 1  | 0  | 4204 | 6.34957 | 4.27813 | 0.67376689 |
| TCGA-D7-6818 | STAD | Low  | 1  | 1  | 0  | 4668 | 6.39357 | 6.45032 | 1.00887611 |
| TCGA-D7-6520 | STAD | Low  | 1  | 1  | 0  | 4648 | 4.82968 | 8.10393 | 1.67794347 |
| TCGA-B7-5816 | STAD | Low  | 0  | 0  | 0  | 0    | 7.60547 | 2.21774 | 0.29159802 |
| TCGA-CD-5798 | STAD | Low  | 0  | 0  | 0  | 4856 | 7.04139 | 4.25789 | 0.60469453 |
| TCGA-CD-5803 | STAD | Low  | 0  | 0  | 0  | 4263 | 6.74506 | 4.61535 | 0.68425633 |
| TCGA-CD-5801 | STAD | Low  | 0  | 0  | 0  | 4314 | 6.32653 | 5.16101 | 0.81577263 |
| TCGA-BR-6801 | STAD | Low  | 0  | 0  | 0  | 4856 | 7.65175 | 8.17552 | 1.06845101 |
| TCGA-CG-4442 | STAD | High | 0  | 0  | 0  | 4183 | 30.0708 | 35.6345 | 1.18502002 |
| TCGA-BJ-A0ZA | THCA | Low  | 1  | 1  | 0  | 16   | 5.57024 | 5.3591  | 0.96209499 |
| TCGA-BJ-A0Z9 | THCA | Low  | 0  | 0  | 0  | 0    | 5.79987 | 4.19016 | 0.72245757 |
| TCGA-DJ-A13M | THCA | Low  | 0  | 0  | 0  | 16   | 4.98553 | 4.82207 | 0.96721312 |
| TCGA-AP-A0LH | UCEC | Low  | 15 | 13 | 2  | 2480 | 7.87613 | 6.49039 | 0.82405826 |
| TCGA-AX-A0IU | UCEC | Low  | 13 | 9  | 4  | 2046 | 4.43107 | 4.46383 | 1.00739325 |
| TCGA-AP-A0L8 | UCEC | Low  | 9  | 9  | 0  | 2675 | 8.6817  | 5.87263 | 0.67643779 |
| TCGA-A5-A0G5 | UCEC | Low  | 8  | 6  | 2  | 875  | 6.27737 | 7.1433  | 1.13794471 |
| TCGA-B5-A0JN | UCEC | Low  | 8  | 6  | 2  | 2827 | 4.29916 | 5.2931  | 1.231194   |



|              |      |     |   |   |   |      |         |         |            |
|--------------|------|-----|---|---|---|------|---------|---------|------------|
| TCGA-EY-A1GC | UCEC | Low | 6 | 2 | 4 | 3796 | 6.29551 | 6.32203 | 1.00421253 |
| TCGA-D1-A100 | UCEC | Low | 6 | 5 | 1 | 3698 | 6.58878 | 7.77431 | 1.17993164 |
| TCGA-BG-A0M6 | UCEC | Low | 4 | 3 | 1 | 3744 | 5.59288 | 5.87314 | 1.05011014 |
| TCGA-D1-A17K | UCEC | Low | 4 | 0 | 4 | 3942 | 5.98067 | 6.94578 | 1.16137155 |
| TCGA-AX-A0IW | UCEC | Low | 3 | 3 | 0 | 2411 | 6.51832 | 4.0541  | 0.62195474 |
| TCGA-FI-A2CY | UCEC | Low | 3 | 2 | 1 | 3821 | 5.6333  | 5.42276 | 0.96262581 |
| TCGA-AP-A0LI | UCEC | Low | 2 | 1 | 1 | 2496 | 4.88954 | 4.83645 | 0.98914213 |
| TCGA-D1-A169 | UCEC | Low | 1 | 0 | 1 | 3829 | 7.34416 | 5.91064 | 0.80480817 |
| TCGA-AP-A0L9 | UCEC | Low | 1 | 1 | 0 | 2770 | 4.65445 | 4.19831 | 0.90199916 |
| TCGA-D1-A16I | UCEC | Low | 1 | 1 | 0 | 3875 | 3.99874 | 3.7972  | 0.94959912 |
| TCGA-BS-A0UM | UCEC | Low | 0 | 0 | 0 | 3744 | 7.58521 | 2.88486 | 0.38032698 |
| TCGA-D1-A16B | UCEC | Low | 0 | 0 | 0 | 3829 | 6.06882 | 4.96496 | 0.81810962 |
