# Supplementary material for: Identification of complex genomic rearrangements in cancers using CouGaR
Source: PubMed Central journal article supplement — Genome Res. 2017 Jan;27(1):107–17. doi: 10.1101/gr.211201.116 (PMC5204335; doi:10.1101/gr.211201.116), 2017-01
Supplement: supp_gr.211201.116_Supplemental_Table_S6.pdf [file supp_gr.211201.116_Supplemental_Table_S6.pdf]

| GeneID | Symbol  | Source(s) |  |  |  |  |  |  |
|--------|---------|-----------|--|--|--|--|--|--|
| 3725   | JUN     | COSMIC    |  |  |  |  |  |  |
| 4610   | MYCL1   | COSMIC    |  |  |  |  |  |  |
| 4194   | MDM4    | COSMIC    |  |  |  |  |  |  |
| 5966   | REL     | COSMIC    |  |  |  |  |  |  |
| 4613   | MYCN    | COSMIC    |  |  |  |  |  |  |
| 4286   | MITF    | COSMIC    |  |  |  |  |  |  |
| 6657   | SOX2    | COSMIC    |  |  |  |  |  |  |
| 4193   | MDM2    | COSMIC    |  |  |  |  |  |  |
| 7080   | NKX2-1  | COSMIC    |  |  |  |  |  |  |
| 898    | CCNE1   | COSMIC    |  |  |  |  |  |  |
| 208    | AKT2    | COSMIC    |  |  |  |  |  |  |
| 2064   | ERBB2   | COSMIC    |  |  |  |  |  |  |
| 1956   | EGFR    | COSMIC    |  |  |  |  |  |  |
| 4609   | MYC     | COSMIC    |  |  |  |  |  |  |
| 1031   | CDKN2C  | COSMIC    |  |  |  |  |  |  |
| 330    | BIRC3   | COSMIC    |  |  |  |  |  |  |
| 51684  | SUFU    | COSMIC    |  |  |  |  |  |  |
| 6416   | MAP2K4  | COSMIC    |  |  |  |  |  |  |
| 2177   | FANCD2  | COSMIC    |  |  |  |  |  |  |
| 4089   | MADH4   | COSMIC    |  |  |  |  |  |  |
| 4436   | MSH2    | COSMIC    |  |  |  |  |  |  |
| 4292   | MLH1    | COSMIC    |  |  |  |  |  |  |
| 7428   | VHL     | COSMIC    |  |  |  |  |  |  |
| 324    | APC     | COSMIC    |  |  |  |  |  |  |
| 1029   | CDKN2A  | COSMIC    |  |  |  |  |  |  |
| 2176   | FANCC   | COSMIC    |  |  |  |  |  |  |
| 7248   | TSC1    | COSMIC    |  |  |  |  |  |  |
| 5728   | PTEN    | COSMIC    |  |  |  |  |  |  |
| 7490   | WT1     | COSMIC    |  |  |  |  |  |  |
| 4221   | MEN1    | COSMIC    |  |  |  |  |  |  |
| 472    | ATM     | COSMIC    |  |  |  |  |  |  |
| 675    | BRCA2   | COSMIC    |  |  |  |  |  |  |
| 5925   | RB1     | COSMIC    |  |  |  |  |  |  |
| 8312   | AXIN1   | COSMIC    |  |  |  |  |  |  |
| 7249   | TSC2    | COSMIC    |  |  |  |  |  |  |
| 2175   | FANCA   | COSMIC    |  |  |  |  |  |  |
| 672    | BRCA1   | COSMIC    |  |  |  |  |  |  |
| 6794   | STK11   | COSMIC    |  |  |  |  |  |  |
| 4763   | NF1     | COSMIC    |  |  |  |  |  |  |
| 4771   | NF2     | COSMIC    |  |  |  |  |  |  |
| 7128   | TNFAIP3 | COSMIC    |  |  |  |  |  |  |
| 6598   | SMARCB1 | COSMIC    |  |  |  |  |  |  |
| 7403   | KDM6A   | COSMIC    |  |  |  |  |  |  |
| 639    | PRDM1   | COSMIC    |  |  |  |  |  |  |
| 1029   | CDKN2a  | COSMIC    |  |  |  |  |  |  |
| 10320  | IKZF1   | COSMIC    |  |  |  |  |  |  |
| 811    | CALR    | COSMIC    |  |  |  |  |  |  |
| 11200  | CHEK2   | COSMIC    |  |  |  |  |  |  |
| 139285 | WTX     | COSMIC    |  |  |  |  |  |  |
| 79718  | TBL1XR1 | COSMIC    |  |  |  |  |  |  |
| 8880   | FUBP1   | COSMIC    |  |  |  |  |  |  |
| 79728  | PALB2   | COSMIC    |  |  |  |  |  |  |
| 83990  | BRIP1   | COSMIC    |  |  |  |  |  |  |
| 6597   | SMARCA4 | COSMIC    |  |  |  |  |  |  |
| 171023 | ASXL1   | COSMIC    |  |  |  |  |  |  |
| 51366  | UBR5    | COSMIC    |  |  |  |  |  |  |
| 2625   | GATA3   | COSMIC    |  |  |  |  |  |  |
| 54880  | BCOR    | COSMIC    |  |  |  |  |  |  |
| 84295  | PHF6    | COSMIC    |  |  |  |  |  |  |
| 1785   | DNM2    | COSMIC    |  |  |  |  |  |  |
| 8651   | SOCS1   | COSMIC    |  |  |  |  |  |  |
| 8233   | ZRSR2   | COSMIC    |  |  |  |  |  |  |
| 51119  | SBDS    | COSMIC    |  |  |  |  |  |  |
| 1499   | CTNNB1  | COSMIC    |  |  |  |  |  |  |
| 5551   | PRF1    | COSMIC    |  |  |  |  |  |  |
| 54949  | SDH5    | COSMIC    |  |  |  |  |  |  |
| 3418   | IDH2    | COSMIC    |  |  |  |  |  |  |
| 23624  | CBLC    | COSMIC    |  |  |  |  |  |  |
| 9968   | MED12   | COSMIC    |  |  |  |  |  |  |
| 4893   | NRAS    | COSMIC    |  |  |  |  |  |  |
| 3716   | JAK1    | COSMIC    |  |  |  |  |  |  |
| 4595   | MUTYH   | COSMIC    |  |  |  |  |  |  |
| 3020   | H3F3A   | COSMIC    |  |  |  |  |  |  |
| 4352   | MPL     | COSMIC    |  |  |  |  |  |  |
| 7514   | XPO1    | COSMIC    |  |  |  |  |  |  |
| 4780   | NFE2L2  | COSMIC    |  |  |  |  |  |  |

|       |          |        |  |  |  |  |  |  |
|-------|----------|--------|--|--|--|--|--|--|
| 23451 | SF3B1    | COSMIC |  |  |  |  |  |  |
| 3417  | IDH1     | COSMIC |  |  |  |  |  |  |
| 2624  | GATA2    | COSMIC |  |  |  |  |  |  |
| 668   | FOXL2    | COSMIC |  |  |  |  |  |  |
| 5290  | PIK3CA   | COSMIC |  |  |  |  |  |  |
| 776   | CACNA1D  | COSMIC |  |  |  |  |  |  |
| 3791  | KDR      | COSMIC |  |  |  |  |  |  |
| 3020  | HIST1H3B | COSMIC |  |  |  |  |  |  |
| 84433 | CARD11   | COSMIC |  |  |  |  |  |  |
| 4233  | MET      | COSMIC |  |  |  |  |  |  |
| 6608  | SMO      | COSMIC |  |  |  |  |  |  |
| 2146  | EZH2     | COSMIC |  |  |  |  |  |  |
| 8295  | TRRAP    | COSMIC |  |  |  |  |  |  |
| 5885  | RAD21    | COSMIC |  |  |  |  |  |  |
| 2776  | GNAQ     | COSMIC |  |  |  |  |  |  |
| 9314  | KLF4     | COSMIC |  |  |  |  |  |  |
| 22978 | NT5C2    | COSMIC |  |  |  |  |  |  |
| 2263  | FGFR2    | COSMIC |  |  |  |  |  |  |
| 3265  | HRAS     | COSMIC |  |  |  |  |  |  |
| 3762  | KCNJ5    | COSMIC |  |  |  |  |  |  |
| 3845  | KRAS     | COSMIC |  |  |  |  |  |  |
| 1019  | CDK4     | COSMIC |  |  |  |  |  |  |
| 5781  | PTPN11   | COSMIC |  |  |  |  |  |  |
| 7253  | TSHR     | COSMIC |  |  |  |  |  |  |
| 207   | AKT1     | COSMIC |  |  |  |  |  |  |
| 5604  | MAP2K1   | COSMIC |  |  |  |  |  |  |
| 84231 | TRAF7    | COSMIC |  |  |  |  |  |  |
| 6427  | SRSF2    | COSMIC |  |  |  |  |  |  |
| 3021  | H3F3B    | COSMIC |  |  |  |  |  |  |
| 26040 | SETBP1   | COSMIC |  |  |  |  |  |  |
| 3718  | JAK3     | COSMIC |  |  |  |  |  |  |
| 2767  | GNA11    | COSMIC |  |  |  |  |  |  |
| 5605  | MAP2K2   | COSMIC |  |  |  |  |  |  |
| 5518  | PPP2R1A  | COSMIC |  |  |  |  |  |  |
| 2778  | GNAS     | COSMIC |  |  |  |  |  |  |
| 7307  | U2AF1    | COSMIC |  |  |  |  |  |  |
| 6134  | RPL10    | COSMIC |  |  |  |  |  |  |
| 4615  | MYD88    | COSMIC |  |  |  |  |  |  |
| 355   | TNFRSF6  | COSMIC |  |  |  |  |  |  |
| 23405 | DICER1   | COSMIC |  |  |  |  |  |  |
| 54790 | TET2     | COSMIC |  |  |  |  |  |  |
| 868   | CBLB     | COSMIC |  |  |  |  |  |  |
| 8929  | PHOX2B   | COSMIC |  |  |  |  |  |  |
| 5879  | RAC1     | COSMIC |  |  |  |  |  |  |
| 6927  | TCF1     | COSMIC |  |  |  |  |  |  |
| 3169  | FOXA1    | COSMIC |  |  |  |  |  |  |
| 2623  | GATA1    | COSMIC |  |  |  |  |  |  |
| 80204 | FBXO11   | COSMIC |  |  |  |  |  |  |
| 1616  | DAXX     | COSMIC |  |  |  |  |  |  |
| 546   | ATRX     | COSMIC |  |  |  |  |  |  |
| 1788  | DNMT3A   | COSMIC |  |  |  |  |  |  |
| 54855 | FAM46C   | COSMIC |  |  |  |  |  |  |
| 5295  | PIK3R1   | COSMIC |  |  |  |  |  |  |
| 23152 | CIC      | COSMIC |  |  |  |  |  |  |
| 10019 | SH2B3    | COSMIC |  |  |  |  |  |  |
| 5378  | PMS1     | COSMIC |  |  |  |  |  |  |
| 25913 | POT1     | COSMIC |  |  |  |  |  |  |
| 1643  | DDB2     | COSMIC |  |  |  |  |  |  |
| 4849  | CNOT3    | COSMIC |  |  |  |  |  |  |
| 1316  | COPEB    | COSMIC |  |  |  |  |  |  |
| 55294 | FBXW7    | COSMIC |  |  |  |  |  |  |
| 6125  | RPL5     | COSMIC |  |  |  |  |  |  |
| 6390  | SDHB     | COSMIC |  |  |  |  |  |  |
| 8764  | TNFRSF14 | COSMIC |  |  |  |  |  |  |
| 6391  | SDHC     | COSMIC |  |  |  |  |  |  |
| 79577 | CDC73    | COSMIC |  |  |  |  |  |  |
| 2271  | FH       | COSMIC |  |  |  |  |  |  |
| 5395  | PMS2     | COSMIC |  |  |  |  |  |  |
| 4683  | NBS1     | COSMIC |  |  |  |  |  |  |
| 657   | BMPR1A   | COSMIC |  |  |  |  |  |  |
| 2073  | ERCC5    | COSMIC |  |  |  |  |  |  |
| 641   | BLM      | COSMIC |  |  |  |  |  |  |
| 2072  | ERCC4    | COSMIC |  |  |  |  |  |  |
| 7157  | TP53     | COSMIC |  |  |  |  |  |  |
| 51755 | CDK12    | COSMIC |  |  |  |  |  |  |
| 1050  | CEBPA    | COSMIC |  |  |  |  |  |  |
| 2956  | MSH6     | COSMIC |  |  |  |  |  |  |

|        |          |        |  |  |  |  |  |  |
|--------|----------|--------|--|--|--|--|--|--|
| 7508   | XPC      | COSMIC |  |  |  |  |  |  |
| 7486   | WRN      | COSMIC |  |  |  |  |  |  |
| 2131   | EXT1     | COSMIC |  |  |  |  |  |  |
| 2189   | FANCG    | COSMIC |  |  |  |  |  |  |
| 5727   | PTCH     | COSMIC |  |  |  |  |  |  |
| 7507   | XPA      | COSMIC |  |  |  |  |  |  |
| 2132   | EXT2     | COSMIC |  |  |  |  |  |  |
| 6392   | SDHD     | COSMIC |  |  |  |  |  |  |
| 701    | BUB1B    | COSMIC |  |  |  |  |  |  |
| 1540   | CYLD     | COSMIC |  |  |  |  |  |  |
| 999    | CDH1     | COSMIC |  |  |  |  |  |  |
| 54894  | RNF43    | COSMIC |  |  |  |  |  |  |
| 2068   | ERCC2    | COSMIC |  |  |  |  |  |  |
| 10735  | STAG2    | COSMIC |  |  |  |  |  |  |
| 7454   | WAS      | COSMIC |  |  |  |  |  |  |
| 8289   | ARID1A   | COSMIC |  |  |  |  |  |  |
| 55193  | PBRM1    | COSMIC |  |  |  |  |  |  |
| 476    | ATP1A1   | COSMIC |  |  |  |  |  |  |
| 3815   | KIT      | COSMIC |  |  |  |  |  |  |
| 3575   | IL7R     | COSMIC |  |  |  |  |  |  |
| 2322   | FLT3     | COSMIC |  |  |  |  |  |  |
| 6777   | STAT5B   | COSMIC |  |  |  |  |  |  |
| 974    | CD79B    | COSMIC |  |  |  |  |  |  |
| 5156   | PDGFRA   | COSMIC |  |  |  |  |  |  |
| 2071   | ERCC3    | COSMIC |  |  |  |  |  |  |
| 2261   | FGFR3    | COSMIC |  |  |  |  |  |  |
| 64109  | CRLF2    | COSMIC |  |  |  |  |  |  |
| 673    | BRAF     | COSMIC |  |  |  |  |  |  |
| 6774   | STAT3    | COSMIC |  |  |  |  |  |  |
| 201163 | BHD      | COSMIC |  |  |  |  |  |  |
| 58508  | MLL3     | COSMIC |  |  |  |  |  |  |
| 2188   | FANCF    | COSMIC |  |  |  |  |  |  |
| 4853   | NOTCH2   | COSMIC |  |  |  |  |  |  |
| 8085   | MLL2     | COSMIC |  |  |  |  |  |  |
| 2178   | FANCE    | COSMIC |  |  |  |  |  |  |
| 9401   | RECQL4   | COSMIC |  |  |  |  |  |  |
| 8242   | KDM5C    | COSMIC |  |  |  |  |  |  |
| 29072  | SETD2    | COSMIC |  |  |  |  |  |  |
| 8314   | BAP1     | COSMIC |  |  |  |  |  |  |
| 841    | CASP8    | COSMIC |  |  |  |  |  |  |
| 196528 | ARID2    | COSMIC |  |  |  |  |  |  |
| 345930 | ECT2L    | COSMIC |  |  |  |  |  |  |
| 3572   | IL6ST    | COSMIC |  |  |  |  |  |  |
| 57120  | GOPC     | COSMIC |  |  |  |  |  |  |
| 57670  | KIAA1549 | COSMIC |  |  |  |  |  |  |
| 492    | ATP2B3   | COSMIC |  |  |  |  |  |  |
| 973    | CD79A    | COSMIC |  |  |  |  |  |  |
| 7015   | TERT     | COSMIC |  |  |  |  |  |  |
| 64783  | RBM15    | COSMIC |  |  |  |  |  |  |
| 51592  | TRIM33   | COSMIC |  |  |  |  |  |  |
| 8915   | BCL10    | COSMIC |  |  |  |  |  |  |
| 6491   | SIL      | COSMIC |  |  |  |  |  |  |
| 2060   | EPS15    | COSMIC |  |  |  |  |  |  |
| 6886   | TAL1     | COSMIC |  |  |  |  |  |  |
| 6421   | SFPQ     | COSMIC |  |  |  |  |  |  |
| 9967   | THRAP3   | COSMIC |  |  |  |  |  |  |
| 3932   | LCK      | COSMIC |  |  |  |  |  |  |
| 259283 | MDS2     | COSMIC |  |  |  |  |  |  |
| 5081   | PAX7     | COSMIC |  |  |  |  |  |  |
| 63976  | PRDM16   | COSMIC |  |  |  |  |  |  |
| 6146   | RPL22    | COSMIC |  |  |  |  |  |  |
| 23261  | CAMTA1   | COSMIC |  |  |  |  |  |  |
| 9659   | PDE4DIP  | COSMIC |  |  |  |  |  |  |
| 607    | BCL9     | COSMIC |  |  |  |  |  |  |
| 83417  | IRTA1    | COSMIC |  |  |  |  |  |  |
| 4582   | MUC1     | COSMIC |  |  |  |  |  |  |
| 10962  | AF1Q     | COSMIC |  |  |  |  |  |  |
| 405    | ARNT     | COSMIC |  |  |  |  |  |  |
| 4914   | NTRK1    | COSMIC |  |  |  |  |  |  |
| 5546   | PRCC     | COSMIC |  |  |  |  |  |  |
| 7170   | TPM3     | COSMIC |  |  |  |  |  |  |
| 2213   | FCGR2B   | COSMIC |  |  |  |  |  |  |
| 5087   | PBX1     | COSMIC |  |  |  |  |  |  |
| 5396   | PMX1     | COSMIC |  |  |  |  |  |  |
| 27     | ABL2     | COSMIC |  |  |  |  |  |  |
| 7175   | TPR      | COSMIC |  |  |  |  |  |  |
| 2005   | ELK4     | COSMIC |  |  |  |  |  |  |

|        |           |        |  |  |  |  |  |  |  |
|--------|-----------|--------|--|--|--|--|--|--|--|
| 85414  | SLC45A3   | COSMIC |  |  |  |  |  |  |  |
| 50802  | IGK       | COSMIC |  |  |  |  |  |  |  |
| 53335  | BCL11A    | COSMIC |  |  |  |  |  |  |  |
| 27436  | EML4      | COSMIC |  |  |  |  |  |  |  |
| 8648   | NCOA1     | COSMIC |  |  |  |  |  |  |  |
| 80304  | C2orf44   | COSMIC |  |  |  |  |  |  |  |
| 3899   | LAF4      | COSMIC |  |  |  |  |  |  |  |
| 7849   | PAX8      | COSMIC |  |  |  |  |  |  |  |
| 150465 | TTL       | COSMIC |  |  |  |  |  |  |  |
| 3237   | HOXD11    | COSMIC |  |  |  |  |  |  |  |
| 3239   | HOXD13    | COSMIC |  |  |  |  |  |  |  |
| 1123   | CHN1      | COSMIC |  |  |  |  |  |  |  |
| 1385   | CREB1     | COSMIC |  |  |  |  |  |  |  |
| 471    | ATIC      | COSMIC |  |  |  |  |  |  |  |
| 5077   | PAX3      | COSMIC |  |  |  |  |  |  |  |
| 2181   | ACSL3     | COSMIC |  |  |  |  |  |  |  |
| 54738  | FEV       | COSMIC |  |  |  |  |  |  |  |
| 57007  | CMKOR1    | COSMIC |  |  |  |  |  |  |  |
| 5468   | PPARG     | COSMIC |  |  |  |  |  |  |  |
| 2122   | MDS1      | COSMIC |  |  |  |  |  |  |  |
| 27086  | FOXP1     | COSMIC |  |  |  |  |  |  |  |
| 2272   | FHIT      | COSMIC |  |  |  |  |  |  |  |
| 51517  | AF3p21    | COSMIC |  |  |  |  |  |  |  |
| 5894   | RAF1      | COSMIC |  |  |  |  |  |  |  |
| 9901   | SRGAP3    | COSMIC |  |  |  |  |  |  |  |
| 10342  | TFG       | COSMIC |  |  |  |  |  |  |  |
| 7555   | ZNF9      | COSMIC |  |  |  |  |  |  |  |
| 6184   | RPN1      | COSMIC |  |  |  |  |  |  |  |
| 25937  | WWTR1     | COSMIC |  |  |  |  |  |  |  |
| 8833   | GMPS      | COSMIC |  |  |  |  |  |  |  |
| 4291   | MLF1      | COSMIC |  |  |  |  |  |  |  |
| 2122   | EVI1      | COSMIC |  |  |  |  |  |  |  |
| 1974   | EIF4A2    | COSMIC |  |  |  |  |  |  |  |
| 2119   | ETV5      | COSMIC |  |  |  |  |  |  |  |
| 4026   | LPP       | COSMIC |  |  |  |  |  |  |  |
| 7037   | TFRC      | COSMIC |  |  |  |  |  |  |  |
| 399    | ARHH      | COSMIC |  |  |  |  |  |  |  |
| 10568  | SLC34A2   | COSMIC |  |  |  |  |  |  |  |
| 7468   | WHSC1     | COSMIC |  |  |  |  |  |  |  |
| 26511  | CHIC2     | COSMIC |  |  |  |  |  |  |  |
| 81608  | FIP1L1    | COSMIC |  |  |  |  |  |  |  |
| 4299   | MLLT2     | COSMIC |  |  |  |  |  |  |  |
| 5910   | RAP1GDS1  | COSMIC |  |  |  |  |  |  |  |
| 3558   | IL2       | COSMIC |  |  |  |  |  |  |  |
| 22947  | DUX4      | COSMIC |  |  |  |  |  |  |  |
| 3977   | LIFR      | COSMIC |  |  |  |  |  |  |  |
| 27125  | AF5q31    | COSMIC |  |  |  |  |  |  |  |
| 23305  | FACL6     | COSMIC |  |  |  |  |  |  |  |
| 3702   | ITK       | COSMIC |  |  |  |  |  |  |  |
| 5159   | PDGFRB    | COSMIC |  |  |  |  |  |  |  |
| 972    | CD74      | COSMIC |  |  |  |  |  |  |  |
| 1879   | EBF1      | COSMIC |  |  |  |  |  |  |  |
| 64901  | RANBP17   | COSMIC |  |  |  |  |  |  |  |
| 64324  | NSD1      | COSMIC |  |  |  |  |  |  |  |
| 30012  | TLX3      | COSMIC |  |  |  |  |  |  |  |
| 3326   | HSPCB     | COSMIC |  |  |  |  |  |  |  |
| 896    | CCND3     | COSMIC |  |  |  |  |  |  |  |
| 3159   | HMGA1     | COSMIC |  |  |  |  |  |  |  |
| 6428   | SFRS3     | COSMIC |  |  |  |  |  |  |  |
| 7942   | TFEB      | COSMIC |  |  |  |  |  |  |  |
| 5292   | PIMI1     | COSMIC |  |  |  |  |  |  |  |
| 8294   | HIST1H4I  | COSMIC |  |  |  |  |  |  |  |
| 5460   | POU5F1    | COSMIC |  |  |  |  |  |  |  |
| 5987   | TRIM27    | COSMIC |  |  |  |  |  |  |  |
| 7913   | DEK       | COSMIC |  |  |  |  |  |  |  |
| 3662   | IRF4      | COSMIC |  |  |  |  |  |  |  |
| 2309   | FOXO3A    | COSMIC |  |  |  |  |  |  |  |
| 6098   | ROS1      | COSMIC |  |  |  |  |  |  |  |
| 4602   | MYB       | COSMIC |  |  |  |  |  |  |  |
| 7955   | STL       | COSMIC |  |  |  |  |  |  |  |
| 7430   | EZR       | COSMIC |  |  |  |  |  |  |  |
| 11116  | FGFR1OP   | COSMIC |  |  |  |  |  |  |  |
| 4301   | MLLT4     | COSMIC |  |  |  |  |  |  |  |
| 2115   | ETV1      | COSMIC |  |  |  |  |  |  |  |
| 3181   | HNRNPA2B1 | COSMIC |  |  |  |  |  |  |  |
| 3207   | HOXA11    | COSMIC |  |  |  |  |  |  |  |
| 3209   | HOXA13    | COSMIC |  |  |  |  |  |  |  |

|        |          |        |  |  |  |  |  |  |
|--------|----------|--------|--|--|--|--|--|--|
| 3205   | HOXA9    | COSMIC |  |  |  |  |  |  |
| 221895 | JAZF1    | COSMIC |  |  |  |  |  |  |
| 2006   | ELN      | COSMIC |  |  |  |  |  |  |
| 3092   | HIP1     | COSMIC |  |  |  |  |  |  |
| 10142  | AKAP9    | COSMIC |  |  |  |  |  |  |
| 1021   | CDK6     | COSMIC |  |  |  |  |  |  |
| 8805   | TIF1     | COSMIC |  |  |  |  |  |  |
| 64764  | CREB3L2  | COSMIC |  |  |  |  |  |  |
| 6957   | TRB      | COSMIC |  |  |  |  |  |  |
| 3110   | HLXB9    | COSMIC |  |  |  |  |  |  |
| 7994   | RUNXBP2  | COSMIC |  |  |  |  |  |  |
| 2260   | FGFR1    | COSMIC |  |  |  |  |  |  |
| 84376  | HOOK3    | COSMIC |  |  |  |  |  |  |
| 54904  | WHSC1L1  | COSMIC |  |  |  |  |  |  |
| 5108   | PCMI     | COSMIC |  |  |  |  |  |  |
| 79145  | CHCHD7   | COSMIC |  |  |  |  |  |  |
| 6917   | TCEA1    | COSMIC |  |  |  |  |  |  |
| 5324   | PLAG1    | COSMIC |  |  |  |  |  |  |
| 10499  | NCOA2    | COSMIC |  |  |  |  |  |  |
| 862    | CBFA2T1  | COSMIC |  |  |  |  |  |  |
| 1345   | COX6C    | COSMIC |  |  |  |  |  |  |
| 10397  | NDRG1    | COSMIC |  |  |  |  |  |  |
| 4300   | MLLT3    | COSMIC |  |  |  |  |  |  |
| 11168  | PSIP2    | COSMIC |  |  |  |  |  |  |
| 29126  | CD274    | COSMIC |  |  |  |  |  |  |
| 4781   | NFIB     | COSMIC |  |  |  |  |  |  |
| 80380  | CD273    | COSMIC |  |  |  |  |  |  |
| 6850   | SYK      | COSMIC |  |  |  |  |  |  |
| 8013   | NR4A3    | COSMIC |  |  |  |  |  |  |
| 4958   | OMD      | COSMIC |  |  |  |  |  |  |
| 23048  | FNBP1    | COSMIC |  |  |  |  |  |  |
| 6887   | TAL2     | COSMIC |  |  |  |  |  |  |
| 11064  | CEP1     | COSMIC |  |  |  |  |  |  |
| 8019   | BRD3     | COSMIC |  |  |  |  |  |  |
| 6418   | SET      | COSMIC |  |  |  |  |  |  |
| 8021   | NUP214   | COSMIC |  |  |  |  |  |  |
| 5900   | RALGDS   | COSMIC |  |  |  |  |  |  |
| 10006  | ABII     | COSMIC |  |  |  |  |  |  |
| 3799   | KIF5B    | COSMIC |  |  |  |  |  |  |
| 8028   | MLLT10   | COSMIC |  |  |  |  |  |  |
| 8031   | NCOA4    | COSMIC |  |  |  |  |  |  |
| 8030   | CCDC6    | COSMIC |  |  |  |  |  |  |
| 8030   | DIOS170  | COSMIC |  |  |  |  |  |  |
| 80312  | LCX      | COSMIC |  |  |  |  |  |  |
| 23522  | MYST4    | COSMIC |  |  |  |  |  |  |
| 729262 | FAM22B   | COSMIC |  |  |  |  |  |  |
| 728118 | FAM22A   | COSMIC |  |  |  |  |  |  |
| 4791   | NFKB2    | COSMIC |  |  |  |  |  |  |
| 3195   | TLX1     | COSMIC |  |  |  |  |  |  |
| 143187 | VTI1A    | COSMIC |  |  |  |  |  |  |
| 6934   | TCF7L2   | COSMIC |  |  |  |  |  |  |
| 90993  | CREB3L1  | COSMIC |  |  |  |  |  |  |
| 4005   | LMO2     | COSMIC |  |  |  |  |  |  |
| 4928   | NUP98    | COSMIC |  |  |  |  |  |  |
| 833    | CARS     | COSMIC |  |  |  |  |  |  |
| 10978  | HEAB     | COSMIC |  |  |  |  |  |  |
| 4926   | NUMA1    | COSMIC |  |  |  |  |  |  |
| 595    | CCND1    | COSMIC |  |  |  |  |  |  |
| 8301   | PICALM   | COSMIC |  |  |  |  |  |  |
| 84441  | MAML2    | COSMIC |  |  |  |  |  |  |
| 1662   | DDX10    | COSMIC |  |  |  |  |  |  |
| 5049   | PAFAH1B2 | COSMIC |  |  |  |  |  |  |
| 5450   | POU2AF1  | COSMIC |  |  |  |  |  |  |
| 7704   | ZNF145   | COSMIC |  |  |  |  |  |  |
| 1656   | DDX6     | COSMIC |  |  |  |  |  |  |
| 9159   | PCSK7    | COSMIC |  |  |  |  |  |  |
| 23365  | ARHGEF12 | COSMIC |  |  |  |  |  |  |
| 2313   | FLI1     | COSMIC |  |  |  |  |  |  |
| 378938 | MALAT1   | COSMIC |  |  |  |  |  |  |
| 894    | CCND2    | COSMIC |  |  |  |  |  |  |
| 2120   | ETV6     | COSMIC |  |  |  |  |  |  |
| 171017 | ZNF384   | COSMIC |  |  |  |  |  |  |
| 23085  | ELKS     | COSMIC |  |  |  |  |  |  |
| 466    | ATF1     | COSMIC |  |  |  |  |  |  |
| 1649   | DDIT3    | COSMIC |  |  |  |  |  |  |
| 3227   | HOXC11   | COSMIC |  |  |  |  |  |  |
| 3229   | HOXC13   | COSMIC |  |  |  |  |  |  |

|        |          |        |  |  |  |  |  |  |
|--------|----------|--------|--|--|--|--|--|--|
| 121227 | LRIG3    | COSMIC |  |  |  |  |  |  |
| 93669  | C12orf9  | COSMIC |  |  |  |  |  |  |
| 11197  | WIF1     | COSMIC |  |  |  |  |  |  |
| 8091   | HMGA2    | COSMIC |  |  |  |  |  |  |
| 694    | BTG1     | COSMIC |  |  |  |  |  |  |
| 4666   | NACA     | COSMIC |  |  |  |  |  |  |
| 605    | BCL7A    | COSMIC |  |  |  |  |  |  |
| 217    | ALDH2    | COSMIC |  |  |  |  |  |  |
| 3936   | LCP1     | COSMIC |  |  |  |  |  |  |
| 7750   | ZNF198   | COSMIC |  |  |  |  |  |  |
| 10186  | LHFP     | COSMIC |  |  |  |  |  |  |
| 1045   | CDX2     | COSMIC |  |  |  |  |  |  |
| 2308   | FOXO1A   | COSMIC |  |  |  |  |  |  |
| 9950   | GOLGA5   | COSMIC |  |  |  |  |  |  |
| 6964   | TRD      | COSMIC |  |  |  |  |  |  |
| 57820  | CCNB1IP1 | COSMIC |  |  |  |  |  |  |
| 6955   | TRA      | COSMIC |  |  |  |  |  |  |
| 3895   | KTN1     | COSMIC |  |  |  |  |  |  |
| 5890   | RAD51L1  | COSMIC |  |  |  |  |  |  |
| 51199  | NIN      | COSMIC |  |  |  |  |  |  |
| 10243  | GPHN     | COSMIC |  |  |  |  |  |  |
| 9321   | TRIP11   | COSMIC |  |  |  |  |  |  |
| 64919  | BCL11B   | COSMIC |  |  |  |  |  |  |
| 8115   | TCL1A    | COSMIC |  |  |  |  |  |  |
| 27004  | TCL6     | COSMIC |  |  |  |  |  |  |
| 3320   | HSPCA    | COSMIC |  |  |  |  |  |  |
| 3492   | IGH      | COSMIC |  |  |  |  |  |  |
| 57082  | AF15Q14  | COSMIC |  |  |  |  |  |  |
| 256646 | C15orf55 | COSMIC |  |  |  |  |  |  |
| 6938   | TCF12    | COSMIC |  |  |  |  |  |  |
| 283651 | C15orf21 | COSMIC |  |  |  |  |  |  |
| 145788 | FLJ27352 | COSMIC |  |  |  |  |  |  |
| 5371   | PML      | COSMIC |  |  |  |  |  |  |
| 4916   | NTRK3    | COSMIC |  |  |  |  |  |  |
| 64784  | CRTC3    | COSMIC |  |  |  |  |  |  |
| 50615  | IL21R    | COSMIC |  |  |  |  |  |  |
| 2521   | FUS      | COSMIC |  |  |  |  |  |  |
| 4261   | CIITA    | COSMIC |  |  |  |  |  |  |
| 608    | TNFRSF17 | COSMIC |  |  |  |  |  |  |
| 116028 | C16orf75 | COSMIC |  |  |  |  |  |  |
| 84127  | RUNDC2A  | COSMIC |  |  |  |  |  |  |
| 4629   | MYH11    | COSMIC |  |  |  |  |  |  |
| 9709   | HERPUD1  | COSMIC |  |  |  |  |  |  |
| 865    | CBFB     | COSMIC |  |  |  |  |  |  |
| 4094   | MAF      | COSMIC |  |  |  |  |  |  |
| 1009   | CDH11    | COSMIC |  |  |  |  |  |  |
| 863    | CBFA2T3  | COSMIC |  |  |  |  |  |  |
| 5914   | RARA     | COSMIC |  |  |  |  |  |  |
| 10801  | MSF      | COSMIC |  |  |  |  |  |  |
| 8522   | GAS7     | COSMIC |  |  |  |  |  |  |
| 92521  | HCMOGT-1 | COSMIC |  |  |  |  |  |  |
| 9135   | RAB5EP   | COSMIC |  |  |  |  |  |  |
| 9098   | USP6     | COSMIC |  |  |  |  |  |  |
| 5187   | PER1     | COSMIC |  |  |  |  |  |  |
| 7531   | YWHAE    | COSMIC |  |  |  |  |  |  |
| 3927   | LASP1    | COSMIC |  |  |  |  |  |  |
| 1213   | CLTC     | COSMIC |  |  |  |  |  |  |
| 8148   | TAF15    | COSMIC |  |  |  |  |  |  |
| 23512  | SUZ12    | COSMIC |  |  |  |  |  |  |
| 1655   | DDX5     | COSMIC |  |  |  |  |  |  |
| 2118   | ETV4     | COSMIC |  |  |  |  |  |  |
| 4302   | MLLT6    | COSMIC |  |  |  |  |  |  |
| 1277   | COL1A1   | COSMIC |  |  |  |  |  |  |
| 3131   | HLF      | COSMIC |  |  |  |  |  |  |
| 603    | BCL5     | COSMIC |  |  |  |  |  |  |
| 124540 | MSI2     | COSMIC |  |  |  |  |  |  |
| 79058  | ASPSCR1  | COSMIC |  |  |  |  |  |  |
| 124583 | CANT1    | COSMIC |  |  |  |  |  |  |
| 57674  | ALO17    | COSMIC |  |  |  |  |  |  |
| 6760   | SS18     | COSMIC |  |  |  |  |  |  |
| 25925  | ZNF521   | COSMIC |  |  |  |  |  |  |
| 10892  | MALT1    | COSMIC |  |  |  |  |  |  |
| 2531   | FVT1     | COSMIC |  |  |  |  |  |  |
| 596    | BCL2     | COSMIC |  |  |  |  |  |  |
| 6455   | SH3GL1   | COSMIC |  |  |  |  |  |  |
| 10272  | FSTL3    | COSMIC |  |  |  |  |  |  |
| 23373  | MECT1    | COSMIC |  |  |  |  |  |  |

|        |          |                       |                    |                   |                   |          |  |
|--------|----------|-----------------------|--------------------|-------------------|-------------------|----------|--|
| 23476  | BRD4     | COSMIC                |                    |                   |                   |          |  |
| 8178   | ELL      | COSMIC                |                    |                   |                   |          |  |
| 7171   | TPM4     | COSMIC                |                    |                   |                   |          |  |
| 4066   | LYL1     | COSMIC                |                    |                   |                   |          |  |
| 4298   | MLL1     | COSMIC                |                    |                   |                   |          |  |
| 6929   | TCF3     | COSMIC                |                    |                   |                   |          |  |
| 29844  | TFPT     | COSMIC                |                    |                   |                   |          |  |
| 602    | BCL3     | COSMIC                |                    |                   |                   |          |  |
| 55422  | ZNF331   | COSMIC                |                    |                   |                   |          |  |
| 3817   | KLK2     | COSMIC                |                    |                   |                   |          |  |
| 9935   | MAFB     | COSMIC                |                    |                   |                   |          |  |
| 6385   | SDC4     | COSMIC                |                    |                   |                   |          |  |
| 7150   | TOP1     | COSMIC                |                    |                   |                   |          |  |
| 26039  | SS18L1   | COSMIC                |                    |                   |                   |          |  |
| 10215  | OLIG2    | COSMIC                |                    |                   |                   |          |  |
| 2078   | ERG      | COSMIC                |                    |                   |                   |          |  |
| 7113   | TMPRSS2  | COSMIC                |                    |                   |                   |          |  |
| 861    | RUNX1    | COSMIC                |                    |                   |                   |          |  |
| 3535   | IGL      | COSMIC                |                    |                   |                   |          |  |
| 5413   | PNUTL1   | COSMIC                |                    |                   |                   |          |  |
| 8218   | CLTCL1   | COSMIC                |                    |                   |                   |          |  |
| 613    | BCR      | COSMIC                |                    |                   |                   |          |  |
| 2130   | EWSR1    | COSMIC                |                    |                   |                   |          |  |
| 23598  | ZNF278   | COSMIC                |                    |                   |                   |          |  |
| 5155   | PDGFB    | COSMIC                |                    |                   |                   |          |  |
| 57591  | MKL1     | COSMIC                |                    |                   |                   |          |  |
| 4330   | MN1      | COSMIC                |                    |                   |                   |          |  |
| 4627   | MYH9     | COSMIC                |                    |                   |                   |          |  |
| 7030   | TFE3     | COSMIC                |                    |                   |                   |          |  |
| 6759   | SSX4     | COSMIC                |                    |                   |                   |          |  |
| 6756   | SSX1     | COSMIC                |                    |                   |                   |          |  |
| 6757   | SSX2     | COSMIC                |                    |                   |                   |          |  |
| 4478   | MSN      | COSMIC                |                    |                   |                   |          |  |
| 4841   | NONO     | COSMIC                |                    |                   |                   |          |  |
| 4303   | MLL17    | COSMIC                |                    |                   |                   |          |  |
| 23157  | SEPT6    | COSMIC                |                    |                   |                   |          |  |
| 2000   | ELF4     | COSMIC                |                    |                   |                   |          |  |
| 4515   | MTCP1    | COSMIC                |                    |                   |                   |          |  |
| 286530 | P2RY8    | COSMIC                |                    |                   |                   |          |  |
| 23462  | HEY1     | COSMIC                |                    |                   |                   |          |  |
| 5927   | KDM5A    | COSMIC                |                    |                   |                   |          |  |
| 2033   | EP300    | COSMIC                |                    |                   |                   |          |  |
| 4004   | LMO1     | COSMIC                |                    |                   |                   |          |  |
| 2719   | GPC3     | COSMIC                |                    |                   |                   |          |  |
| 4869   | NPM1     | COSMIC                |                    |                   |                   |          |  |
| 23092  | GRAF     | COSMIC                |                    |                   |                   |          |  |
| 604    | BCL6     | COSMIC                |                    |                   |                   |          |  |
| 25     | ABL1     | COSMIC                |                    |                   |                   |          |  |
| 867    | CBL      | COSMIC                |                    |                   |                   |          |  |
| 238    | ALK      | COSMIC                |                    |                   |                   |          |  |
| 5079   | PAX5     | COSMIC                |                    |                   |                   |          |  |
| 5979   | RET      | COSMIC                |                    |                   |                   |          |  |
| 5573   | PRKAR1A  | COSMIC                |                    |                   |                   |          |  |
| 4851   | NOTCH1   | COSMIC                |                    |                   |                   |          |  |
| 3717   | JAK2     | COSMIC                |                    |                   |                   |          |  |
| 1387   | CREBBP   | COSMIC                |                    |                   |                   |          |  |
| 4297   | MLL      | COSMIC                |                    |                   |                   |          |  |
| 1441   | CSF3R    | COSMIC                |                    |                   |                   |          |  |
| 5788   | PTPRC    | COSMIC                |                    |                   |                   |          |  |
| 4149   | MAX      | COSMIC                |                    |                   |                   |          |  |
| 6605   | SMARCE1  | COSMIC                |                    |                   |                   |          |  |
| 5243   | ABCB1    | Tamborero             | Lawrence           | F-census          |                   |          |  |
| 8647   | ABCB11   | F-census              | 114CpGs            |                   |                   |          |  |
| 91     | ACVR1B   | Getz.Signature.All    | Getz.Subset        | Tamborero         | Kandoth.PanCancer | F-census |  |
| 92     | ACVR2A   | Tamborero             | Kandoth.PanCancer  | F-census          | IonTorrent        |          |  |
| 80070  | ADAMTS20 | Lawrence              | F-census           | IonTorrent        |                   |          |  |
| 84962  | AJUBA    | Getz.Signature.All    | Getz.Subset        | Tamborero         | Kandoth.PanCancer |          |  |
| 10000  | AKT3     | F-census              | IonTorrent         |                   |                   |          |  |
| 115701 | ALPK2    | Getz.Signature.All    | Lawrence           | F-census          |                   |          |  |
| 317    | APAF1    | Tamborero             | F-census           |                   |                   |          |  |
| 374    | AREG     | Tamborero             | Kandoth.PanCancer  | F-census          | IonTorrent        |          |  |
| 2909   | ARHGAP35 | Getz.Signature.All    | Tamborero          | Kandoth.PanCancer | F-census          |          |  |
| 84159  | ARID5B   | Getz.Signature.All    | Getz.Subset        | Tamborero         | Kandoth.PanCancer |          |  |
| 9048   | ARTN     | F-census              | illumina           | 114CpGs           | IonTorrent        | BROCA    |  |
| 460    | ASTN1    | Lawrence              | F-census           |                   |                   |          |  |
| 55252  | ASXL2    | Pediatric.1000Genomes | Getz.Signature.All | Getz.Subset       |                   |          |  |
| 55729  | ATF7IP   | Pediatric.1000Genomes | Tamborero          | F-census          |                   |          |  |

|        |          |                       |                    |                   |                   |          |         |  |
|--------|----------|-----------------------|--------------------|-------------------|-------------------|----------|---------|--|
| 57194  | ATP10A   | Lawrence              | F-census           |                   |                   |          |         |  |
| 6790   | AURKA    | F-census              | IonTorrent         |                   |                   |          |         |  |
| 54998  | AURKAIP1 | F-census              | illumina           |                   |                   |          |         |  |
| 9212   | AURKB    | F-census              | IonTorrent         |                   |                   |          |         |  |
| 8313   | AXIN2    | Getz.Signature.All    | Getz.Subset        | Tamborero         | Kandoth.PanCancer | F-census | 114CpGs |  |
| 567    | B2M      | Getz.Signature.All    | Getz.Subset        | Tamborero         |                   |          |         |  |
| 577    | BAI3     | Lawrence              | F-census           | IonTorrent        |                   |          |         |  |
| 580    | BARD1    | Tamborero             | F-census           | BROCA             |                   |          |         |  |
| 11176  | BAZ2A    | Pediatric.1000Genomes | Tamborero          |                   |                   |          |         |  |
| 598    | BCL2L1   | F-census              | IonTorrent         |                   |                   |          |         |  |
| 283149 | BCL9L    | Tamborero             | F-census           |                   |                   |          |         |  |
| 9774   | BCLAF1   | Getz.Signature.All    | Tamborero          | Lawrence          |                   |          |         |  |
| 23743  | BHMT2    | Getz.Signature.All    | Getz.Subset        |                   |                   |          |         |  |
| 254065 | BRWD3    | Pediatric.1000Genomes | F-census           |                   |                   |          |         |  |
| 695    | BTK      | F-census              | IonTorrent         |                   |                   |          |         |  |
| 799    | CALCR    | Lawrence              | F-census           |                   |                   |          |         |  |
| 970    | CD70     | Getz.Signature.All    | Getz.Subset        |                   |                   |          |         |  |
| 990    | CDC6     | Pediatric.1000Genomes | F-census           |                   |                   |          |         |  |
| 1008   | CDH10    | Lawrence              | F-census           |                   |                   |          |         |  |
| 28316  | CDH20    | F-census              | IonTorrent         |                   |                   |          |         |  |
| 1024   | CDK8     | F-census              | IonTorrent         |                   |                   |          |         |  |
| 1027   | CDKN1B   | Getz.Signature.All    | Getz.Subset        | Tamborero         | Kandoth.PanCancer | F-census | 114CpGs |  |
| 1030   | CDKN2B   | F-census              | IonTorrent         |                   |                   |          |         |  |
| 1063   | CENPF    | Pediatric.1000Genomes | F-census           |                   |                   |          |         |  |
| 1105   | CHD1     | Pediatric.1000Genomes | F-census           |                   |                   |          |         |  |
| 1107   | CHD3     | Tamborero             | F-census           |                   |                   |          |         |  |
| 1108   | CHD4     | Pediatric.1000Genomes | Getz.Signature.All | Getz.Subset       | Tamborero         |          |         |  |
| 84181  | CHD6     | Pediatric.1000Genomes | F-census           |                   |                   |          |         |  |
| 55636  | CHD7     | Pediatric.1000Genomes | Tamborero          |                   |                   |          |         |  |
| 57680  | CHD8     | Getz.Signature.All    | Tamborero          |                   |                   |          |         |  |
| 1111   | CHEK1    | IonTorrent            | BROCA              |                   |                   |          |         |  |
| 22883  | CLSTN1   | F-census              | IonTorrent         |                   |                   |          |         |  |
| 64084  | CLSTN2   | Lawrence              | F-census           |                   |                   |          |         |  |
| 53942  | CNTN5    | Lawrence              | F-census           |                   |                   |          |         |  |
| 1301   | COL11A1  | Lawrence              | F-census           |                   |                   |          |         |  |
| 1310   | COL19A1  | Lawrence              | F-census           |                   |                   |          |         |  |
| 1289   | COL5A1   | Getz.Signature.All    | F-census           |                   |                   |          |         |  |
| 1294   | COL7A1   | F-census              | 114CpGs            |                   |                   |          |         |  |
| 81035  | COLEC12  | Lawrence              | F-census           |                   |                   |          |         |  |
| 1436   | CSF1R    | F-census              | IonTorrent         |                   |                   |          |         |  |
| 1438   | CSF2RA   | Lawrence              | F-census           |                   |                   |          |         |  |
| 114788 | CSMD3    | Lawrence              | F-census           | IonTorrent        |                   |          |         |  |
| 10664  | CTCF     | Getz.Signature.All    | Getz.Subset        | Tamborero         | Kandoth.PanCancer |          |         |  |
| 1495   | CTNNA1   | F-census              | IonTorrent         | BROCA             |                   |          |         |  |
| 1496   | CTNNA2   | Lawrence              | F-census           |                   |                   |          |         |  |
| 1500   | CTNND1   | Tamborero             | F-census           |                   |                   |          |         |  |
| 2017   | CTTN     | Tamborero             | F-census           |                   |                   |          |         |  |
| 8452   | CUL3     | Tamborero             | Lawrence           |                   |                   |          |         |  |
| 8450   | CUL4B    | Getz.Signature.All    | F-census           |                   |                   |          |         |  |
| 1523   | CUX1     | Getz.Signature.All    | Getz.Subset        | Tamborero         | F-census          |          |         |  |
| 1543   | CYP1A1   | Lawrence              | F-census           |                   |                   |          |         |  |
| 1589   | CYP21A2  | Lawrence              | F-census           |                   |                   |          |         |  |
| 153090 | DAB2IP   | Tamborero             | F-census           |                   |                   |          |         |  |
| 117154 | DACH2    | Lawrence              | F-census           |                   |                   |          |         |  |
| 1630   | DCC      | F-census              | IonTorrent         |                   |                   |          |         |  |
| 1654   | DDX3X    | Getz.Signature.All    | Getz.Subset        | Tamborero         | F-census          |          |         |  |
| 22894  | DIS3     | Getz.Signature.All    | Getz.Subset        |                   |                   |          |         |  |
| 129563 | DIS3L2   | Tamborero             | illumina           | 114CpGs           |                   |          |         |  |
| 1736   | DKC1     | F-census              | 114CpGs            |                   |                   |          |         |  |
| 1794   | DOCK2    | Tamborero             | F-census           |                   |                   |          |         |  |
| 57628  | DPP10    | Lawrence              | F-census           |                   |                   |          |         |  |
| 1806   | DPYD     | F-census              | IonTorrent         |                   |                   |          |         |  |
| 1826   | DSCAM    | Pediatric.1000Genomes | F-census           |                   |                   |          |         |  |
| 667    | DST      | Tamborero             | IonTorrent         |                   |                   |          |         |  |
| 1960   | EGR3     | Kandoth.PanCancer     | F-census           |                   |                   |          |         |  |
| 1999   | ELF3     | Getz.Signature.All    | Tamborero          | Kandoth.PanCancer |                   |          |         |  |
| 57634  | EP400    | Pediatric.1000Genomes | F-census           | IonTorrent        |                   |          |         |  |
| 23136  | EPB41L3  | Tamborero             | Lawrence           | F-census          |                   |          |         |  |
| 4072   | EPCAM    | F-census              | illumina           | ColoSeq           |                   |          |         |  |
| 1969   | EPHA2    | Getz.Signature.All    | Getz.Subset        | F-census          |                   |          |         |  |
| 2042   | EPHA3    | Tamborero             | Kandoth.PanCancer  | F-census          | IonTorrent        |          |         |  |
| 285220 | EPHA6    | Lawrence              | F-census           |                   |                   |          |         |  |
| 2045   | EPHA7    | F-census              | IonTorrent         |                   |                   |          |         |  |
| 2047   | EPHB1    | Lawrence              | F-census           | IonTorrent        |                   |          |         |  |
| 2050   | EPHB4    | F-census              | IonTorrent         |                   |                   |          |         |  |
| 2051   | EPHB6    | Tamborero             | Kandoth.PanCancer  | F-census          | IonTorrent        |          |         |  |
| 83481  | EPPK1    | Tamborero             | Kandoth.PanCancer  |                   |                   |          |         |  |



|        |           |                       |                   |                   |                   |          |          |            |
|--------|-----------|-----------------------|-------------------|-------------------|-------------------|----------|----------|------------|
| 2065   | ERBB3     | Getz.Signature.All    | Getz.Subset       | F-census          | IonTorrent        |          |          |            |
| 2066   | ERBB4     | Tamborero             | Kandoth.PanCancer | F-census          | IonTorrent        |          |          |            |
| 26059  | ERC2      | Tamborero             |                   | F-census          |                   |          |          |            |
| 2067   | ERCC1     | F-census              | IonTorrent        |                   |                   |          |          |            |
| 2074   | ERCC6     | Pediatric.1000Genomes | F-census          |                   |                   |          |          |            |
| 2099   | ESR1      | Tamborero             |                   | F-census          | IonTorrent        |          |          |            |
| 2113   | ETS1      | F-census              | IonTorrent        |                   |                   |          |          |            |
| 2194   | FASN      | F-census              | IonTorrent        |                   |                   |          |          |            |
| 2195   | FAT1      | Getz.Signature.All    | Getz.Subset       | Lawrence          | F-census          |          |          |            |
| 2201   | FBN2      | Tamborero             |                   | F-census          |                   |          |          |            |
| 2242   | FES       | Tamborero             |                   | F-census          |                   |          |          |            |
| 2264   | FGFR4     | F-census              | IonTorrent        |                   |                   |          |          |            |
| 2312   | FLG       | Getz.Signature.All    |                   | Lawrence          |                   |          |          |            |
| 2316   | FLNA      | Tamborero             |                   | F-census          |                   |          |          |            |
| 2321   | FLT1      | F-census              | IonTorrent        |                   |                   |          |          |            |
| 2324   | FLT4      | F-census              | IonTorrent        |                   |                   |          |          |            |
| 56776  | FMN2      | Lawrence              |                   | F-census          |                   |          |          |            |
| 2335   | FN1       | Tamborero             |                   | F-census          | IonTorrent        |          |          |            |
| 2355   | FOSL2     | Tamborero             |                   | F-census          |                   |          |          |            |
| 3170   | FOXA2     | Tamborero             |                   | Kandoth.PanCancer |                   |          |          |            |
| 94234  | FOXQ1     | Getz.Signature.All    | Getz.Subset       |                   |                   |          |          |            |
| 84075  | FSCB      | Lawrence              |                   | F-census          |                   |          |          |            |
| 2492   | FSHR      | Lawrence              |                   | F-census          |                   |          |          |            |
| 79695  | GALNT12   | ColoSeq               |                   | BROCA             |                   |          |          |            |
| 117248 | GALNT15   | Lawrence              |                   | F-census          |                   |          |          |            |
| 348654 | GEN1      | F-census              |                   | BROCA             |                   |          |          |            |
| 8328   | GFI1B     | Pediatric.1000Genomes |                   | F-census          |                   |          |          |            |
| 10672  | GNA13     | Getz.Signature.All    | Getz.Subset       |                   |                   |          |          |            |
| 2874   | GPS2      | Getz.Signature.All    | Getz.Subset       | Tamborero         |                   |          |          |            |
| 26585  | GREM1     | ColoSeq               |                   | BROCA             |                   |          |          |            |
| 2913   | GRM3      | Lawrence              |                   | F-census          |                   |          |          |            |
| 2918   | GRM8      | Lawrence              |                   | IonTorrent        |                   |          |          |            |
| 2977   | GUCY1A2   | Lawrence              |                   | F-census          | IonTorrent        |          |          |            |
| 9555   | H2AFY     | Pediatric.1000Genomes |                   | F-census          |                   |          |          |            |
| 440093 | H3F3C     | Tamborero             |                   | Kandoth.PanCancer |                   |          |          |            |
| 10013  | HDAC6     | Pediatric.1000Genomes |                   | F-census          |                   |          |          |            |
| 9734   | HDAC9     | Pediatric.1000Genomes |                   | Lawrence          |                   |          |          |            |
| 3077   | HFE       | F-census              |                   | 114CpGs           |                   |          |          |            |
| 3009   | HIST1H1B  | Pediatric.1000Genomes |                   | F-census          |                   |          |          |            |
| 3006   | HIST1H1C  | Tamborero             |                   | Kandoth.PanCancer | F-census          |          |          |            |
| 3008   | HIST1H1E  | Getz.Signature.All    | Getz.Subset       |                   |                   |          |          |            |
| 3017   | HIST1H2BD | Tamborero             |                   | Kandoth.PanCancer |                   |          |          |            |
| 3105   | HLA-A     | Getz.Signature.All    | Getz.Subset       | Tamborero         | Lawrence          |          |          |            |
| 3106   | HLA-B     | Getz.Signature.All    | Tamborero         |                   |                   |          |          |            |
| 3320   | HSP90AA1  | F-census              | IonTorrent        |                   |                   |          |          |            |
| 26353  | HSPB8     | Lawrence              |                   | F-census          |                   |          |          |            |
| 10075  | HUWE1     | Pediatric.1000Genomes | Tamborero         |                   |                   |          |          |            |
| 22858  | ICK       | F-census              | IonTorrent        |                   |                   |          |          |            |
| 3480   | IGF1R     | F-census              | IonTorrent        |                   |                   |          |          |            |
| 3481   | IGF2      | F-census              | IonTorrent        |                   |                   |          |          |            |
| 3482   | IGF2R     | F-census              | IonTorrent        |                   |                   |          |          |            |
| 3551   | IKBKB     | F-census              | IonTorrent        |                   |                   |          |          |            |
| 3621   | ING1      | Getz.Signature.All    | Getz.Subset       | Tamborero         | F-census          |          |          |            |
| 51147  | ING4      | F-census              | IonTorrent        |                   |                   |          |          |            |
| 26173  | INTS1     | Tamborero             |                   | Lawrence          |                   |          |          |            |
| 8660   | IRS2      | Tamborero             |                   | IonTorrent        |                   |          |          |            |
| 3707   | ITPKB     | Getz.Signature.All    |                   | F-census          |                   |          |          |            |
| 221037 | JMJD1C    | Pediatric.1000Genomes | Tamborero         |                   |                   |          |          |            |
| 8997   | KALRN     | Tamborero             |                   | F-census          |                   |          |          |            |
| 51780  | KDM3B     | Pediatric.1000Genomes |                   | F-census          |                   |          |          |            |
| 23081  | KDM4C     | Pediatric.1000Genomes |                   | F-census          |                   |          |          |            |
| 9817   | KEAP1     | Getz.Signature.All    | Getz.Subset       | Tamborero         | Kandoth.PanCancer | Lawrence | F-census | IonTorrent |
| 54741  | LEPROT    | Tamborero             |                   | Lawrence          |                   |          |          |            |
| 23284  | LPHN3     | Lawrence              |                   | IonTorrent        |                   |          |          |            |
| 145581 | LRFN5     | Lawrence              |                   | F-census          |                   |          |          |            |
| 53353  | LRPIB     | Lawrence              |                   | F-census          | IonTorrent        |          |          |            |
| 4036   | LRP2      | Lawrence              |                   | F-census          |                   |          |          |            |
| 57554  | LRRC7     | Lawrence              |                   | F-census          |                   |          |          |            |
| 120892 | LRRK2     | Tamborero             |                   | Kandoth.PanCancer | Lawrence          | F-census |          |            |
| 80059  | LRRTM4    | Lawrence              |                   | F-census          |                   |          |          |            |
| 4058   | LTK       | F-census              | IonTorrent        |                   |                   |          |          |            |
| 4067   | LYN       | Tamborero             |                   | F-census          |                   |          |          |            |
| 4131   | MAP1B     | Tamborero             |                   | F-census          |                   |          |          |            |
| 4214   | MAP3K1    | Getz.Signature.All    | Getz.Subset       | Tamborero         | Kandoth.PanCancer | F-census |          |            |
| 6885   | MAP3K7    | F-census              | IonTorrent        |                   |                   |          |          |            |
| 5594   | MAPK1     | F-census              | IonTorrent        |                   |                   |          |          |            |
| 5599   | MAPK8     | F-census              | IonTorrent        |                   |                   |          |          |            |

|        |          |                       |                    |                   |                   |                   |            |  |
|--------|----------|-----------------------|--------------------|-------------------|-------------------|-------------------|------------|--|
| 9479   | MAPK8IP1 | Tamborero             | Kandoth.PanCancer  |                   |                   |                   |            |  |
| 4139   | MARK1    | F-census              | IonTorrent         |                   |                   |                   |            |  |
| 57787  | MARK4    | F-census              | IonTorrent         |                   |                   |                   |            |  |
| 4145   | MATK     | Tamborero             | F-census           |                   |                   |                   |            |  |
| 4152   | MBD1     | Pediatric.1000Genomes | Getz.Signature.All | IonTorrent        |                   |                   |            |  |
| 4170   | MCL1     | F-census              | IonTorrent         |                   |                   |                   |            |  |
| 9656   | MDC1     | Pediatric.1000Genomes | Tamborero          |                   |                   |                   |            |  |
| 9969   | MED13    | Tamborero             | F-census           |                   |                   |                   |            |  |
| 23269  | MGA      | Getz.Signature.All    | Tamborero          |                   |                   |                   |            |  |
| 4321   | MMP12    | Tamborero             | F-census           |                   |                   |                   |            |  |
| 4313   | MMP2     | Tamborero             | F-census           | IonTorrent        |                   |                   |            |  |
| 4353   | MPO      | Getz.Signature.All    | F-census           |                   |                   |                   |            |  |
| 4361   | MRE11A   | F-census              | IonTorrent         | BROCA             |                   |                   |            |  |
| 4507   | MTAP     | F-census              | 114CpGs            |                   |                   |                   |            |  |
| 2475   | MTOR     | Getz.Signature.All    | Getz.Subset        | Tamborero         | Kandoth.PanCancer | F-census          | IonTorrent |  |
| 94025  | MUC16    | Lawrence              | F-census           |                   |                   |                   |            |  |
| 140453 | MUC17    | Getz.Signature.All    | F-census           |                   |                   |                   |            |  |
| 4585   | MUC4     | Lawrence              | F-census           |                   |                   |                   |            |  |
| 25878  | MXRA5    | Getz.Signature.All    | Getz.Subset        |                   |                   |                   |            |  |
| 4619   | MYH1     | Lawrence              | F-census           |                   |                   |                   |            |  |
| 4620   | MYH2     | Lawrence              | F-census           |                   |                   |                   |            |  |
| 89796  | NAV1     | Tamborero             | F-census           |                   |                   |                   |            |  |
| 89795  | NAV3     | Tamborero             | Kandoth.PanCancer  | Lawrence          | F-census          |                   |            |  |
| 8202   | NCOA3    | Tamborero             | F-census           |                   |                   |                   |            |  |
| 9611   | NCOR1    | Pediatric.1000Genomes | Getz.Signature.All | Getz.Subset       | Tamborero         | Kandoth.PanCancer |            |  |
| 9612   | NCOR2    | Pediatric.1000Genomes | Tamborero          | F-census          |                   |                   |            |  |
| 23327  | NEDD4L   | Tamborero             | F-census           |                   |                   |                   |            |  |
| 284086 | NEK8     | Tamborero             | F-census           |                   |                   |                   |            |  |
| 4778   | NFE2     | Pediatric.1000Genomes | F-census           |                   |                   |                   |            |  |
| 4790   | NFKB1    | F-census              | IonTorrent         |                   |                   |                   |            |  |
| 4855   | NOTCH4   | F-census              | IonTorrent         |                   |                   |                   |            |  |
| 23742  | NPAP1    | Lawrence              | F-census           |                   |                   |                   |            |  |
| 81327  | OR4A16   | Getz.Signature.All    | Lawrence           |                   |                   |                   |            |  |
| 5063   | PAK3     | Getz.Signature.All    | Getz.Subset        | Tamborero         | Kandoth.PanCancer | F-census          |            |  |
| 5071   | PARK2    | Lawrence              | F-census           |                   |                   |                   |            |  |
| 5093   | PCBP1    | Getz.Signature.All    | Tamborero          | Kandoth.PanCancer |                   |                   |            |  |
| 27328  | PCDH11X  | Lawrence              | F-census           |                   |                   |                   |            |  |
| 65217  | PCDH15   | Lawrence              | F-census           |                   |                   |                   |            |  |
| 51230  | PHF20    | Pediatric.1000Genomes | F-census           |                   |                   |                   |            |  |
| 55023  | PHIP     | Pediatric.1000Genomes | F-census           |                   |                   |                   |            |  |
| 5291   | PIK3CB   | Tamborero             | F-census           | IonTorrent        |                   |                   |            |  |
| 5294   | PIK3CG   | Tamborero             | Kandoth.PanCancer  | Lawrence          | F-census          | IonTorrent        |            |  |
| 5296   | PIK3R2   | F-census              | IonTorrent         |                   |                   |                   |            |  |
| 5314   | PKHD1    | Lawrence              | F-census           | IonTorrent        |                   |                   |            |  |
| 5335   | PLCG1    | Tamborero             | IonTorrent         |                   |                   |                   |            |  |
| 5336   | PLCG2    | Getz.Signature.All    | F-census           |                   |                   |                   |            |  |
| 5424   | POLD1    | F-census              | 114CpGs            | ColoSeq           | BROCA             |                   |            |  |
| 5426   | POLE     | Getz.Signature.All    | Getz.Subset        | Tamborero         | 114CpGs           | ColoSeq           | BROCA      |  |
| 10721  | POLQ     | F-census              | 114CpGs            |                   |                   |                   |            |  |
| 728378 | POTEF    | Tamborero             | F-census           |                   |                   |                   |            |  |
| 5452   | POU2F2   | Getz.Signature.All    | Getz.Subset        | F-census          |                   |                   |            |  |
| 8493   | PPM1D    | Getz.Signature.All    | F-census           |                   |                   |                   |            |  |
| 5506   | PPP1R3A  | Lawrence              | F-census           |                   |                   |                   |            |  |
| 5537   | PPP6C    | Getz.Signature.All    | Getz.Subset        |                   |                   |                   |            |  |
| 7799   | PRDM2    | Tamborero             | F-census           |                   |                   |                   |            |  |
| 56979  | PRDM9    | Pediatric.1000Genomes | Lawrence           | F-census          |                   |                   |            |  |
| 80243  | PREX2    | Lawrence              | F-census           |                   |                   |                   |            |  |
| 5580   | PRKCD    | Tamborero             | F-census           |                   |                   |                   |            |  |
| 5591   | PRKDC    | Pediatric.1000Genomes | F-census           | IonTorrent        |                   |                   |            |  |
| 7916   | PRRC2A   | Tamborero             | F-census           |                   |                   |                   |            |  |
| 136541 | PRSS58   | 114CpGs               | BROCA              |                   |                   |                   |            |  |
| 57716  | PRX      | Tamborero             | Kandoth.PanCancer  |                   |                   |                   |            |  |
| 5743   | PTGS2    | F-census              | IonTorrent         |                   |                   |                   |            |  |
| 5783   | PTPN13   | Tamborero             | F-census           |                   |                   |                   |            |  |
| 5789   | PTPRD    | F-census              | IonTorrent         |                   |                   |                   |            |  |
| 11122  | PTPRT    | Lawrence              | IonTorrent         |                   |                   |                   |            |  |
| 9444   | QKI      | Getz.Signature.All    | Tamborero          |                   |                   |                   |            |  |
| 10111  | RAD50    | IonTorrent            | BROCA              |                   |                   |                   |            |  |
| 5888   | RAD51    | F-census              | BROCA              |                   |                   |                   |            |  |
| 5889   | RAD51C   | Illumina              | 114CpGs            | BROCA             |                   |                   |            |  |
| 5892   | RAD51D   | Illumina              | 114CpGs            | BROCA             |                   |                   |            |  |
| 5896   | RAG1     | Tamborero             | F-census           |                   |                   |                   |            |  |
| 5903   | RANBP2   | Tamborero             | F-census           |                   |                   |                   |            |  |
| 5933   | RBL1     | Lawrence              | F-census           |                   |                   |                   |            |  |
| 8241   | RBM10    | Getz.Signature.All    | Getz.Subset        | Tamborero         | F-census          |                   |            |  |
| 79651  | RHBDF2   | Illumina              | 114CpGs            |                   |                   |                   |            |  |
| 6009   | RHEB     | Getz.Signature.All    | Tamborero          |                   |                   |                   |            |  |

|        |               |                                                                                                                                                                                         |                    |                   |                   |                   |            |  |
|--------|---------------|-----------------------------------------------------------------------------------------------------------------------------------------------------------------------------------------|--------------------|-------------------|-------------------|-------------------|------------|--|
| 387    | RHOA          | Getz.Signature.All                                                                                                                                                                      | Tamborero          | F-census          |                   |                   |            |  |
| 9699   | RIMS2         | Lawrence                                                                                                                                                                                | F-census           |                   |                   |                   |            |  |
| 6023   | RMRP          | F-census                                                                                                                                                                                | 114CpGs            |                   |                   |                   |            |  |
| 6041   | RNASEL        | F-census                                                                                                                                                                                | IonTorrent         |                   |                   |                   |            |  |
| 6209   | RPS15         | Getz.Signature.All                                                                                                                                                                      | F-census           |                   |                   |                   |            |  |
| 6187   | RPS2          | Getz.Signature.All                                                                                                                                                                      | F-census           |                   |                   |                   |            |  |
| 6196   | RPS6KA2       | F-census                                                                                                                                                                                | IonTorrent         |                   |                   |                   |            |  |
| 6240   | RRM1          | F-census                                                                                                                                                                                | IonTorrent         |                   |                   |                   |            |  |
| 340419 | RSPO2         | Lawrence                                                                                                                                                                                | F-census           |                   |                   |                   |            |  |
| 51319  | RSRC1         | Tamborero                                                                                                                                                                               | Lawrence           |                   |                   |                   |            |  |
| 6256   | RXRA          | Getz.Signature.All                                                                                                                                                                      | Tamborero          |                   |                   |                   |            |  |
| 54809  | SAMD9         | F-census                                                                                                                                                                                | IonTorrent         |                   |                   |                   |            |  |
| 6389   | SDHA          | 114CpGs                                                                                                                                                                                 | IonTorrent         |                   |                   |                   |            |  |
| 390502 | SERPINA2      | Pediatric.1000Genomes                                                                                                                                                                   | Tamborero          | Kandoth.PanCancer | IonTorrent        | BROCA             |            |  |
| 5054   | SERPINE1      | Pediatric.1000Genomes                                                                                                                                                                   | F-census           |                   |                   |                   |            |  |
| 9869   | SETDB1        | Pediatric.1000Genomes                                                                                                                                                                   | Getz.Signature.All |                   |                   |                   |            |  |
| 6446   | SGK1          | Getz.Signature.All                                                                                                                                                                      | Getz.Subset        | Tamborero         | IonTorrent        |                   |            |  |
| 4068   | SH2D1A        | 114CpGs                                                                                                                                                                                 | IonTorrent         |                   |                   |                   |            |  |
| 25942  | SIN3A         | Pediatric.1000Genomes                                                                                                                                                                   | Tamborero          | Kandoth.PanCancer |                   |                   |            |  |
| 1811   | SLC26A3       | Getz.Signature.All                                                                                                                                                                      | F-census           |                   |                   |                   |            |  |
| 26050  | SLITRK5       | Lawrence                                                                                                                                                                                | F-census           |                   |                   |                   |            |  |
| 4087   | SMAD2         | Getz.Signature.All                                                                                                                                                                      | Getz.Subset        | Tamborero         | Kandoth.PanCancer | F-census          | IonTorrent |  |
| 8243   | SMC1A         | Pediatric.1000Genomes                                                                                                                                                                   | Getz.Signature.All | Getz.Subset       | Tamborero         | Kandoth.PanCancer |            |  |
| 9126   | SMC3          | Getz.Signature.All                                                                                                                                                                      | Getz.Subset        | Tamborero         | Kandoth.PanCancer |                   |            |  |
| 6654   | SOS1          | Getz.Signature.All                                                                                                                                                                      | Tamborero          | Kandoth.PanCancer | 114CpGs           |                   |            |  |
| 64321  | SOX17         | Getz.Signature.All                                                                                                                                                                      | Getz.Subset        | Tamborero         | Kandoth.PanCancer |                   |            |  |
| 6662   | SOX9          | Tamborero                                                                                                                                                                               | Kandoth.PanCancer  |                   |                   |                   |            |  |
| 8405   | SPOP          | Getz.Signature.All                                                                                                                                                                      | Getz.Subset        | Tamborero         | Kandoth.PanCancer |                   |            |  |
| 6709   | SPTAN1        | Tamborero                                                                                                                                                                               | F-census           |                   |                   |                   |            |  |
| 6714   | SRC           | Pediatric.1000Genomes                                                                                                                                                                   | F-census           | IonTorrent        |                   |                   |            |  |
| 10847  | SRCAP         | Pediatric.1000Genomes                                                                                                                                                                   | Tamborero          |                   |                   |                   |            |  |
| 8859   | STK19         | Getz.Signature.All                                                                                                                                                                      | Getz.Subset        | F-census          |                   |                   |            |  |
| 27148  | STK36         | F-census                                                                                                                                                                                | IonTorrent         |                   |                   |                   |            |  |
| 6789   | STK4          | Tamborero                                                                                                                                                                               | F-census           |                   |                   |                   |            |  |
| 23345  | SYNE1         | Tamborero                                                                                                                                                                               | IonTorrent         |                   |                   |                   |            |  |
| 8831   | SYNGAP1       | Getz.Signature.All                                                                                                                                                                      | Getz.Subset        | Tamborero         | F-census          |                   |            |  |
| 6872   | TAF1          | Pediatric.1000Genomes                                                                                                                                                                   | Tamborero          | Kandoth.PanCancer | F-census          | IonTorrent        |            |  |
| 138474 | TAF1L         | Pediatric.1000Genomes                                                                                                                                                                   | Lawrence           | F-census          | IonTorrent        |                   |            |  |
| 79718  | TBL1XR1       | Getz.Signature.All                                                                                                                                                                      | Getz.Subset        | Tamborero         | Kandoth.PanCancer | F-census          |            |  |
| 9096   | TBX18         | Lawrence                                                                                                                                                                                | F-census           |                   |                   |                   |            |  |
| 50945  | TBX22         | Lawrence                                                                                                                                                                                | F-census           | IonTorrent        |                   |                   |            |  |
| 6926   | TBX3          | Getz.Signature.All                                                                                                                                                                      | Tamborero          | Kandoth.PanCancer |                   |                   |            |  |
| 6921   | TCEB1         | Getz.Signature.All                                                                                                                                                                      | Getz.Subset        |                   |                   |                   |            |  |
| 6932   | TCF7          | Tamborero                                                                                                                                                                               | F-census           |                   |                   |                   |            |  |
| 7048   | TGFBR2        | Getz.Signature.All                                                                                                                                                                      | Getz.Subset        | Tamborero         | Kandoth.PanCancer | F-census          | IonTorrent |  |
| 7057   | THBS1         | F-census                                                                                                                                                                                | IonTorrent         |                   |                   |                   |            |  |
| 7099   | TLR4          | Tamborero                                                                                                                                                                               | Kandoth.PanCancer  | F-census          | IonTorrent        |                   |            |  |
| 55654  | TMEM127       | Illumina                                                                                                                                                                                | 114CpGs            |                   |                   |                   |            |  |
| 7124   | TNF           | Getz.Signature.All                                                                                                                                                                      | F-census           |                   |                   |                   |            |  |
| 10188  | TNK2          | F-census                                                                                                                                                                                | IonTorrent         |                   |                   |                   |            |  |
| 63923  | TNN           | Lawrence                                                                                                                                                                                | F-census           |                   |                   |                   |            |  |
| 7143   | TNR           | Lawrence                                                                                                                                                                                | F-census           |                   |                   |                   |            |  |
| 7158   | TP53BP1       | Getz.Signature.All                                                                                                                                                                      | Tamborero          | BROCA             |                   |                   |            |  |
| 7187   | TRAF3         | Getz.Signature.All                                                                                                                                                                      | Getz.Subset        | F-census          |                   |                   |            |  |
| 50852  | TRAT1         | Lawrence                                                                                                                                                                                | F-census           |                   |                   |                   |            |  |
| 57616  | TSHZ3         | Kandoth.PanCancer                                                                                                                                                                       | Lawrence           |                   |                   |                   |            |  |
| 51366  | UBR5          | Pediatric.1000Genomes                                                                                                                                                                   | F-census           | IonTorrent        |                   |                   |            |  |
| 29128  | UHRF1         | Pediatric.1000Genomes                                                                                                                                                                   | F-census           |                   |                   |                   |            |  |
| 115426 | UHRF2         | Pediatric.1000Genomes                                                                                                                                                                   | F-census           |                   |                   |                   |            |  |
| 440279 | UNC13C        | Lawrence                                                                                                                                                                                | F-census           |                   |                   |                   |            |  |
| 7874   | USP7          | Pediatric.1000Genomes                                                                                                                                                                   | F-census           |                   |                   |                   |            |  |
| 8239   | USP9X         | Tamborero                                                                                                                                                                               | Kandoth.PanCancer  | IonTorrent        |                   |                   |            |  |
| 129446 | XIRP2         | Getz.Signature.All                                                                                                                                                                      | Lawrence           |                   |                   |                   |            |  |
| 7516   | XRCC2         | IonTorrent                                                                                                                                                                              | BROCA              |                   |                   |                   |            |  |
| 7528   | YY1           | Pediatric.1000Genomes                                                                                                                                                                   | F-census           |                   |                   |                   |            |  |
| 9839   | ZEB2          | Tamborero                                                                                                                                                                               | F-census           |                   |                   |                   |            |  |
| 463    | ZFH3          | Getz.Signature.All                                                                                                                                                                      | Getz.Subset        | Tamborero         | F-census          |                   |            |  |
| 677    | ZFP36L1       | Tamborero                                                                                                                                                                               | F-census           |                   |                   |                   |            |  |
| 678    | ZFP36L2       | Tamborero                                                                                                                                                                               | F-census           |                   |                   |                   |            |  |
| 9202   | ZMYM4         | Pediatric.1000Genomes                                                                                                                                                                   | Tamborero          | F-census          |                   |                   |            |  |
| 23613  | ZMYND8        | Pediatric.1000Genomes                                                                                                                                                                   | Tamborero          | F-census          |                   |                   |            |  |
| 7644   | ZNF91         | Tamborero                                                                                                                                                                               | Lawrence           |                   |                   |                   |            |  |
| 90     | ACVR1         | <a href="http://www.nature.com/pr/journal/v75/n1-2/full/pr2013194a.html">http://www.nature.com/pr/journal/v75/n1-2/full/pr2013194a.html</a>                                             |                    |                   |                   |                   |            |  |
| 57492  | <b>ARID1B</b> | <a href="http://www.nature.com/myaccess.library.utoronto.ca/ng/journal/v45/n1/pdf/ng.2493.pdf">http://www.nature.com/myaccess.library.utoronto.ca/ng/journal/v45/n1/pdf/ng.2493.pdf</a> |                    |                   |                   |                   |            |  |
| 55601  | DDX60         | <a href="http://www.ncbi.nlm.nih.gov/pubmed/22722829">http://www.ncbi.nlm.nih.gov/pubmed/22722829</a>                                                                                   |                    |                   |                   |                   |            |  |
| 9681   | DEPDC5        | <a href="http://www.ncbi.nlm.nih.gov/pubmed/22722829">http://www.ncbi.nlm.nih.gov/pubmed/22722829</a>                                                                                   |                    |                   |                   |                   |            |  |
| 127602 | DNAH14        | <a href="http://www.ncbi.nlm.nih.gov/pubmed/22722829">http://www.ncbi.nlm.nih.gov/pubmed/22722829</a>                                                                                   |                    |                   |                   |                   |            |  |



|  |  |  |  |  |  |  |  |  |
|--|--|--|--|--|--|--|--|--|
|  |  |  |  |  |  |  |  |  |
|  |  |  |  |  |  |  |  |  |
