# Supplementary material for: Identification of complex genomic rearrangements in cancers using CouGaR
Source: PubMed Central journal article supplement — Genome Res. 2017 Jan;27(1):107–17. doi: 10.1101/gr.211201.116 (PMC5204335; doi:10.1101/gr.211201.116), 2017-01
Supplement: supp_gr.211201.116_Supplemental_Table_S7.pdf [file supp_gr.211201.116_Supplemental_Table_S7.pdf]

| Tumour | Significant Genes (sample count, pvalue)                                                                                                                                                                                                                                                                                                                                                                                                                                                                                                                                                                                                                                                                                                                                                                                                                                                                                                                                                                                                                                                                                                                                                                                                                                                                                                                                                                                                                                                                                                                                                                                                                                                                                                                                                                                                                                                                                                                                                                                                                                                                                                                                                                                                                                                                                                                                                                                                                                 | OncoGene Significance |
|--------|--------------------------------------------------------------------------------------------------------------------------------------------------------------------------------------------------------------------------------------------------------------------------------------------------------------------------------------------------------------------------------------------------------------------------------------------------------------------------------------------------------------------------------------------------------------------------------------------------------------------------------------------------------------------------------------------------------------------------------------------------------------------------------------------------------------------------------------------------------------------------------------------------------------------------------------------------------------------------------------------------------------------------------------------------------------------------------------------------------------------------------------------------------------------------------------------------------------------------------------------------------------------------------------------------------------------------------------------------------------------------------------------------------------------------------------------------------------------------------------------------------------------------------------------------------------------------------------------------------------------------------------------------------------------------------------------------------------------------------------------------------------------------------------------------------------------------------------------------------------------------------------------------------------------------------------------------------------------------------------------------------------------------------------------------------------------------------------------------------------------------------------------------------------------------------------------------------------------------------------------------------------------------------------------------------------------------------------------------------------------------------------------------------------------------------------------------------------------------|-----------------------|
| LGG    | <b>MRPS17</b> , (16, 8.6e-07); <b>EGFR</b> , (11, 9.8e-07); <b>SEC61G</b> , (10, 1.0e-06); <b>*VOPP1</b> , <b>*LANCL2</b> , (9, 1.09e-06);                                                                                                                                                                                                                                                                                                                                                                                                                                                                                                                                                                                                                                                                                                                                                                                                                                                                                                                                                                                                                                                                                                                                                                                                                                                                                                                                                                                                                                                                                                                                                                                                                                                                                                                                                                                                                                                                                                                                                                                                                                                                                                                                                                                                                                                                                                                               |                       |
| OV     | <b>*ZNF709</b> , ZNF788, (38, 4.6e-08); <b>*ZNF763</b> , (34, 5.9e-08); <b>*CYP4F3</b> , OR10H5, PGLYRP2, OR111, WIZ, OR10H2, OR10H3, CYP4F2, <b>*CYP4F11</b> , <b>*AKAP8L</b> , ILVBL, RASAL3, CYP4F22, OR10H1, SYDE1, EPHX3, <b>*NOTCH3</b> , CYP4F12, (20, 1.06e-07); <b>*ZNF564</b> , RTBDN, IER2, ZNF333, RLN3, <b>*RFX1</b> , OR7A17, ZNF799, PALM3, GADD45GIP1, <b>*MAST1</b> , ZNF442, ZNF443, ZNF563, <b>*AKAP8</b> , OR7A10, <b>*BRD4</b> , <b>*CCDC130</b> , NFIX, KLF1, <b>*ZNF44</b> , <b>*CACNA1A</b> , CTD-2192J16.24, <b>*CCDC105</b> , CALR, RAD23A, OR7C1, CTD-3105H18.16, DCAF15, OR7A5, NACC1, TRMT1, ZNF625, WDR83, SYCE2, ZNF878, DAND5, DNASE2, NDUFB7, TNPO2, PRKACA, GIPC1, ZNF791, PTGER1, LYL1, C19orf67, ASF1B, FARSA, C19orf53, NANOS3, STX10, ASNA1, LPHN1, HOOK2, PODNL1, C19orf43, MRI1, OR7C2, CD97, DDX39A, <b>*SLC1A6</b> , ZNF20, SAMD1, CC2D1A, AC090427.1, <b>*ZNF433</b> , ZSWIM4, <b>*ZNF490</b> , GCDH, CASP14, <b>*RNASEH2A</b> , WDR83OS, hsa-mir-1199, IL27RA, ZNF136, PKN1, EMR2, <b>*TECR</b> , ZNF844, <b>*CLEC17A</b> , C19orf57, FBXW9, DNAJB1, DHPS, EMR3, MAN2B1, <b>*BEST2</b> , PRDX2, JUNB, AC008686.1, (19, 1.06e-07); <b>SLC44A2</b> , ZNF439, ZNF440, ECSIT, DKFZP761J1410, <b>*ZNF627</b> , ZNF69, <b>*ELOF1</b> , AC011475.1, PRKCSH, CARM1, LDLR, SPC24, YIPF2, CCDC159, C19orf52, SWSAP1, KANK2, TMEM205, ZNF653, <b>*RAB3D</b> , <b>*RGL3</b> , ZNF491, ZNF441, C19orf38, ZNF823, CCDC151, ACP5, <b>*SMARCA4</b> , <b>*TSPAN16</b> , DOCK6, C19orf80, TMED1, CNN1, QTRT1, ELAVL3, ILF3, CCNE1, <b>*C19orf12</b> , PLEKHF1, (17, 1.12e-07); <b>S1PR5</b> , OCEL1, P2RY11, <b>*EPOR</b> , ATG4D, ICAM5, TMEM221, SMIM7, SLC27A1, RAB8A, <b>*FAM129C</b> , DDA1, KRI1, CTC-429P9.4, USE1, SIN3B, RAVR1, MED26, DNMT1, ANO8, NWD1, EPS15L1, S1PR2, CHERP, MRPL4, <b>*GTPBP3</b> , F2RL3, MVB12A, TMEM38A, CIB3, PPAN-P2RY11, BST2, CTD-2521M24.10, AP1M2, ABHD8, NXNL1, C19orf44, AP1M1, FAM32A, PLVAP, USHBP1, SLC35E1, ZGLP1, EIF3G, OR10H4, CDKN2D, NR2F6, AC010646.3, ICAM3, ICAM1, PPAN, CALR3, PGLS, FDX1L, HSH2D, CDC37, KLF2, TPM4, MRPL34, TYK2, <b>*ANGPTL6</b> , KEAP1, ICAM4, <b>*PDE4A</b> , BABAM1, ANKLE1, <b>*OC90</b> , <b>*UR11</b> , <b>*DNM2</b> , POP4, VSTM2B, (16, 1.15e-07); <b>*CPAMD8</b> , <b>*MYO9B</b> , <b>*C19orf66</b> , HAUS8, RDH8, (15, 3.9e-05); UQCRFS1, <b>*COL5A3</b> , <b>*ZNF536</b> , <b>*WDR88</b> , CEBPA, LRP3, AC020952.1, <b>*SLC7A10</b> , HOXC4, (14, 4.5e-4) | 0.047                 |
| ESCA   | <b>FGF4</b> , <b>*FGF3</b> , <b>*PPF1A1</b> , FADD, <b>*CTTN</b> , AP001888.1, <b>*ANO1</b> , (16, 2.2e-07); <b>FGF19</b> , ORAOV1, <b>*CCND1</b> , (15, 2.2e-07);                                                                                                                                                                                                                                                                                                                                                                                                                                                                                                                                                                                                                                                                                                                                                                                                                                                                                                                                                                                                                                                                                                                                                                                                                                                                                                                                                                                                                                                                                                                                                                                                                                                                                                                                                                                                                                                                                                                                                                                                                                                                                                                                                                                                                                                                                                       | 0.002                 |
| HNSC   | <b>*PPF1A1</b> , FADD, <b>*CTTN</b> , <b>*ANO1</b> , (29, 0.003); <b>FGF4</b> , <b>*FGF3</b> , <b>FGF19</b> , ORAOV1, AP001888.1, <b>*CCND1</b> , (28, 0.004);                                                                                                                                                                                                                                                                                                                                                                                                                                                                                                                                                                                                                                                                                                                                                                                                                                                                                                                                                                                                                                                                                                                                                                                                                                                                                                                                                                                                                                                                                                                                                                                                                                                                                                                                                                                                                                                                                                                                                                                                                                                                                                                                                                                                                                                                                                           | 1.90E-05              |
| UCEC   | <b>EFNA3</b> , (14, 7.1e-08);                                                                                                                                                                                                                                                                                                                                                                                                                                                                                                                                                                                                                                                                                                                                                                                                                                                                                                                                                                                                                                                                                                                                                                                                                                                                                                                                                                                                                                                                                                                                                                                                                                                                                                                                                                                                                                                                                                                                                                                                                                                                                                                                                                                                                                                                                                                                                                                                                                            | 2.10E-05              |
| SKCM   | <b>*NARS2</b> , (33, 6.0e-08); UCP2, P2RY2, INTS4, AQP11, <b>*P4HA3</b> , COA4, TPBGL, <b>*NEU3</b> , MRPL48, RPS3, POLD3, MOGAT2, <b>*GAB2</b> , <b>*C2CD3</b> , <b>*UVRAG</b> , SPCS2, <b>*B3GNT6</b> , <b>*FAM168A</b> , THRSP, OR2AT4, DNAJB13, SERPINH1, OMP, <b>*LRRC32</b> , GDDP5, <b>*GDDP4</b> , NDUFC2, <b>*ARHGEF17</b> , KCNE3, AAMDC, <b>*DGAT2</b> , <b>*ACER3</b> , XRRA1, KLHL35, <b>*PAK1</b> , PPME1, P2RY6, <b>*SLCO2B1</b> , DKFZP434E11119, <b>*C11orf30</b> , <b>*RELT</b> , CLNS1A, <b>*CAPN5</b> , RSF1, WNT11, <b>*RP11-111M22.2</b> , CHRDL2, <b>*PGM2L1</b> , USP35, RAB6A, TSKU, UCP3, LIPT2, KCTD14, <b>*MAP6</b> , KCTD21, ALG8, <b>*PAAF1</b> , ARRB1, PLEKHB1, NDUFC2-KCTD14, PRKRIR, (32, 6.4e-08); <b>*RNF169</b> , (31, 6.7e-08); <b>*RAB38</b> , CCDC81, PRSS23, <b>*MYO7A</b> , <b>*TENM4</b> , <b>*ME3</b> , <b>*GRM5</b> , <b>*TMEM135</b> , FZD4, <b>*TYR</b> , (30, 7.0e-08); <b>*SYTL2</b> , TMEM126B, CCDC89, CREBZF, TMEM126A, (29, 7.3e-08); PICALM, <b>*DLG2</b> , AP000974.1, ANKRD42, <b>*CCDC90B</b> , EED, C11orf82, <b>*PCF11</b> , FAM181B, <b>*C11orf73</b> , <b>*PRCP</b> , RAB30, CCDC83, (28, 7.6e-08); <b>*CTSC</b> , (25, 8.5e-08); TNFAIP8L3, HDC, AP4E1, MYEF2, MYO5C, CTXN2, CEP152, TMOD3, <b>*SEMA6D</b> , COPS2, FKSG62, DUT, LYSMD2, TRPM7, GALK2, CYP19A1, BCL2L10, FAM227B, SLC27A2, SPPL2A, <b>*SLC12A1</b> , TMOD2, MAPK6, FGF7, GABPB1, GLDN, ATP8B4, USP8, SECISBP2L, USP50, DTWD1, SLC24A5, EID1, GNB5, DMXL2, <b>*LEO1</b> , SHC4, SCG3, FBN1, (24, 9.0e-05);                                                                                                                                                                                                                                                                                                                                                                                                                                                                                                                                                                                                                                                                                                                                                                                                                                                                                                                                  |                       |
| GBM    | ZNF479, (50, 1.1e-08); ZNF716, (48, 1.9e-08); POM121L12, (47, 2.2e-08); <b>*COBL</b> , <b>*GRB10</b> , DDC, <b>*IKZF1</b> , (43, 3.8e-08); LRIG3, <b>*RP11-362K2.2</b> , <b>*FIGLN1</b> , C7orf72, VWC2, (42, 4.2e-08); <b>*ZPBP</b> , (41, 4.5e-08); PKD1L1, C7orf69, C7orf57, C7orf65, UPP1, <b>*SUN3</b> , HUS1, AC004899.1, <b>*SRGAP1</b> , RP11-272B17.2, <b>*SLC16A7</b> , C12orf66, XPOT, <b>*CAND1</b> , AC025262.1, <b>*DPY19L2</b> , AVPR1A, TMEM5, <b>*TBC1D30</b> , GNS, <b>*TBK1</b> , C12orf56, <b>*RASSF3</b> , (38, 5.7e-08); <b>*TSPAN31</b> , CDK4, <b>*TNS3</b> , <b>*ABCA13</b> , AC090673.2, LLPH, TMBIM4, <b>*MON2</b> , <b>*HELB</b> , <b>*WIF1</b> , <b>*GRIP1</b> , <b>*USP15</b> , IRAK3, <b>*LEMD3</b> , HMGA2, <b>*MSRB3</b> , C12orf61, RP11-366L20.2, <b>*FAM19A2</b> , (37, 6.1e-08); CTDSP2, RP11-571M6.15, TSFM, METTL21B, METTL1, <b>*CYP27B1</b> , IFNG, (36, 6.4e-08); XRCC6BP1, AC006455.1, AC073188.1, IL22, <b>*PPM1H</b> , <b>*IL26</b> , <b>*DYRK2</b> , MDM1, (35, 6.8e-08); <b>*AVIL</b> , <b>*AGAP2</b> , OS9, AGAP2-AS1, IGFBP3, RAMP3, ADCY1, AC096582.1, <b>*IGFBP1</b> , ZNF727, ZNF736, ZNF273, ZNF138, ZNF107, <b>*ZNF680</b> , ZNF679, ZNF117, ERV3-1, MDM2, (34, 7.2e-08); AC011294.3, ZNF92, <b>*AC124890.1</b> , (33, 7.6e-08); <b>*RAP1B</b> , (32, 8.e-08); <b>*MARCH9</b> , (31, 8.4e-08); <b>*AQP1</b> , <b>*SLC35E3</b> , (30, 8.7e-08); <b>*NUP107</b> , (29, 8.6e-07); <b>*NUDCD3</b> , NACAD, CCM2, MYO1G, TBRG4, PPIA, YKT6, POLD2, ZMIZ2, <b>*GCK</b> , TMED4, MYL7, DDX56, AEBP1, NPC1L1, POLM, OGDH, <b>*CAMK2B</b> , (28, 4.1e-05);                                                                                                                                                                                                                                                                                                                                                                                                                                                                                                                                                                                                                                                                                                                                                                                                                                                                  |                       |
| LUSC   | HTR3C, DVL3, MAP6D1, HTR3E, ABC5, <b>*KLHL24</b> , ECE2, ABCF3, PARL, ALG3, YEATS2, VWA5B2, AP2M1, HTR3D, CAMK2N2, (30, 6.3e-08); CHR1, POLR2H, <b>*ATP11B</b> , RP11-433C9.2, KLHL6, LAMP3, FAM131A, <b>*MCCC1</b> , EIF4G1, THPO, CLCN2, <b>*EIF2B5</b> , MAGEF1, EPHB3, <b>*PSMD2</b> , <b>*DCUN1D1</b> , (29, 6.5e-08); <b>*B3GNT5</b> , EHHADH, MAP3K13, <b>*C3orf70</b> , <b>*MCF2L2</b> , <b>*CCDC39</b> , SOX2, <b>*VPS8</b> , TTC14, <b>*TMEM41A</b> , <b>*GPR160</b> , <b>*TNIK</b> , RPL22L1, PLD1, TNFSF10, TMEM212, PP13439, <b>*EIF5A2</b> , GHSR, SLC2A2, AC092964.1, <b>*NCEH1</b> , AC007919.2, AC092964.2, <b>*FNDC3B</b> , (28, 6.8e-08); DNAJC19, <b>*FXR1</b> , MRPL47, ACTL6A, <b>*PIK3CA</b> , <b>*SAMD7</b> , <b>*ZMAT3</b> , USP13, <b>*MECOM</b> , SI, SKIL, <b>*ECT2</b> , <b>*NDUFB5</b> , BCHE, SEC62, <b>*KCNMB2</b> , <b>*CLDN11</b> , <b>*SLITRK3</b> , LRRC31, <b>*MYNN</b> , PRKCI, <b>*KCNMB3</b> , <b>*SPATA16</b> , GNB4, <b>*TBL1XR1</b> , LRRIQ4, ACTRT3, LRRC34, ZNF639, <b>*SLC7A14</b> , <b>*PHC3</b> , MFN1, (27, 7.1e-08); <b>*SERPINI1</b> , <b>*SERPINI2</b> , <b>*PEX5L</b> , <b>*WDR49</b> , <b>*NLGN1</b> , <b>*ZBBX</b> , <b>*GOLIM4</b> , <b>*NAALADL2</b> , <b>*PDCD10</b> , (26, 7.4e-08); <b>*LIPH</b> , TRA2B, C3orf65, <b>*IGF2BP2</b> , SENP2, (25, 7.6e-08); ETV5, RTP1, RFC4, AHSG, EIF4A2, DGKG, HRG, KNG1, ADIPOQ, TBCCD1, RPL39L, CRYGS, DNAJB11, FETUB, ST6GAL1, ARL14, (21, 5.2e-05);                                                                                                                                                                                                                                                                                                                                                                                                                                                                                                                                                                                                                                                                                                                                                                                                                                                                                                                                                                                                                    |                       |
| BRCA   | ZFP41, (8, 3.4e-07);                                                                                                                                                                                                                                                                                                                                                                                                                                                                                                                                                                                                                                                                                                                                                                                                                                                                                                                                                                                                                                                                                                                                                                                                                                                                                                                                                                                                                                                                                                                                                                                                                                                                                                                                                                                                                                                                                                                                                                                                                                                                                                                                                                                                                                                                                                                                                                                                                                                     |                       |
