# Supplementary material for: Identification of complex genomic rearrangements in cancers using CouGaR
Source: PubMed Central journal article supplement — Genome Res. 2017 Jan;27(1):107–17. doi: 10.1101/gr.211201.116 (PMC5204335; doi:10.1101/gr.211201.116), 2017-01
Supplement: supp_gr.211201.116_Supplemental_Table_S8.pdf [file supp_gr.211201.116_Supplemental_Table_S8.pdf]

| Tumour | Significant Genes (sample count, pvalue)                                                                                      | OncoGene Significance |
|--------|-------------------------------------------------------------------------------------------------------------------------------|-----------------------|
| LGG    | <b>*EGFR</b> , (11, 2.78e-06);                                                                                                |                       |
| OV     | <b>*BRD4</b> , CALR, LYL1, (19, 2.76e-06); <b>*SMARCA4</b> , CCNE1, (17, 2.9e-06); TPM4, KEAP1, <b>*DNM2</b> , (16, 2.9e-06); |                       |
| ESCA   | <b>*CTTN</b> , (16, 7.e-06); <b>*CCND1</b> , (15, 7.5e-06);                                                                   |                       |
| SKCM   | PICALM, EED, (28, 2.3e-06);                                                                                                   |                       |
| GBM    | <b>*IKZF1</b> , (43, 2.3e-07); LRIG3, (42, 2.54e-07); CDK4, <b>*WIF1</b> , HMGA2, (37, 3.7e-07); MDM2, (34, 4.4e-07);         |                       |
| LUSC   | SOX2, (28, 2.8e-06); <b>*PIK3CA</b> , <b>*TBL1XR1</b> , (27, 2.9e-06);                                                        |                       |
