# Supplementary material for: Identification of complex genomic rearrangements in cancers using CouGaR
Source: PubMed Central journal article supplement — Genome Res. 2017 Jan;27(1):107–17. doi: 10.1101/gr.211201.116 (PMC5204335; doi:10.1101/gr.211201.116), 2017-01
Supplement: supp_gr.211201.116_Supplemental_Table_S9.pdf [file supp_gr.211201.116_Supplemental_Table_S9.pdf]

| Sample        | Reason                                                                                                                                                                                 |
|---------------|----------------------------------------------------------------------------------------------------------------------------------------------------------------------------------------|
| TCGA-05-4430t | no WGS BAM files available                                                                                                                                                             |
| TCGA-05-5715  | no WGS BAM files available                                                                                                                                                             |
| TCGA-13-0751  | no WGS BAM files available                                                                                                                                                             |
| TCGA-16-1460  | no WGS BAM files available                                                                                                                                                             |
| TCGA-09-2045  | no WGS BAM files available                                                                                                                                                             |
| TCGA-06-0137  | MD5 ok - SOLID -> picard fails to get mean and stddev<br>"CollectInsertSizeMetrics All data categories were discarded because they contained < 0.05 of the total aligned paired data." |
| TCGA-06-0208  | MD5 ok - SOLID -> picard fails to get mean and stddev<br>"CollectInsertSizeMetrics All data categories were discarded because they contained < 0.05 of the total aligned paired data." |
| TCGA-10-0927  | MD5 ok - SOLID -> picard fails to get mean and stddev<br>"CollectInsertSizeMetrics All data categories were discarded because they contained < 0.05 of the total aligned paired data." |
| TCGA-13-0720  | MD5 ok - SOLID -> picard fails to get mean and stddev<br>"CollectInsertSizeMetrics All data categories were discarded because they contained < 0.05 of the total aligned paired data." |
| TCGA-44-3396  | No errors but only 24 clusters found that get filtered to zero in tumor , Normal has 5098 clusters that get filtered to less,<br>but tumor-normal = NULL                               |
| TCGA-66-2757  | MD5 ok - crashed cluster program                                                                                                                                                       |
| TCGA-05-4417  | failed to download 2x, both time tracker errors                                                                                                                                        |
| TCGA-EJ-5515  | failed to download 2x times                                                                                                                                                            |
| TCGA-FG-6691  | failed to download                                                                                                                                                                     |
