# Supplementary material for: Identification of complex genomic rearrangements in cancers using CouGaR
Source: PubMed Central journal article supplement — Genome Res. 2017 Jan;27(1):107–17. doi: 10.1101/gr.211201.116 (PMC5204335; doi:10.1101/gr.211201.116), 2017-01
Supplement: supp_gr.211201.116_Supplemental_Table_S10.pdf [file supp_gr.211201.116_Supplemental_Table_S10.pdf]

| Fusion/Gene | Left Primer | Left Sequence                 | Right Primer | Right Sequence        | Size (bp) |
|-------------|-------------|-------------------------------|--------------|-----------------------|-----------|
| A           | 4L-29       | CAGGAAGAGCTGCTGGAAAC          | 4R-29        | AGTGAATAGGCCAGGTGTGG  | 181       |
| B           | 2L-29       | GCTTGGGTGATCTGGAAAAG          | 2R-29        | AGATGGCCACTTGGAGACAC  | 202       |
| C           | 1L-29       | CAGCTATTTGGGAGGCTGAG          | 1R-29        | GGCAGTGGAAATCTGTGTGTG | 762       |
| D           | 8L-29       | CTGGGGGAACCTTCAATTTT          | 8R-29        | AAAAAGGCACAGCTGGAGAA  | 193       |
| E           | 5L-29       | CAGGCACTTGCCATTCATA           | 5R-29        | TCCAGTGGCAACTACCCTTC  | 179       |
| F           | 3L-29       | TGAGGCCCTGTCTCAAATAAA         | 3R-29        | ACACACGTGGATGCAGACAG  | 170       |
| G           | 9L-29       | GGGGAATATTTGCAGTGTGG          | 9R-29        | GAAATTCAGCCCCCTCAGTT  | 206       |
| H           | 6L-29       | TCTATGCCAGTGCTTACTCCTT        | 6R-29        | CTGTTCCACCAAAGCCAAAT  | 155       |
| I           | 7L-29       | TGAGCAGATTTTCTGTATATTTT<br>CA | 7R-29        | GTCTCCCAGGCTGCAGTG    | 150       |
| GPX7        | GPX7 Left   | ATTCTGGTTGGAGTGGTCTG          | GPX7 Right   | AAAAGGAAGGAGAGCAAAGC  | 129       |
