# Supplementary material for: Identification of complex genomic rearrangements in cancers using CouGaR
Source: PubMed Central journal article supplement — Genome Res. 2017 Jan;27(1):107–17. doi: 10.1101/gr.211201.116 (PMC5204335; doi:10.1101/gr.211201.116), 2017-01
Supplement: supp_gr.211201.116_Supplemental_Table_S11.pdf [file supp_gr.211201.116_Supplemental_Table_S11.pdf]

| <b>Fusion/Gene</b> | <b>Left Primer</b> | <b>Left Sequence</b> | <b>Right Primer</b> | <b>Right Sequence</b> | <b>Size (bp)</b> |
|--------------------|--------------------|----------------------|---------------------|-----------------------|------------------|
| A                  | 1L-6               | AGGCACACACTAAGGGCAAC | 1R-6                | AGAAAACAGACGCTGGGAGA  | 205              |
| B                  | 2L-6               | GGCAGGTTATAAGGGGAGGA | 2R-6                | TGATCTTGGCTCACTGCAAC  | 228              |
| C                  | 3L-6               | AACTAAGCCCAAAGCAAGCA | 3R-6                | AGCTCCATGACCACACCTCT  | 174              |
| D                  | 4L-6               | TGACTGAAACGGAGCATGAG | 4R-6                | CACTAGGGGCTTGCATGATT  | 214              |
| E                  | 5L-6               | AGGAGTCAAGATGGCACCAC | 5R-6                | CACACACACACACACACCT   | 187              |
| F                  | 6L-6               | GCAGGAGAATTGCTTGAACC | 6R-6                | CGTGGGAATTATGGGAGCTA  | 250              |
| G                  | 7L-6               | TTAGCAGGGTACAACCACGA | 7R-6                | AAGGAGACCCTTGGAGCCTA  | 241              |
| H                  | 8L-6               | CGTCACACGACCTGGTTCTA | 8R-6                | AGCCACAGCATCTCTCTGT   | 233              |
| GPX7               | GPX7 Left          | ATTCTGGTTGGAGTGGTCTG | GPX8 Right          | AAAAGGAAGGAGAGCAAAGC  | 129              |
