# Supplementary material for: Identification of complex genomic rearrangements in cancers using CouGaR
Source: HighWire-hosted journal article supplement (doi:10.1101/gr.211201.116), 2016-11-14
Supplement: Supplemental_Information.docx [file Supplemental_Information.docx]

**Identification of complex genomic rearrangements in cancers using CouGaR**

Misko Dzamba1,*, Arun K. Ramani2,*, Pawel  Buczkowicz3,4,5, Yue Jiang2, ManYu3,4,5, Cynthia Hawkins3,4,5, and Michael Brudno1,2,@

1 Department of Computer Science, University of Toronto, Toronto, Ontario, Canada.

2 Centre for Computational Medicine, The Hospital for Sick Children, Toronto, Ontario, Canada

3 Division of Pathology, The Hospital for Sick Children, University of Toronto, Toronto, Ontario, Canada.

4 Arthur and Sonia Labatt Brain Tumour Research Centre, The Hospital for Sick Children, Toronto, Ontario, Canada.

5 Department of Laboratory Medicine and Pathobiology, Faculty of Medicine, University of Toronto, Toronto, Ontario, Canada.

* These authors contributed equally

@ Corresponding author

**Experimental validation of CGRs in Pediatric high-grade Gliomas**

We applied CouGaR to the WGS data from twenty DIPG tumour-normal pairs and identified novel breakpoints in 9 of them (Table S1).

| **Sample** | **Contigs** | **Linear** | **Circular** |
| --- | --- | --- | --- |
| DIPG01 | 6 | 2 | 4 |
| DIPG03 | 0 | 0 | 0 |
| DIPG04 | 0 | 0 | 0 |
| DIPG06 | 3 | 3 | 0 |
| DIPG07 | 1 | 0 | 1 |
| DIPG08 | 0 | 0 | 0 |
| DIPG18 | 0 | 0 | 0 |
| DIPG19 | 0 | 0 | 0 |
| DIPG24 | 0 | 0 | 0 |
| DIPG25 | 0 | 0 | 0 |
| DIPG26 | 0 | 0 | 0 |
| DIPG27 | 0 | 0 | 0 |
| DIPG28 | 4 | 4 | 0 |
| DIPG29 | 8 | 3 | 5 |
| DIPG30 | 1 | 0 | 1 |
| DIPG57 | 2 | 0 | 2 |
| DIPG58 | 0 | 0 | 0 |
| DIPG60 | 0 | 0 | 0 |
| DIPG61 | 2 | 1 | 1 |
| DIPG62 | 2 | 2 | 0 |

Table S1: The set of DIPG samples that were analyzed using CouGaR. For each of the samples the table lists total number of contigs identified by our algorigthm and the number of contigs that were circular in nature and the number that were linear.

***Analysis of DIPG29***

Figure S1 Analysis of DIPG29. A) The predicted CGRs are convolved into a unique structure as visualized by CouGaR-Viz. Each of the identified contigs is listed separately. Genomic segments are represented by red lines and are interrupted by black vertical lines to show breakpoints. Directional arrows are used to show connections between the segments and thickness of the arrows and red segments represent the identified copy counts. Genes overlapping the positive strand are depicted as green boxes and genes overlapping the negative strand are shown in purple.

We chose 9 breakpoints for experimental validation using PCR and Sanger sequencing and were successful in validating 7 (Figure 2B, TableS2)

| Breakpoint | From Chr | Pos 1 | To Chr | Pos 2 | Copy count estimate | qPCR copy count | PCR Product | Sanger Validation |
| --- | --- | --- | --- | --- | --- | --- | --- | --- |
| A | 1 | 203,246,644 | 2 | 8,912,431 | 12 | 11.1 | + | + |
| B | 1 | 203,266,639 | 1 | 204,804,356 | 24 | 32.1 | + | + |
| C | 1 | 203,369,034 | 1 | 204,164,224 | 12 | n/a | - | n/a |
| D | 1 | 203,705,025 | 2 | 16,170,477 | 15 | n/a | - | n/a |
| E | 1 | 204,608,941 | 2 | 8,931,952 | 12 | 9.7 | + | + |
| F | 1 | 204,625,362 | 2 | 8,864,662 | 33 | 30 | + | + |
| G | 2 | 8,820,449 | 2 | 16,174,542 | 27 | 28.8 | + | + |
| H | 2 | 8,963,783 | 2 | 15,743,871 | 42 | 34.6 | + | + |
| I | 2 | 15,744,183 | 2 | 16,073,416 | 42 | 41.7 | + | + |
| GPX7 | 1 | 53,068,043 | 1 | 53,074,723 | 2 | 2 | + | n/a |

Table S2: We chose 9 breakpoints from DIPG29 for experimental validation. For each of the chosen breakpoints, the table shows the position of the breakpoints, the estimated copy counts, the qPCR based copy counts and indicate whether the breakpoint was validated by PCR and by Sanger sequencing using a ‘+’ sign.

***Analysis of DIPG06***

We identified 10 breakpoints in DIPG06 and the predicted structure is convolved by our algorithm into a unique linear contig (Figure S1) spanning parts of Chromosome 8, 10, 13 and 22. We were able to design unique primers to 8 of the 10 breakpoints and were successful in validating all 8 breakpoints (Figure S1, Table S3). Furthermore, each of these were predicted to be present at 15 copies which is also validated by the qPCR results. Gene overlap analysis identified 28 genes to be present in the CGR, four of these (*MYC*, *KIT*, *PDGFRA* and *PDGFRB*) are known oncogenes.

Figure S2 Analysis of DIPG06. A) The predicted CGRs are convolved into a unique structure as visualized by CouGaR-Viz. Genomic segments are represented by red lines and are interrupted by black vertical lines to show breakpoints. Directional arrows are used to show connections between the segments and thickness of the arrows and red segments represent the identified copy counts. Genes overlapping the positive strand are depicted as green boxes and genes overlapping the negative strand are shown in purple. Breakpoints that were selected for testing are shown as letters (A to H) in circles. Here green circles indicated breakpoints that were validated B). 9 breakpoints were selected for validation and for each of these unique primers were designed and copy counts were estimated with qPCR. *GPX7* gene was used for control to normalize the counts. For each of the tested breakpoints the copy counts estimated by qPCR are shown in purple (error bars show standard deviation) and copy counts estimated by CouGar are shown as orange bars. In all cases the qPCR results match the predicted copy counts.

| **Breakpoint** | **From Chr.** | **Pos 1** | **To Chr.** | **Pos 2** | **Copy count estimate** | **qPCR copy count** | **PCR Product** | **Sanger Validation** |
| --- | --- | --- | --- | --- | --- | --- | --- | --- |
| A | 8 | 130,953,544 | 8 | 128,653,052 | 15 | 15.1 | + | + |
| B | 8 | 128,666,609 | 8 | 129,034,194 | 15 | 19 | + | + |
| C | 8 | 128,683,093 | 10 | 47,145,556 | 15 | 17 | + | + |
| D | 8 | 129,171,189 | 8 | 128,930,932 | 15 | 18.3 | + | + |
| E | 10 | 49,223,973 | 8 | 129,845,335 | 15 | 12.1 | + | + |
| F | 10 | 47,109,482 | 22 | 38,406,654 | 15 | n/a | + | + |
| G | 22 | 39,621,582 | 10 | 49,253,846 | 15 | 11.7 | + | + |
| H | 22 | 38,442,167 | 22 | 39,698,822 | 15 | 17.3 | + | + |
| GPX7 | 1 | 53,068,043 | 1 | 53,074,723 | 2 | 2 | + | n/a |

Table S3: We chose 8 breakpoints from DIPG06 for experimental validation. For each of the chosen breakpoints, the table shows the position of the breakpoints, the estimated copy counts, the qPCR based copy counts and whether the breakpoint was validated by PCR and by Sanger sequencing.

| Cougar junctions | | | | | | BAMBAM Pipeline | nFuse |
| --- | --- | --- | --- | --- | --- | --- | --- |
| ID | chr1 | pos1 | chr2 | pos2 | validation | Report | Report |
| A | 1 | 203246644 | 2 | 8912431 | Y | Y |  |
| B | 1 | 203266639 | 1 | 204804356 | Y | Y | Y |
| C | 1 | 203369034 | 1 | 204164224 | N | Y | Y |
| D | 2 | 16170477 | 1 | 203705025 | N | Y |  |
| E | 1 | 204608941 | 2 | 8931952 | Y | Y |  |
| F | 1 | 204625362 | 2 | 8864662 | Y | Y | Y |
| G | 2 | 16174542 | 2 | 8820449 | Y | Y | Y |
| H | 2 | 8963783 | 2 | 15743871 | Y | Y | Y |
| I | 2 | 15744183 | 2 | 16073416 | Y | Y | Y |

**Table S4**. **Comparison of the experimentally tested breakpoints identified in DIPG29.** We ran BAMBAM and nFuse on DIPG29 and compared the results against the set of 9 breakpoints that were tested by PCR. While all of the 9 junctions were found by BAMBAM, only 6 of the 9 were identified by nFuse.

**See excel file for table S5**

**Table S5. Distribution of contigs identified in each of the 467 TCGA samples analyzed by CouGaR.**

**See excel file for table S6**

Table S6. Compiled list of tumour associated genes that were identified from various databases and publications.

**See excel file for table S7**

Table S7. Frequency of complete genes with copy count ≥6, for each cancer subtype. Here we report the genes that fully overlap identified contigs and score significantly in each of the samples. We also report their pvalue and the number of samples in which the genes are present.

**See excel file for table S8**

Table S8. Frequency of partial genes with copy count ≥6, for each cancer subtype. Here we report genes that partially overlap identified contigs and score significantly in each of the samples. We also report their pvalue and the number of samples in which the genes are present.

| **Sample** | **Reason** |
| --- | --- |
| TCGA-05-4430t | no WGS BAM files available |
| TCGA-05-5715 | no WGS BAM files available |
| TCGA-13-0751 | no WGS BAM files available |
| TCGA-16-1460 | no WGS BAM files available |
| TCGA-09-2045 | no WGS BAM files available |
| TCGA-06-0137 | MD5 ok - SOLID -> picard fails to get mean and stddev "CollectInsertSizeMetrics All data categories were discarded because they contained < 0.05 of the total aligned paired data." |
| TCGA-06-0208 | MD5 ok - SOLID -> picard fails to get mean and stddev "CollectInsertSizeMetrics All data categories were discarded because they contained < 0.05 of the total aligned paired data." |
| TCGA-10-0927 | MD5 ok - SOLID -> picard fails to get mean and stddev "CollectInsertSizeMetrics All data categories were discarded because they contained < 0.05 of the total aligned paired data." |
| TCGA-13-0720 | MD5 ok - SOLID -> picard fails to get mean and stddev "CollectInsertSizeMetrics All data categories were discarded because they contained < 0.05 of the total aligned paired data." |
| TCGA-44-3396 | No errors but only 24 clusters found that get filtered to zero in tumor , Normal has 5098 clusters that get filtered to less, |
| but tumor-normal = NULL |
| TCGA-66-2757 | MD5 ok - crashed cluster program |
| TCGA-05-4417 | failed to download 2x, both time tracker errors |
| TCGA-EJ-5515 | failed to download 2x times |
| TCGA-FG-6691 | failed to download |

Table S9. Errors associated with TCGA samples. We were unable to process 14 TCGA samples due to various reasons.

| **Fusion/Gene** | **Left Primer** | **Left Sequence** | **Right Primer** | **Right Sequence** | **Size (bp)** |
| --- | --- | --- | --- | --- | --- |
| A | 4L-29 | CAGGAAGAGCTGCTGGAAAC | 4R-29 | AGTGAATAGGCCAGGTGTGG | 181 |
| B | 2L-29 | GCTTGGGTGATCTGGAAAAG | 2R-29 | AGATGGCCACTTGGAGACAC | 202 |
| C | 1L-29 | CAGCTATTTGGGAGGCTGAG | 1R-29 | GGCAGTGGAATCTGTGTGTG | 762 |
| D | 8L-29 | CTGGGGGAACCTTCAATTTT | 8R-29 | AAAAAGGCACAGCTGGAGAA | 193 |
| E | 5L-29 | CAGGCACTTGCCATTCACTA | 5R-29 | TCCAGTGGCAACTACCCTTC | 179 |
| F | 3L-29 | TGAGGCCCTGTCTCAAATAAA | 3R-29 | ACACACGTGGATGCAGACAG | 170 |
| G | 9L-29 | GGGGAATATTTGCAGTGTGG | 9R-29 | GAAATTCAGCCCCCTCAGTT | 206 |
| H | 6L-29 | TCTATGCCAGTGCTTTACTCCTT | 6R-29 | CTGTTCCACCAAAGCCAAAT | 155 |
| I | 7L-29 | TGAGCAGATTTTCTGTATATTTTCCA | 7R-29 | GTCTCCCAGGCTGCAGTG | 150 |
| GPX7 | GPX7 Left | ATTCTGGTTGGAGTGGTCTG | GPX7 Right | AAAAGGAAGGAGAGCAAAGC | 129 |

Table S10– Primers designed for each of the 9 breakpoints tested from DIPG29

| **Fusion/Gene** | **Left Primer** | **Left Sequence** | **Right Primer** | **Right Sequence** | **Size (bp)** |
| --- | --- | --- | --- | --- | --- |
| A | 1L-6 | AGGCACACACTAAGGGCAAC | 1R-6 | AGAAAACAGACGCTGGGAGA | 205 |
| B | 2L-6 | GGCAGGTTATAAGGGGAGGA | 2R-6 | TGATCTTGGCTCACTGCAAC | 228 |
| C | 3L-6 | AACTAAGCCCAAAGCAAGCA | 3R-6 | AGCTCCATGACCACACCTCT | 174 |
| D | 4L-6 | TGACTGAAACGGAGCATGAG | 4R-6 | CACTAGGGGCTTGCATGATT | 214 |
| E | 5L-6 | AGGAGTCAAGATGGCACCAC | 5R-6 | CACACACACACACACACACCT | 187 |
| F | 6L-6 | GCAGGAGAATTGCTTGAACC | 6R-6 | CGTGGGAATTATGGGAGCTA | 250 |
| G | 7L-6 | TTAGCAGGGTACAACCACGA | 7R-6 | AAGGAGACCCTTGGAGCCTA | 241 |
| H | 8L-6 | CGTCACACGACCTGGTTCTA | 8R-6 | AGCCCACAGCATCTCTCTGT | 233 |
| GPX7 | GPX7 Left | ATTCTGGTTGGAGTGGTCTG | GPX8 Right | AAAAGGAAGGAGAGCAAAGC | 129 |

Table S11 Primers designed for each of the 8 breakpoints tested from DIPG06

**Comparison of CouGaR to existing methods.**

***TCGA-06-0648***: We identify two amplified contigs (Figure S2), one of which is linear (520kb) and the other one circular (890kb).

The larger circular contig 060648-a consists of 15 distant regions rearranged from chromosome 12 and includes *MDM2* a known oncogene. MDM2 is an E3 ubiquitin-protein ligase and a negative regulator of the p53 tumour suppressor [ref]. We estimate the copy count of this contig to be 48 and the predicted structure is almost identical to that predicted by Sanborn et al., we, however, failed to detect a small (230bp) fragment inserted from chromosome 9. Read pairs originating from this small inserted fragment are difficult to map, leading to a significant underestimation of DOC for the region. Since the mean WGS fragment size is 310bp, it is likely that reads originating from this region will have their sequence split over a breakpoint and therefore difficult to map to the reference. Additionally read-pairs spanning over this small region form the adjacency needed to complete this circular contig.

The smaller linear contig 060648-b, is derived from a single region at the end of chromosome 22 and has an estimated copy count of 9. This amplification may represent a more complex event that has had tumor adjacencies obscured by low mapability regions at the end of the chromosome 22. Alternatively this can represent multiple overlapping contigs with low copy count (3 or 4), in which case only the commonly amplified region (>5 copies) would be reported. Nevertheless our algorithm is robust to missing tumor adjacencies and reports the bare amplification. This contig amplifies the known oncogene *MDM2* and fusion variants of four other oncogenes *RAP1B*, *CPM*, *IFNG-AS1* and *NUP107*.

**Figure S3 Visualization of *TCGA-06-0648*.** A) The predicted CGRs are convolved into a unique structure as visualized by CouGaR-Viz. Genomic segments are represented by red lines and are interrupted by black vertical lines to show breakpoints. Directional arrows are used to show connections between the segments and thickness of the arrows and red segments represent the identified copy counts. Genes overlapping the positive strand are depicted as green boxes and genes overlapping the negative strand are shown in purple. There are two contigs identified, one of which is circular and the other linear

***TCGA-06-0152***: Our algorithm identifies five circular contigs of varying sizes and complexity (Figure S3). The highly amplified contig 060152-a (copy count 114) is composed of two regions, one on chromosome 7 and the other on chromosome 12 and harbours the oncogene *EGFR*. This contig is formed due to the circularizing a 923kb region containing *EGFR* with a 5.62kb fragment from the middle of *FAM19A2* and is identical to the one reported by Sanborn et al. (2013).

The contig 060152-b (copy count 63) is 656kb long and composed of 10 regions from chromosome 12. This contig spans 28 genes and interrupts 9 others, *C12orf56*, *CPM*, *NUP107*, *SRGAP1*, *AGAP2*, *METTL21B*, *YEATS4*, *CNOT2* and *LEMD3*. This contig corresponds to half of the double minute reported by Sanborn et al. (2013).

Contigs 060152-c and 060152-d are both circular with respective copy count and size of (1.42mb, 27) and (1.82mb,12). These two contigs overlap the remaining regions reported by Sanborn et al. (2013), but also include two new previously unreported regions. One of which is 290kb long and amplified 39 times and the other 200kb long and amplified 12 times. These two contigs overlap with each other and the previously mentioned contig 060152-b. The overlap of circular contigs is not easily resolved from WGS data, which we explore further in discussion.

**Figure S4 Visualization of *TCGA-06-0152*.** A) The predicted CGRs are convolved into a unique structure as visualized by CouGaR-Viz. Genomic segments are represented by red lines and are interrupted by black vertical lines to show breakpoints. Directional arrows are used to show connections between the segments and thickness of the arrows and red segments represent the identified copy counts. Genes overlapping the positive strand are depicted as green boxes and genes overlapping the negative strand are shown in purple.

***TCGA-06-0145***: Our approach detected a 789kb highly amplified circular contig 060145-a containing *EGFR* , present with a copy count of 117 (Figure S4). This contig is intersected by two additional contigs 060145-(b,c) which clearly interrupt *EGFR* and *LANCL2*. The presence of these variable structures can be explained by presence of sub-clonal rearrangements that each harbour their own mutant copies. These predicted contigs are similar to those found by Sanborn et al. (2013). In addition to this highly amplified contig, another circular contig 060145-d consisting of a segment from chromosome 12 in tandem was identified. This previously unreported amplification has length 780kb and a total copy count of 12.

**Figure S5 Visualization of *TCGA-06-0145*.** A) The predicted CGRs are convolved into a unique structure as visualized by CouGaR-Viz. Genomic segments are represented by red lines and are interrupted by black vertical lines to show breakpoints. Directional arrows are used to show connections between the segments and thickness of the arrows and red segments represent the identified copy counts. Genes overlapping the positive strand are depicted as green boxes and genes overlapping the negative strand are shown in purple.

***TCGA-13-0723***: We detected 9 amplified contigs (Figure S5), 3 of which have been previously reported 130723-(a,e,h) (Oesper et al., 2012). One contig (130723-a) consists of a BFB localized to the first 2Mb of chromosome 18. Another two contigs (130723-e,h) describe a tandem duplication and interchromosomal fusion respectively. Although the structure of the remaining 6 amplified contigs has not been previously reported, the copy counts induced by them are consistent with those that have (Oesper et al., 2012).

**Figure S6 Visualization of *TCGA-13-0723*.** A) The predicted CGRs are convolved into a unique structure as visualized by CouGaR-Viz. Genomic segments are represented by red lines and are interrupted by black vertical lines to show breakpoints. Directional arrows are used to show connections between the segments and thickness of the arrows and red segments represent the identified copy counts. Genes overlapping the positive strand are depicted as green boxes and genes overlapping the negative strand are shown in purple.


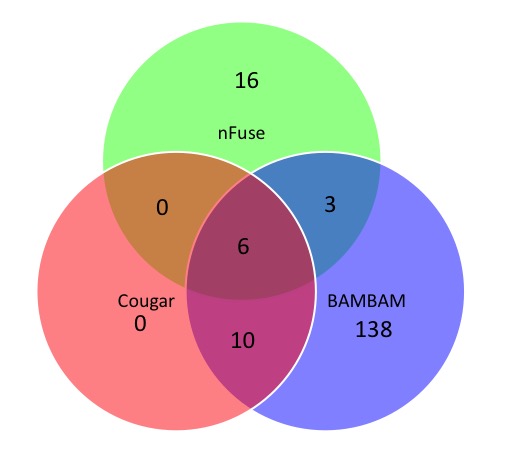


**Figure S7. Contigs identified by three methods on DIPG29.** We analyzed DIPG29 using 2 additional methods and found that 6 of the 16 contigs identified by CouGaR were also identified by BAMBAM and nFuse. While BAMBAM finds all 16 contigs found by CouGaR, it also finds an additional 138 contigs. nFuse on the other hand finds a total of 22 contigs, 6 of which overlap CouGaR.

**Figure S8. Sequencing coverage in samples.** We split the 467 samples into high coverage (>30x; red bars) or low coverage (<30x; green bars) and found that a big proportion of Tumours (A) and normal (B) samples have low coverage. We also compared the coverage ratio between tumour and normal samples (C) and find them to be nearly equal across most of the samples.

**Figure S9 Distribution of contig lengths across samples.** The length of contigs identified in each of the samples across all tumour types in consistent (~5MB) and there is no difference between high coverage (red bars) and low coverage samples (green bars).

**Figure S10. Percentage of samples with a contig.**  Across each tumour type we compared the percentage of samples that carried at least one contig and found the distribution to range from 1% for THCA to ~80% for ESCA. On average we find ~20% of all samples to have a contig present.

**Figure S11. Clusters with large standard deviations are due to low quality mapping.** For 10 random TCGA samples we binned clusters based on their standard deviations and estimated the average quality of the mapped reads in each of the bins. We find that for clusters with large standard deviations the vast majority of the reads have very low mapping quality.

**Format of input data for CouGaR-Viz**

CouGaR-viz is a visualization package for laying out complex genomic rearrangements, specifically focusing on those occuring in amplified regions. It takes as input a genomic regions file that describes the locations the amplifications in the CGR. Each genomic region is made up of two lines, the first describing germline linkages (edges) and the second describing somatic linkages found in the tumor. The software uses a gene annotation file (hg18 and hg19 are provided with the package) to compare the coordinates of rearrangements to the gene annotations. The visualization package is written in “racket” and is available on github (<https://github.com/compbio-UofT/CouGaR-viz>).

The genomic regions file is made up from two lines, the first describing germ line regions (edges) and the second describing somatic links found in the tumour. Two coordinates and four additional values describe each edge. The coordinates correspond to the start and end locations of the contigs (each with the chromosome and nucleotide position) and the 4 additional values correspond to edge type (0-4), copy-count, germ-line coverage, and somatic coverage. All the contigs identified in this analysis can be downloaded from the CouGaR-viz github site, which also give more details on the visualization package.

**Mapping to alternate reference Genome**

In order to be consistent with our analysis of CGRs in DIPG29 reported in Buczkowicz et al (Nat Genet 46: 451–6.) we continued to use GRCh37 for all of our analysis reported in this manuscript. Realigning reads to GRCh38 (the current version of the genome) should not significantly affect our conclusions, as the bulk of the large scale differences between GRCh38 and 37 addressed poorly mappable regions of the genomes, such as centromeres and regions with high polymorphism rates (alternate loci). Only ~100 assembly gaps, which would have the largest impact on our analysis, were closed or reduced from GRCh37 to GRCh38 (<http://genomeref.blogspot.ca/2013/12/announcing-grch38.html>).
